# Supplementary material for: Design, synthesis, and characterization of a fluoro substituted novel pyrazole nucleus clubbed with 1,3,4-oxadiazole scaffolds and their biological applications
Source: Royal Society of Chemistry journal article supplement (doi:10.1039/c6ra01349j), 2016-01-01

**Design, Synthesis and characterization of fluoro substituted novel pyrazole nucleus clubbed with 1,3,4-oxadiazole scaffolds and their biological applications**

*Sharad C. Karad<sup>a</sup>, Vishal B. Purohit<sup>a</sup>, Jemin R. Avalani,<sup>b</sup> Nirav H. Sapariya<sup>a</sup>, and Dipak K. Raval<sup>a\*</sup>*

*<sup>a</sup>Department of Chemistry, Sardar Patel University, Vallabh Vidyanagar- 388 120, Gujarat, India*

*<sup>b</sup>Shree A. N. Patel P. G. Institute, Anand, 388120, Gujarat, India  
E-mail: [dipanalka@yahoo.com](mailto:dipanalka@yahoo.com); [krdsharad1126@gmail.com](mailto:krdsharad1126@gmail.com).*

**Supplementary Information**

<sup>1</sup>H NMR spectra of compound 7a

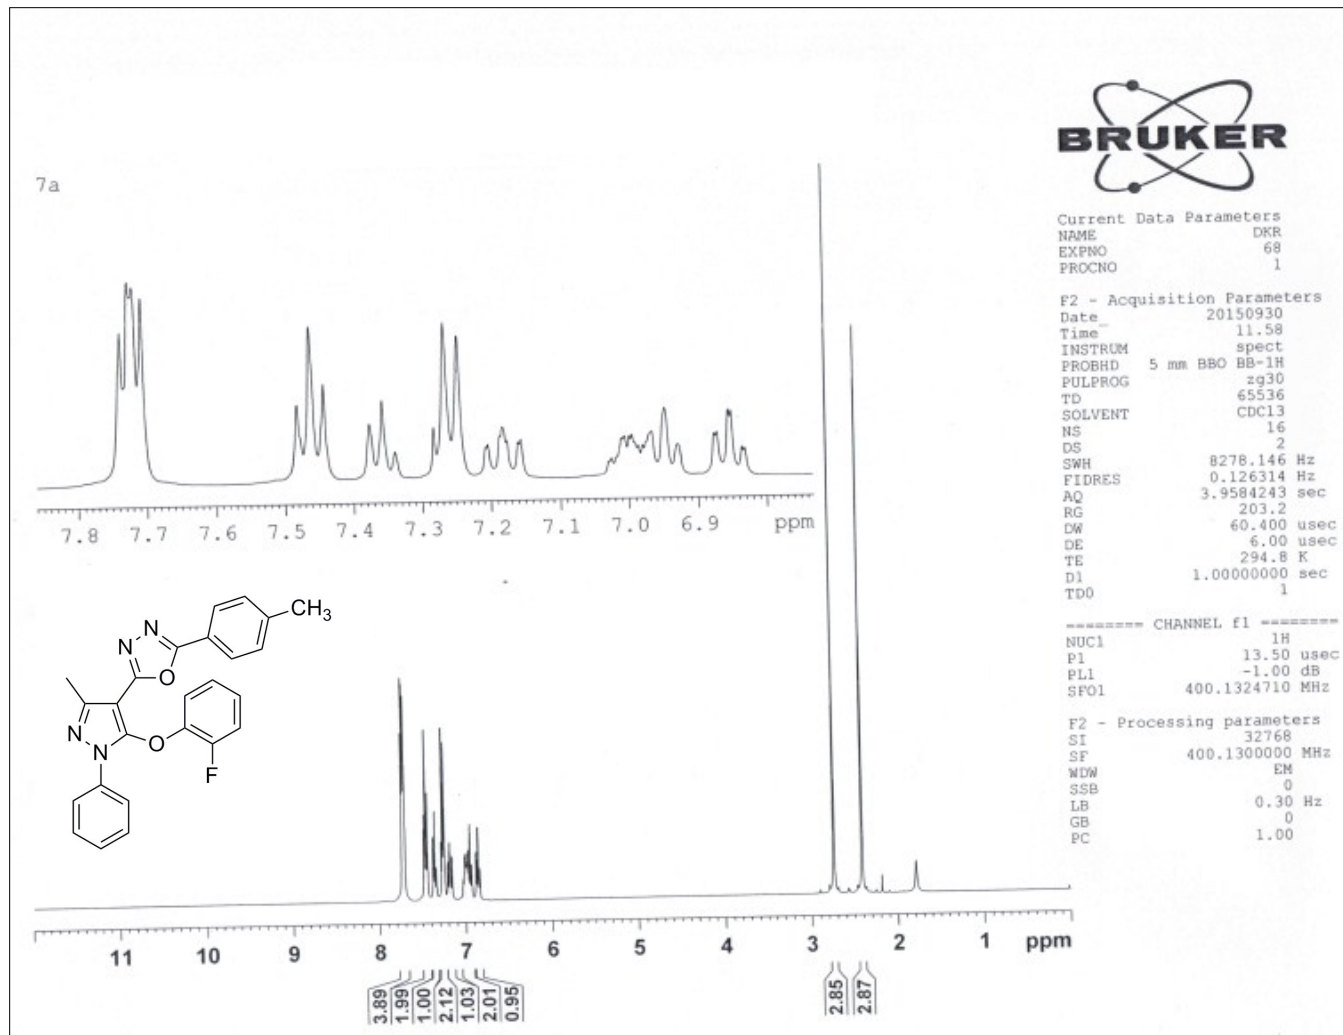

<sup>1</sup>H NMR spectra of compound 7b

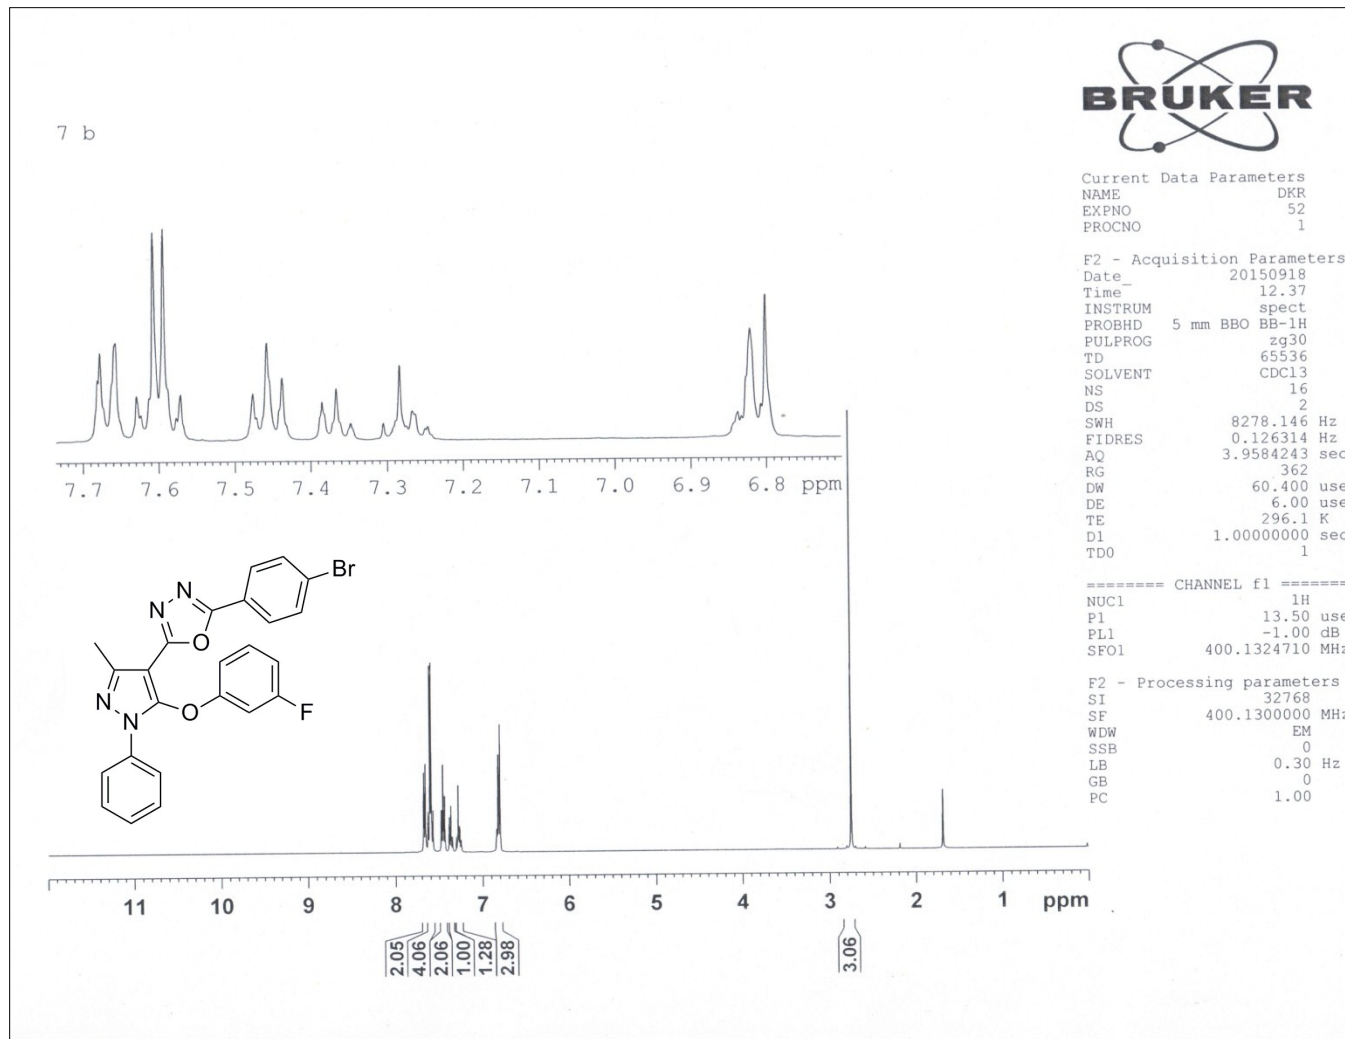

<sup>1</sup>H NMR spectra of compound 7c

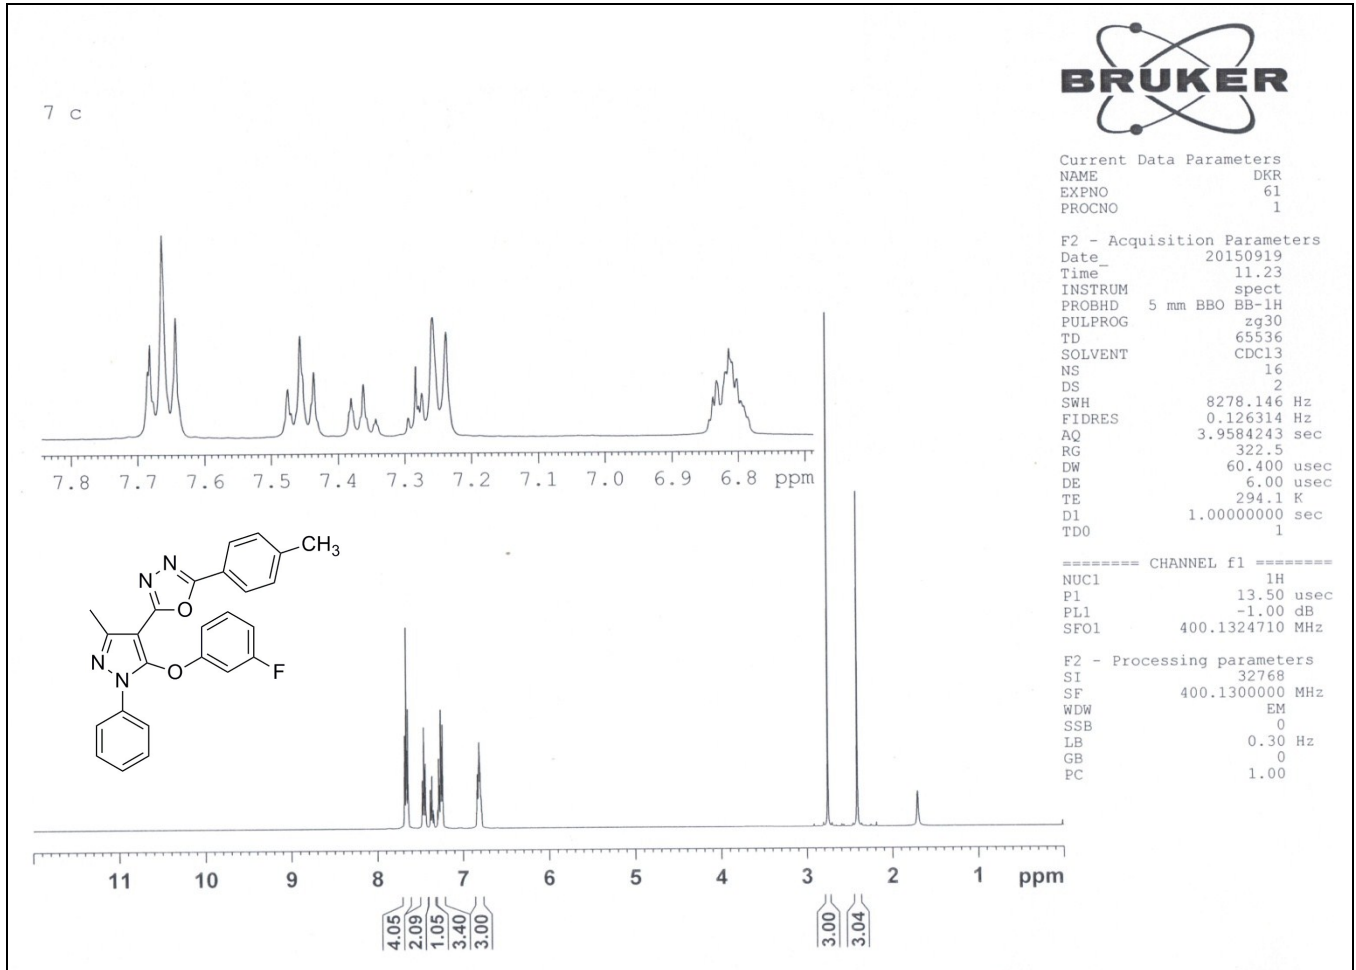



<sup>1</sup>H NMR spectra of compound 7d

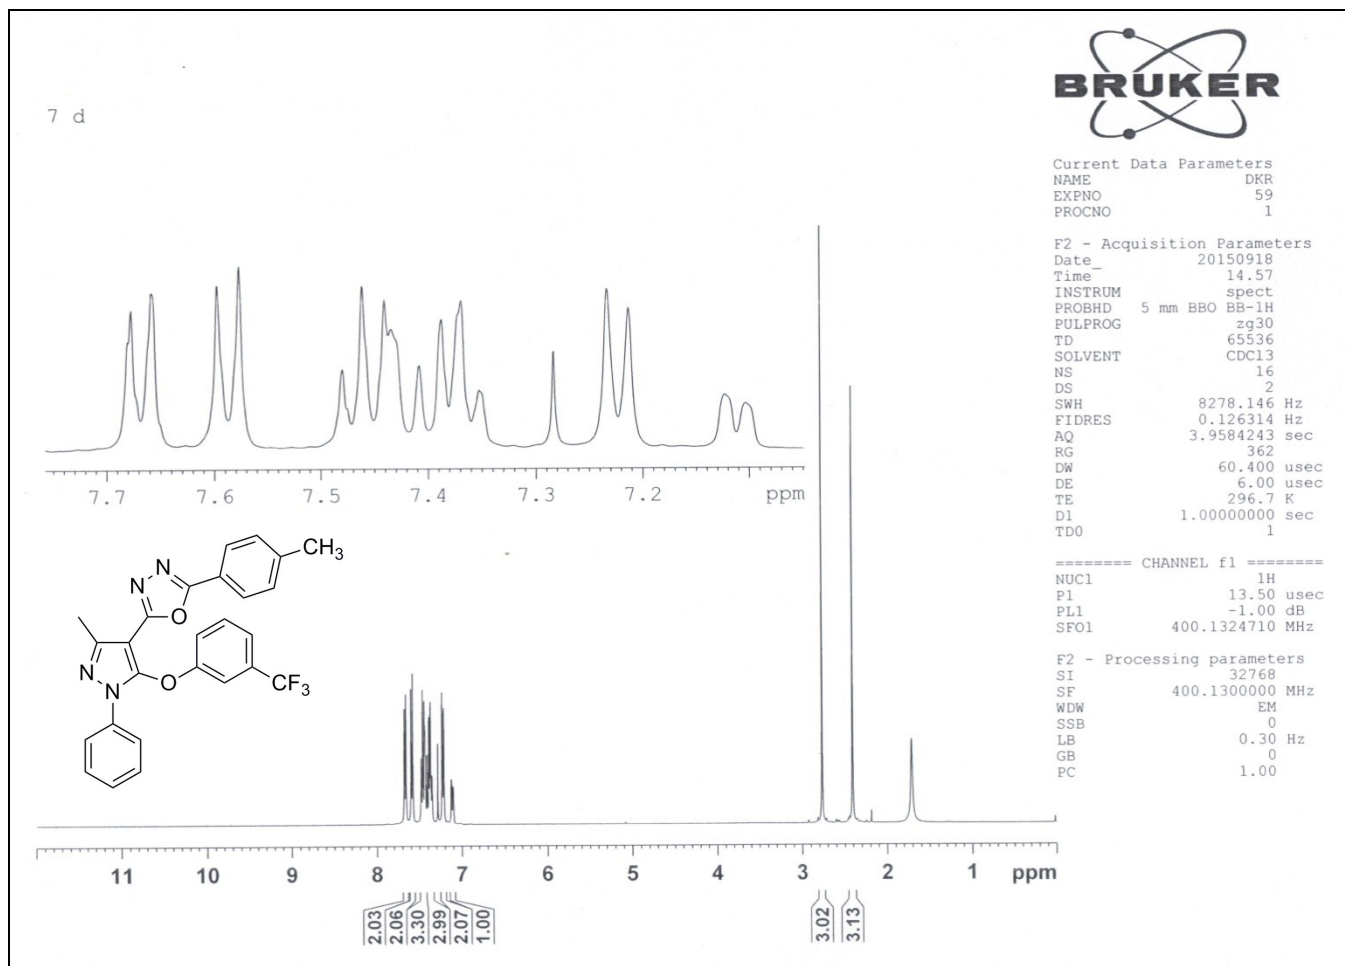

<sup>1</sup>H NMR spectra of compound 7e

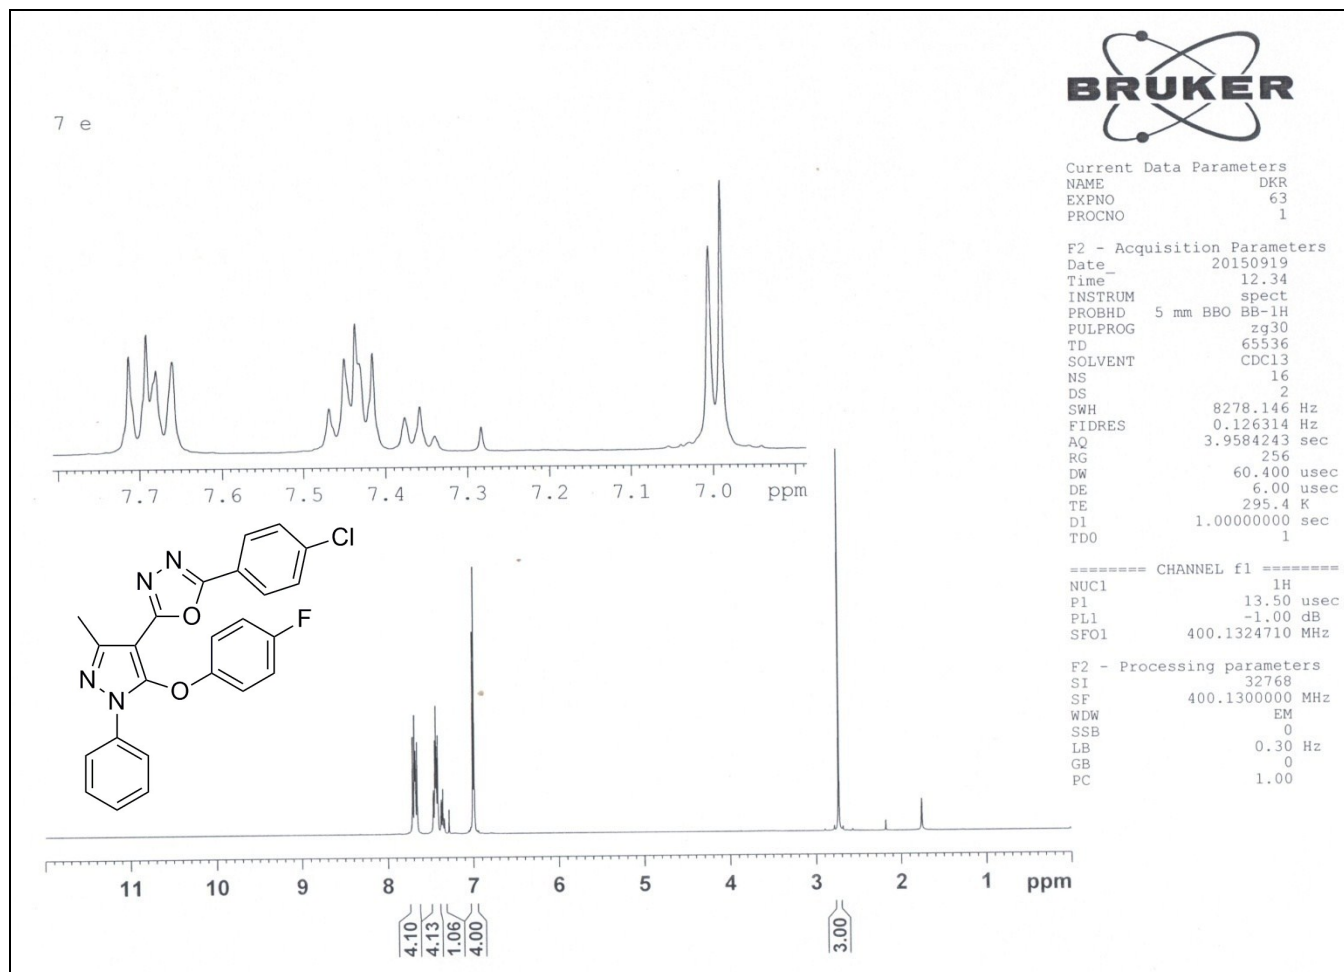

<sup>1</sup>H NMR spectra of compound 7f

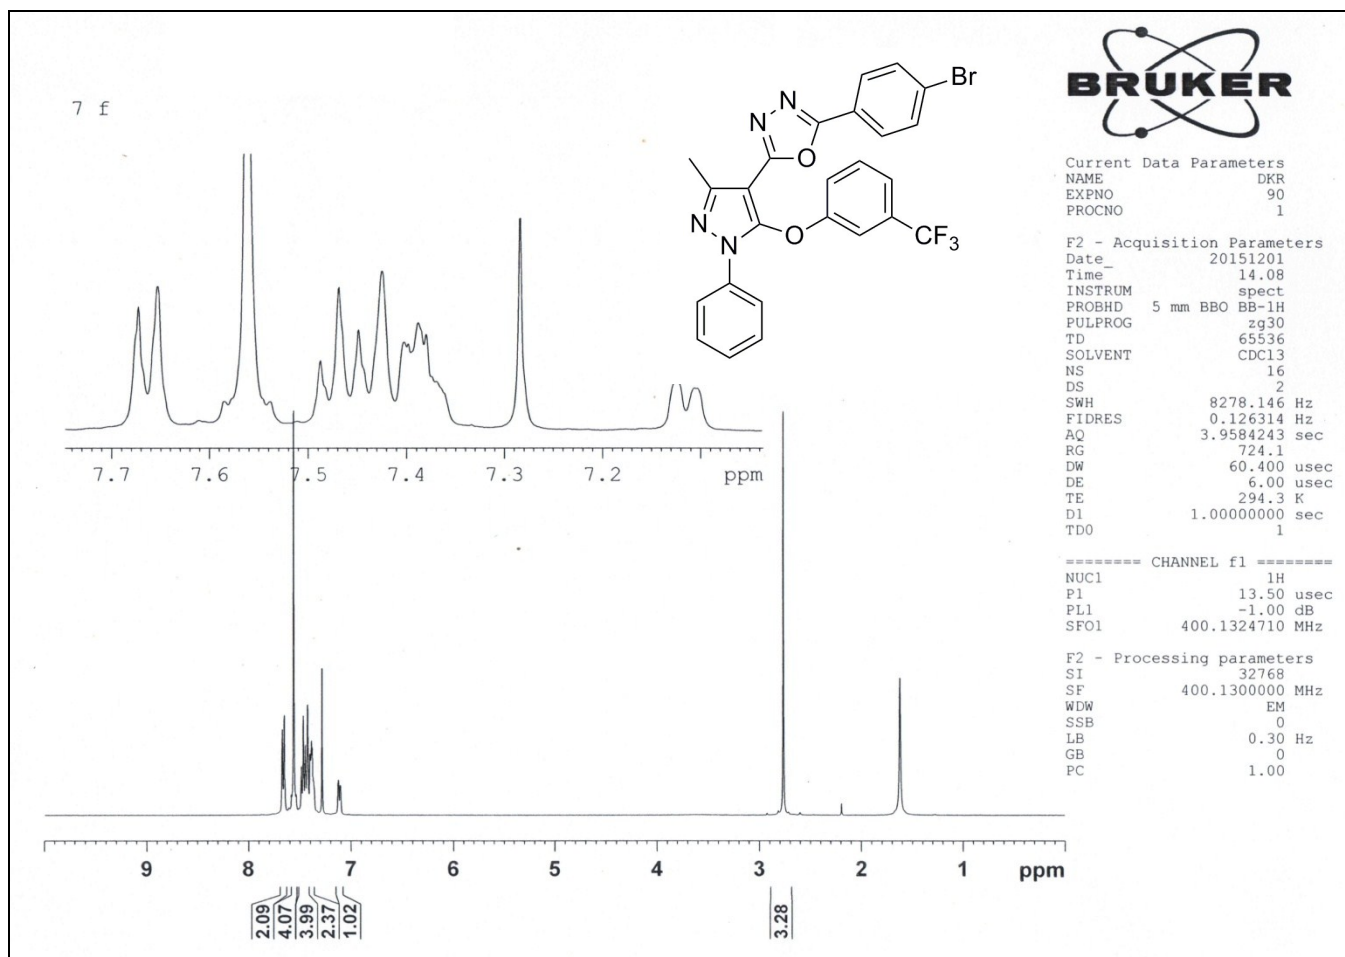

<sup>1</sup>H NMR spectra of compound 7g

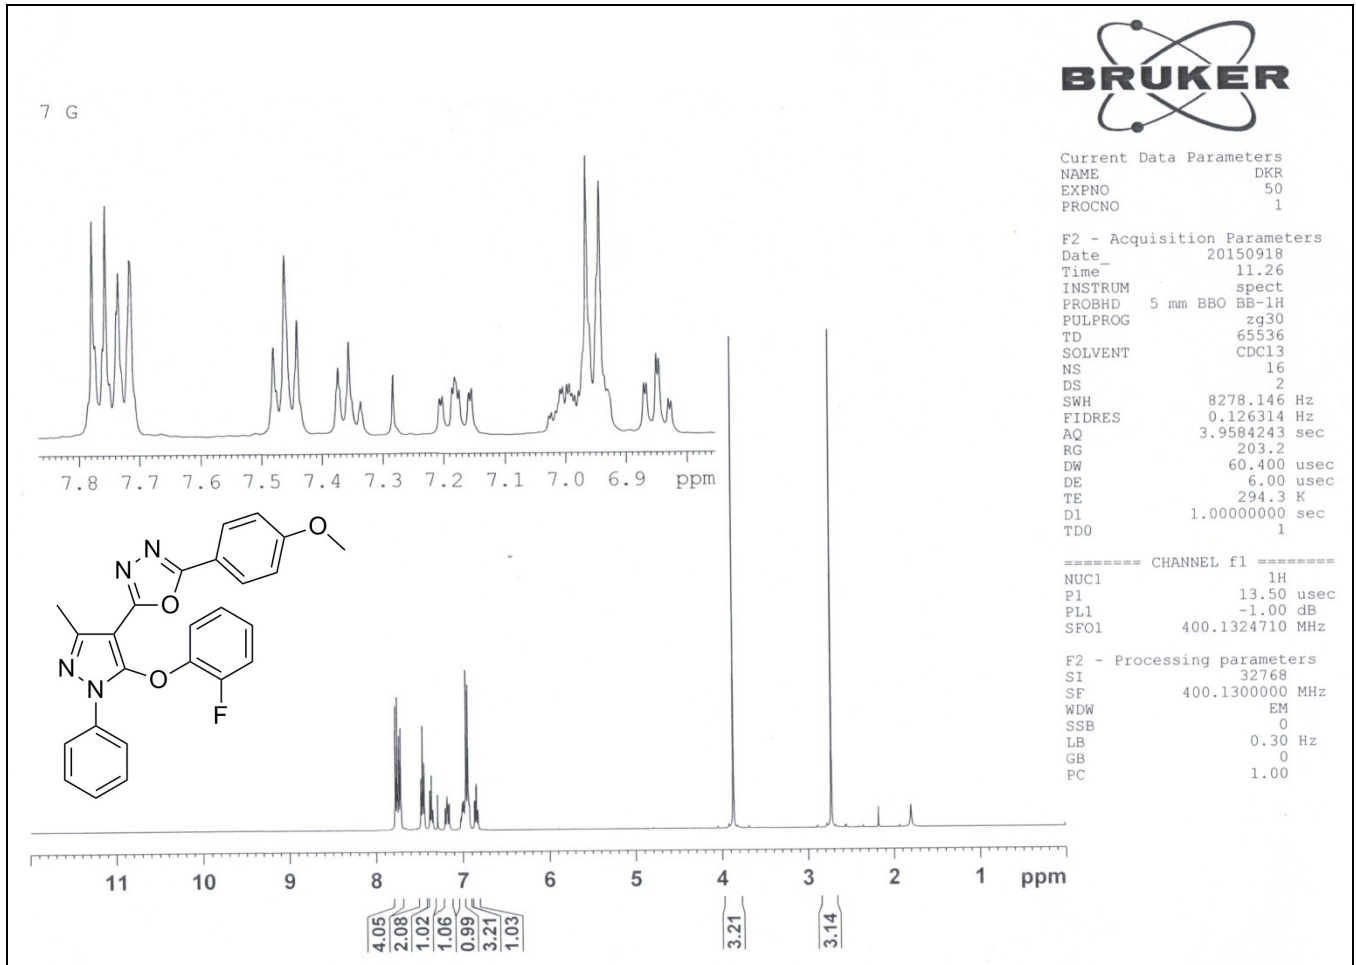

<sup>1</sup>H NMR spectra of compound 7j

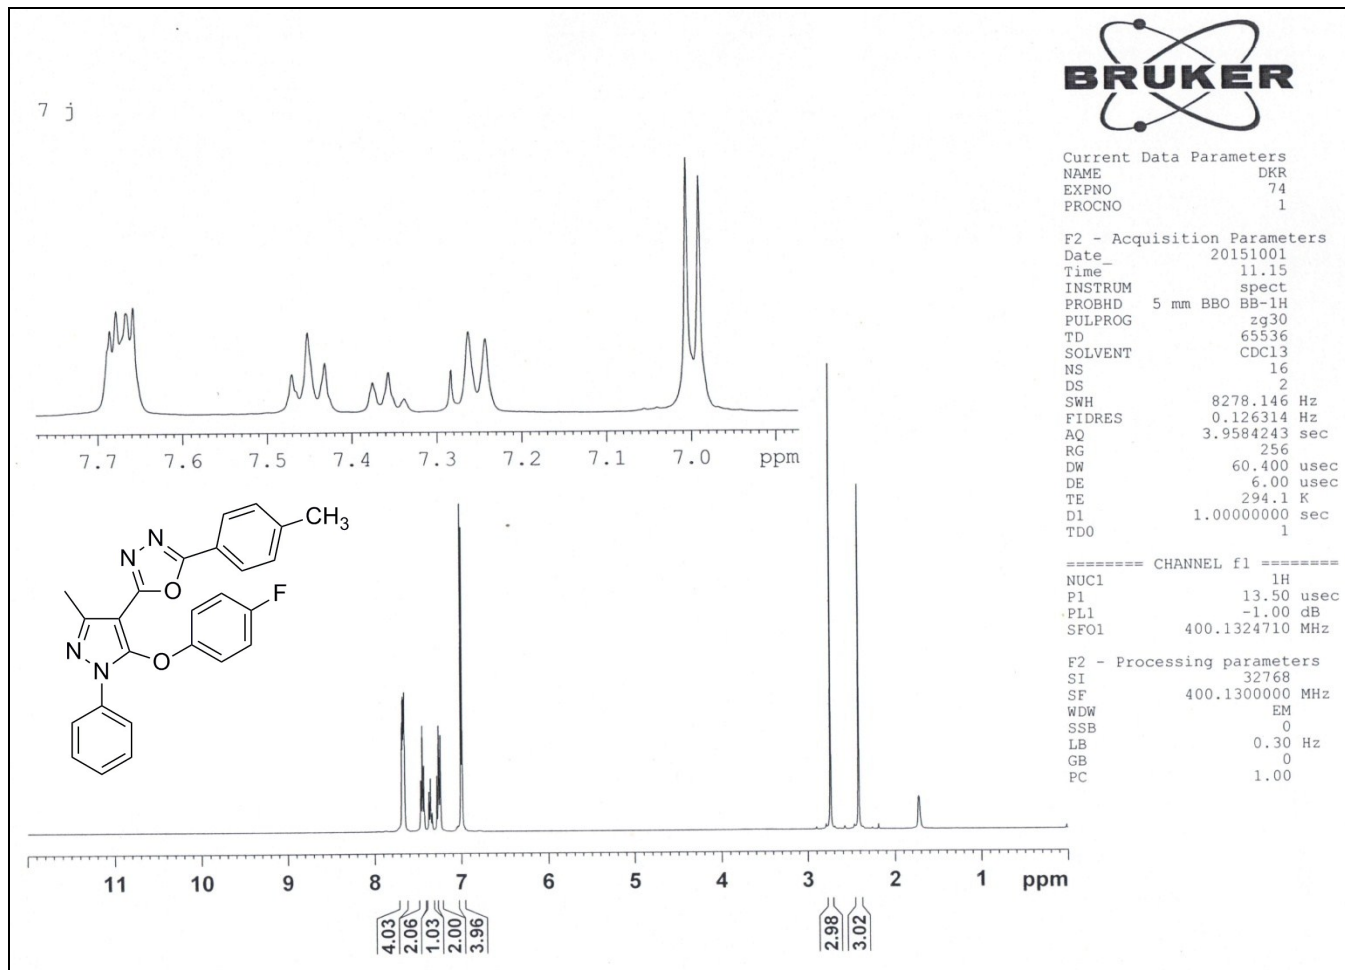

<sup>1</sup>H NMR spectra of compound 7k

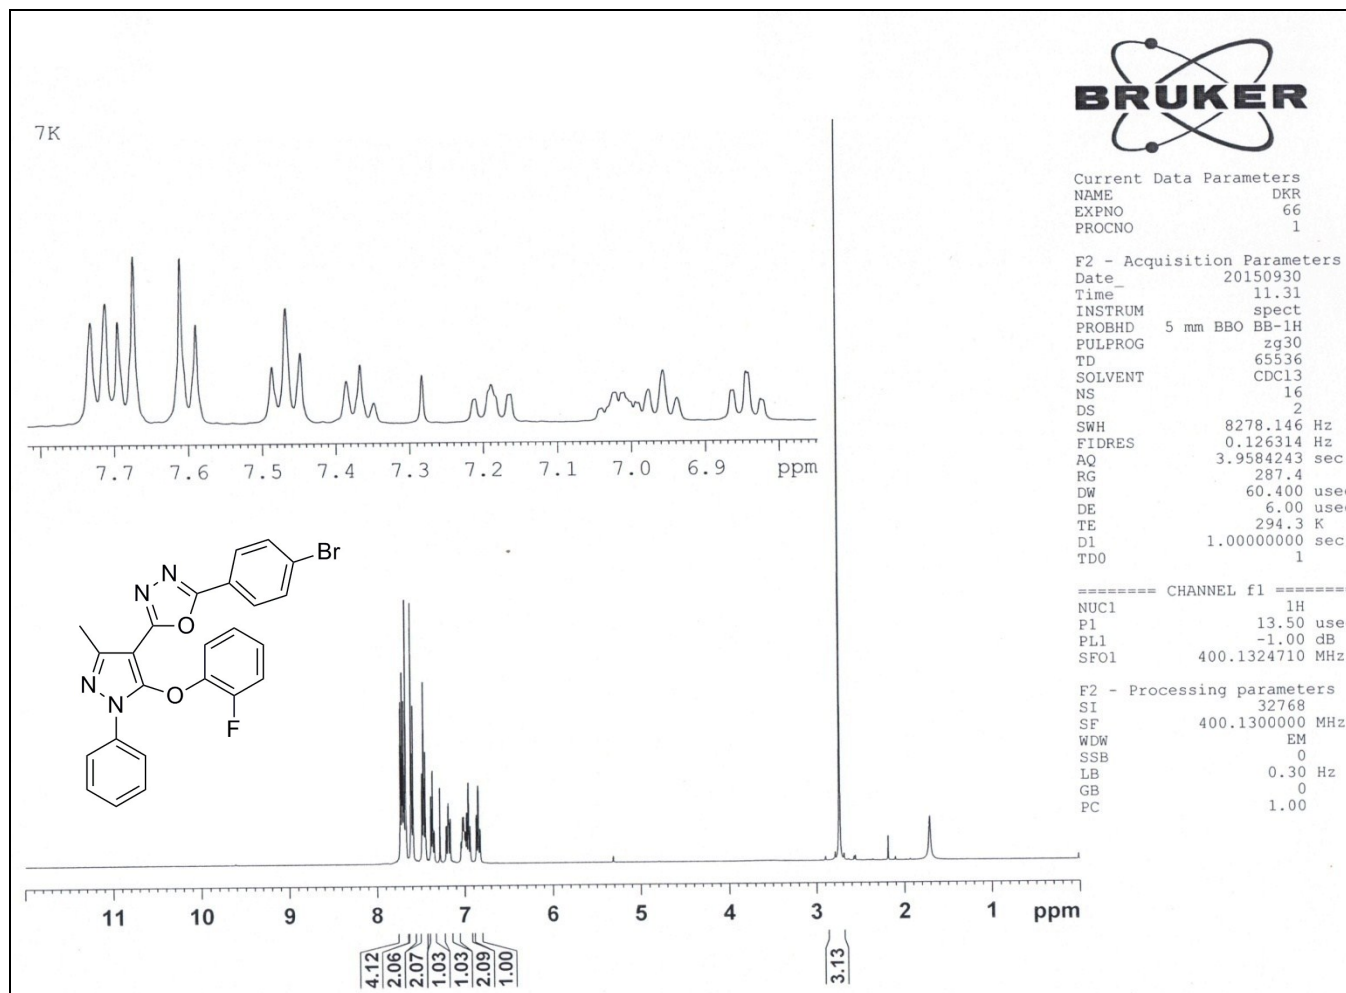

<sup>1</sup>H NMR spectra of compound 71

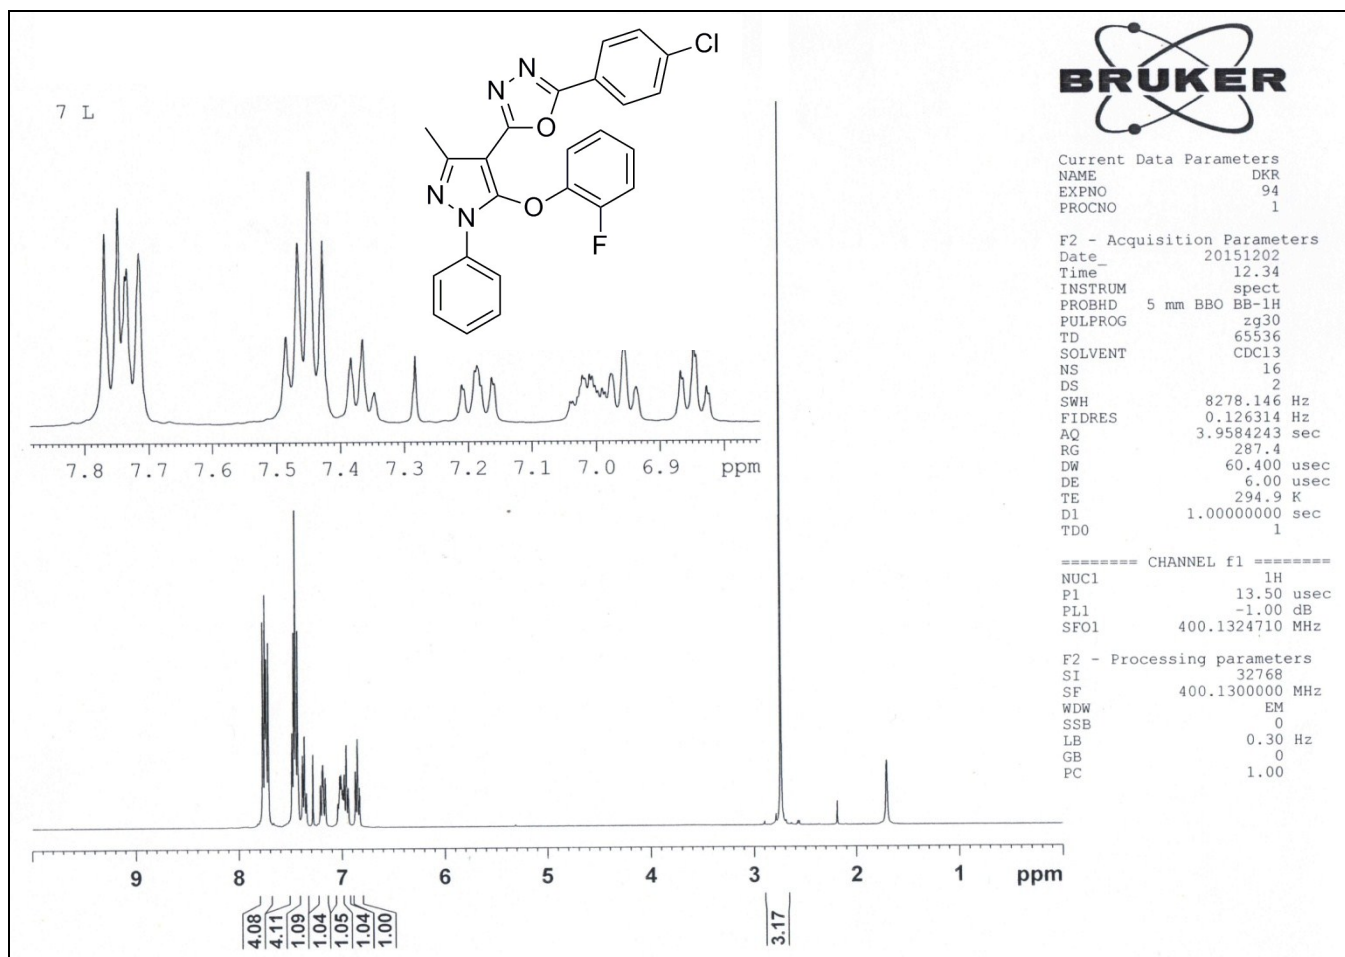



<sup>1</sup>H NMR spectra of compound 7m

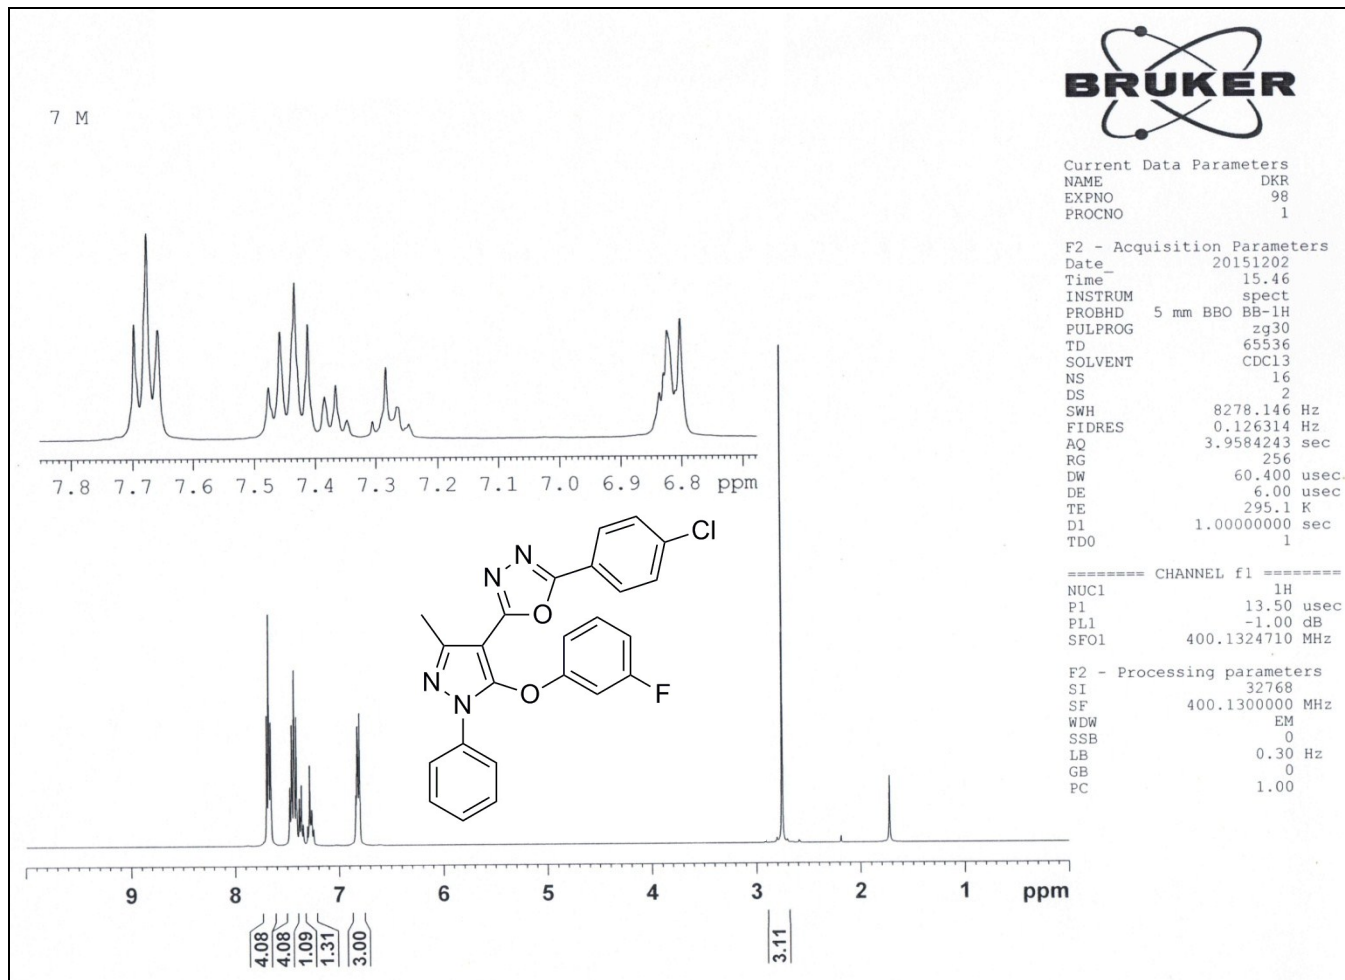



<sup>1</sup>H NMR spectra of compound 7n

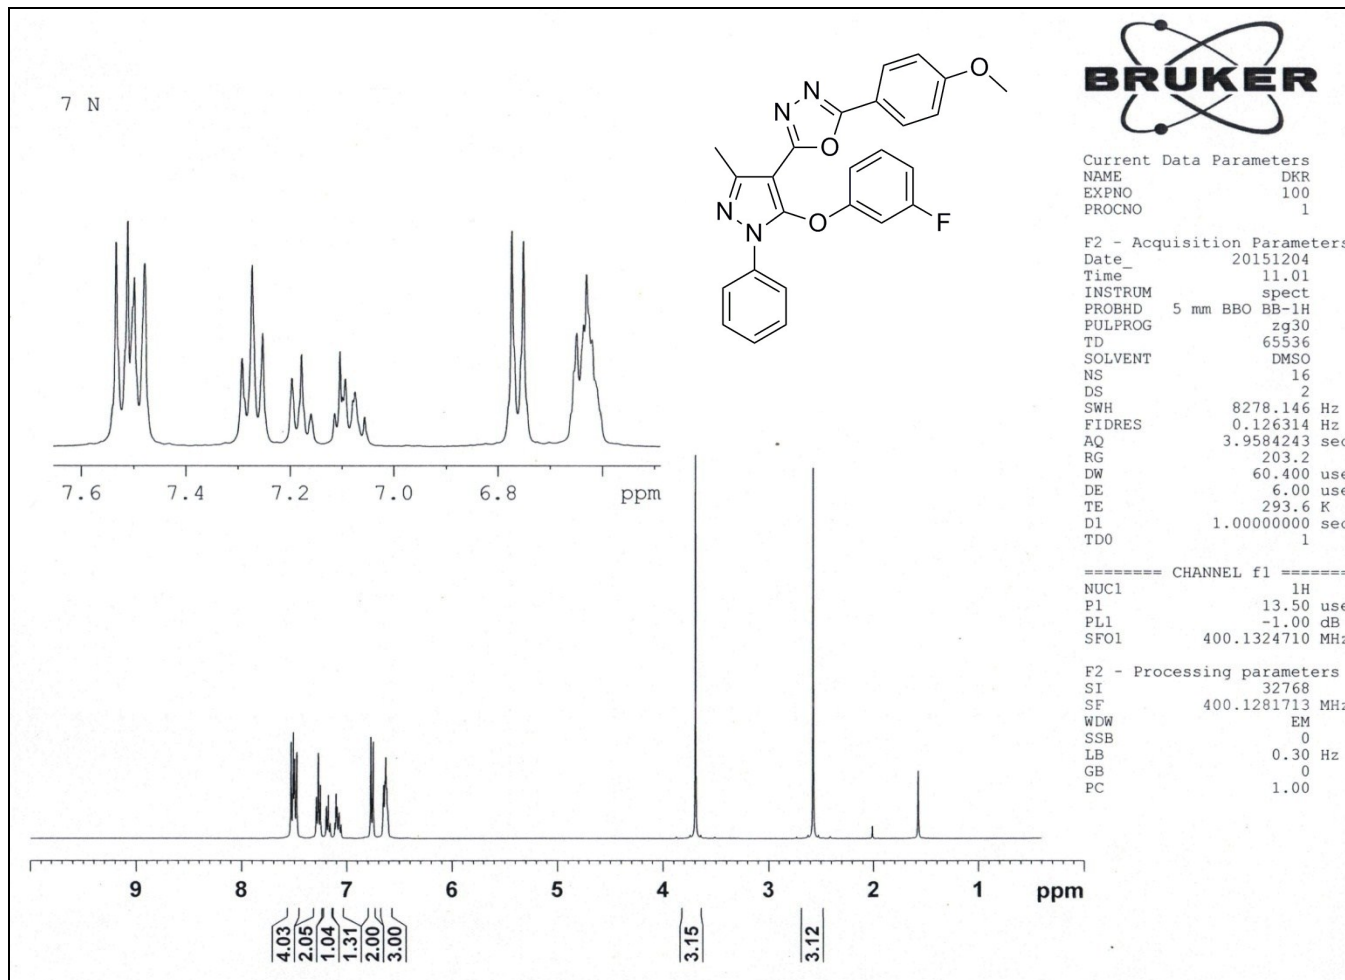

<sup>1</sup>H NMR spectra of compound **7o**

7 o

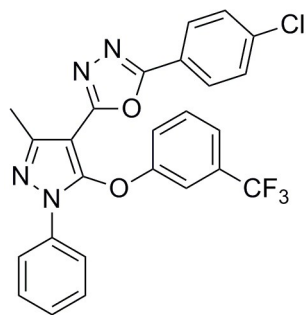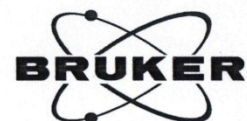

Current Data Parameters  
NAME DKR  
EXPNO 92  
PROCNO 1

F2 - Acquisition Parameters  
Date\_ 20151201  
Time 16.35  
INSTRUM spect  
PROBHD 5 mm BBO BB-1H  
PULPROG zg30  
TD 65536  
SOLVENT CDCl3  
NS 16  
DS 2  
SWH 8278.146 Hz  
FIDRES 0.126314 Hz  
AQ 3.9584243 sec  
RG 1024  
DW 60.400 usec  
DE 6.00 usec  
TE 294.7 K  
D1 1.00000000 sec  
TD0 1

----- CHANNEL f1 -----  
NUC1 1H  
P1 13.50 usec  
PL1 -1.00 dB  
SFO1 400.1324710 MHz

F2 - Processing parameters  
SI 32768  
SF 400.1300000 MHz  
WDW EM  
SSB 0  
LB 0.30 Hz  
GB 0  
PC 1.00

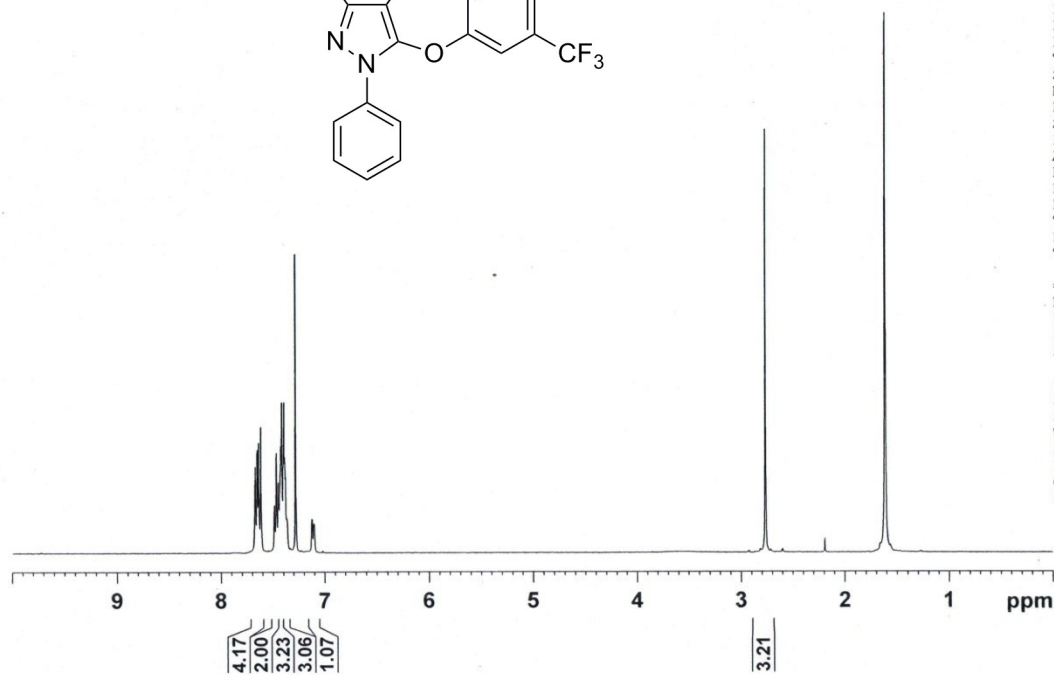

<sup>1</sup>H NMR spectra of compound 7p

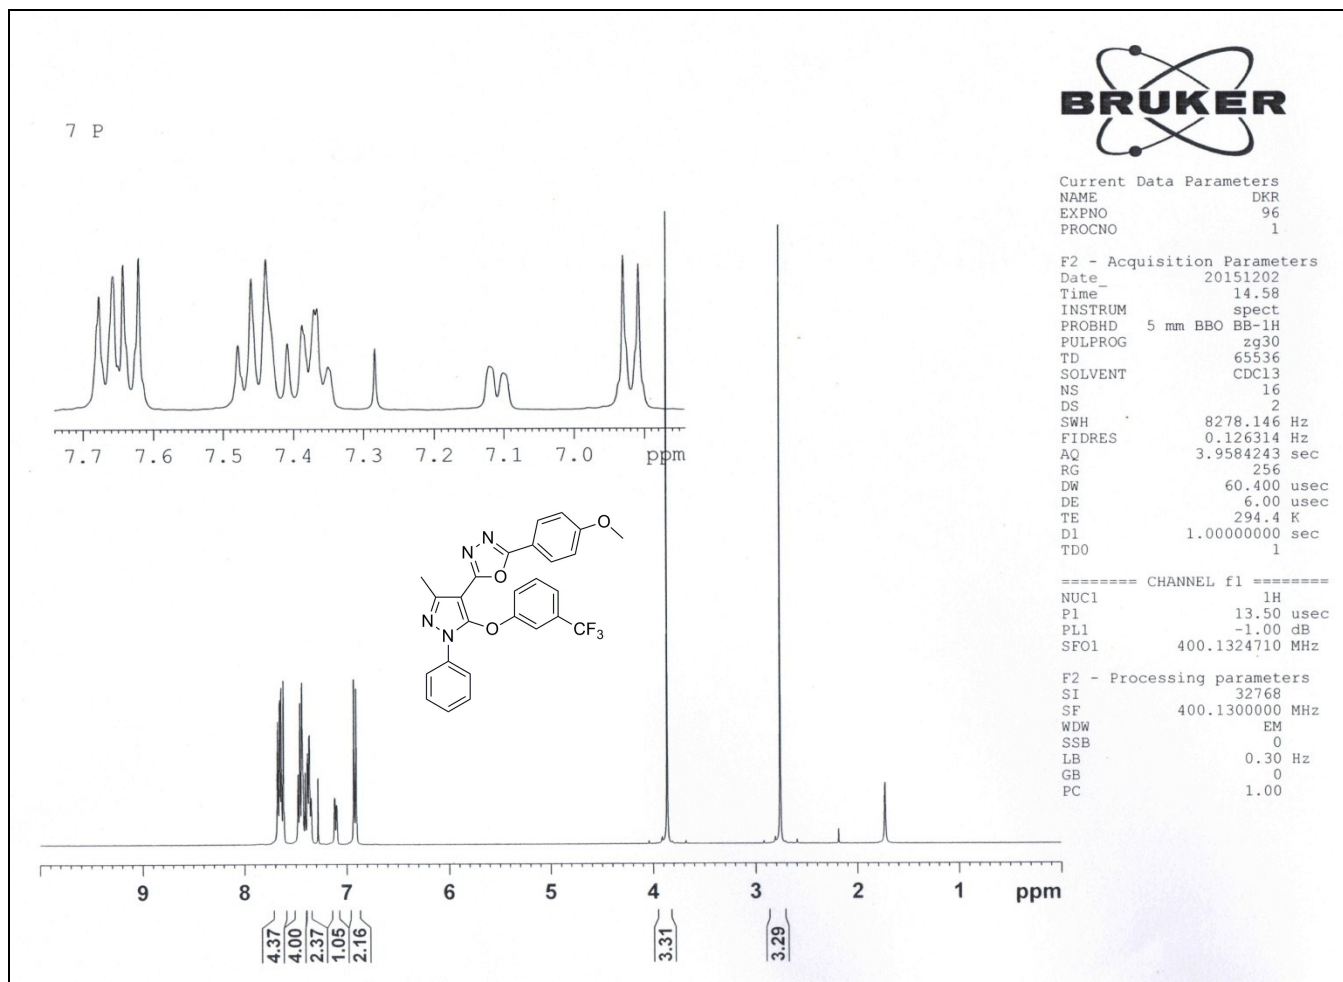

<sup>13</sup>C APT (Attached Proton Test) spectra of compound **7a**

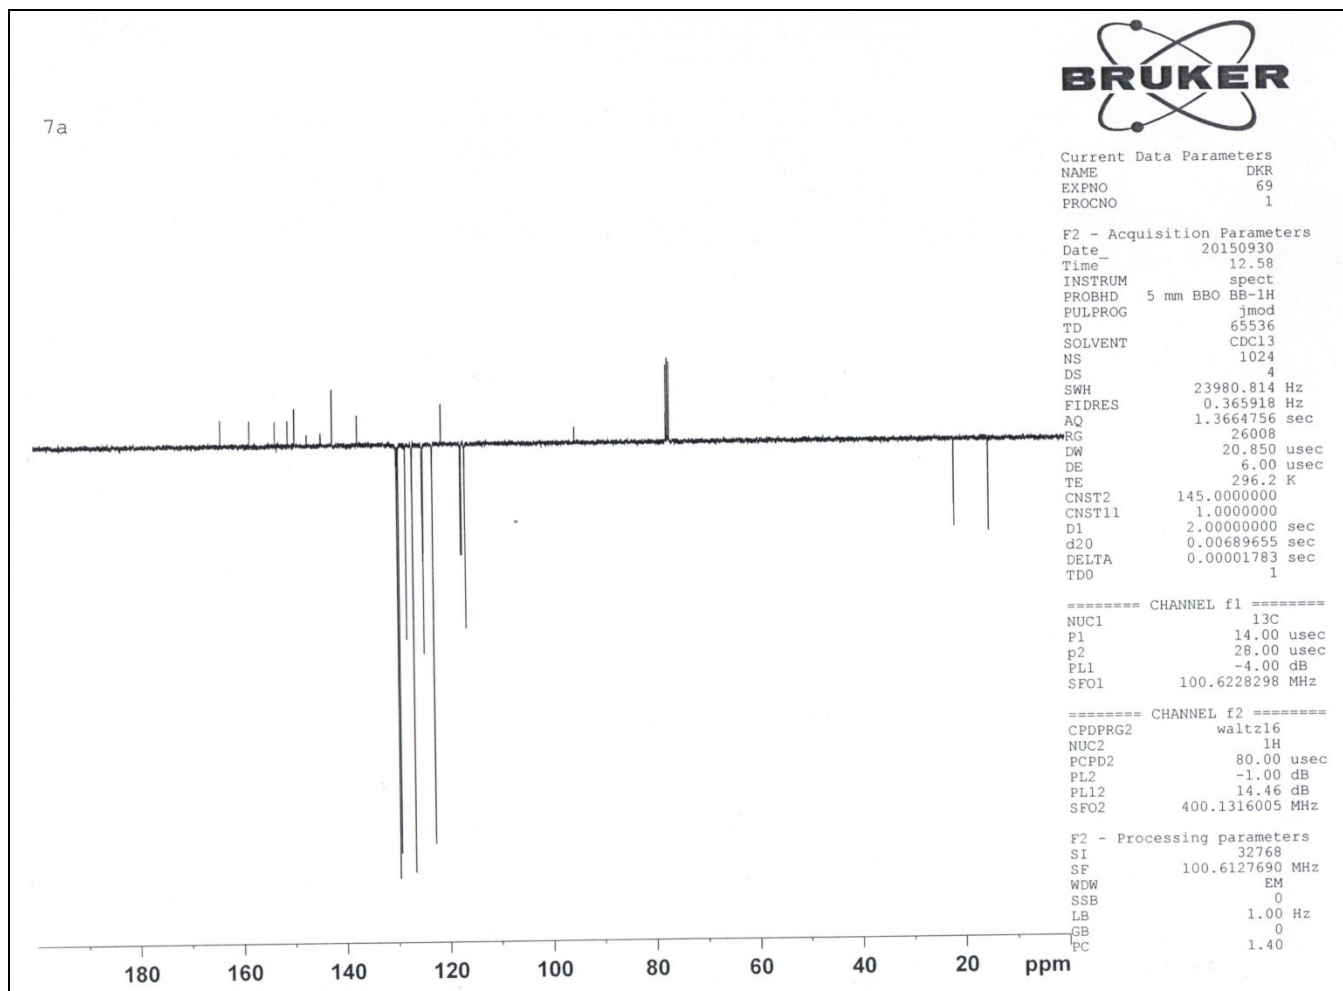

<sup>13</sup>C APT (Attached Proton Test) spectra of compound **7b**

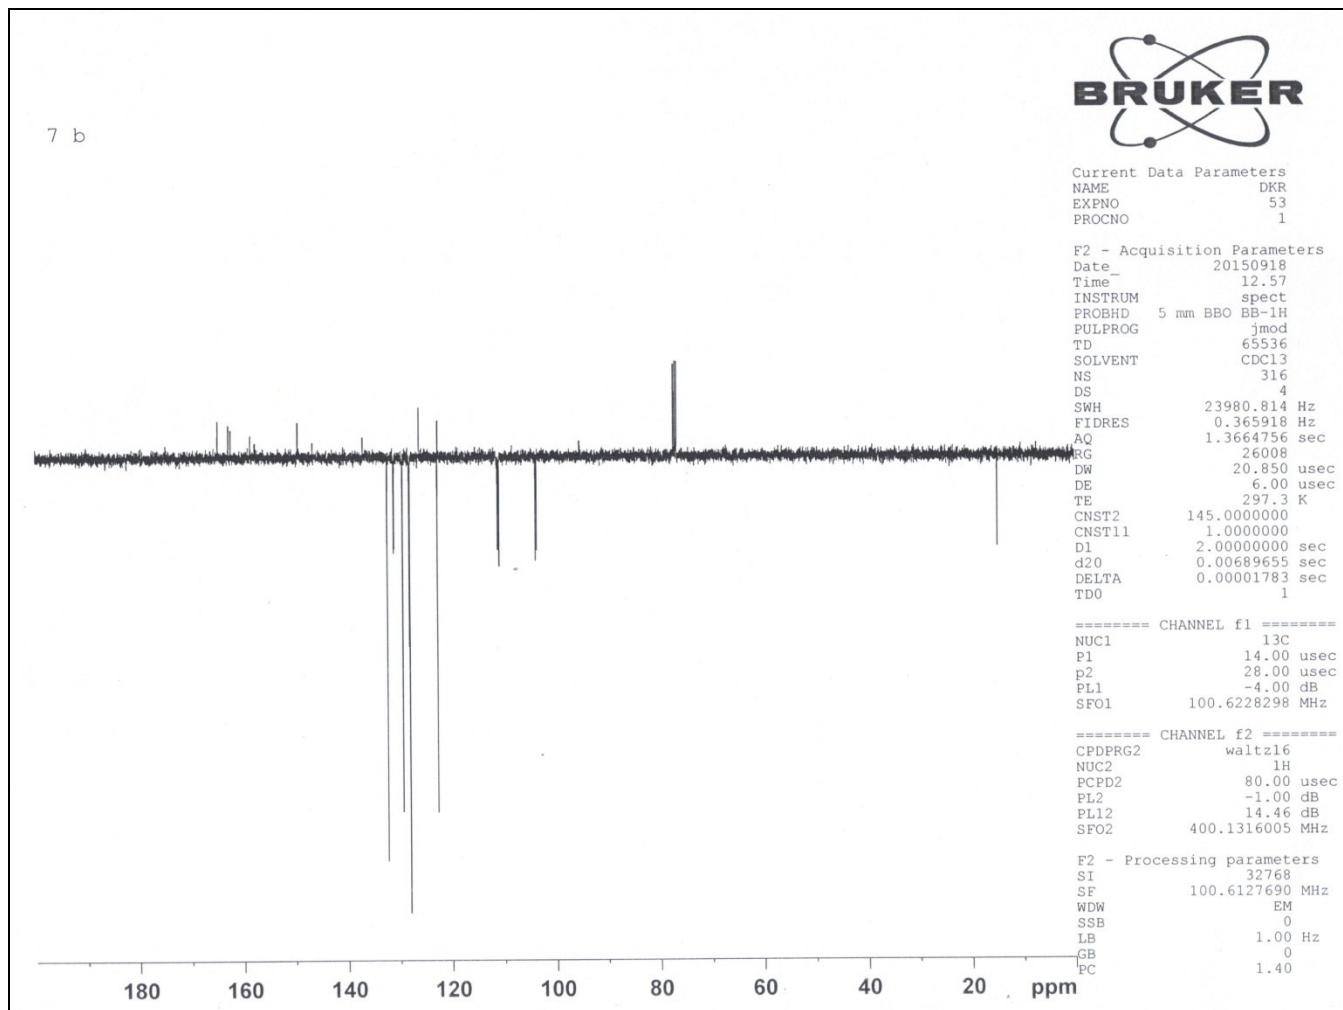

<sup>13</sup>C APT (Attached Proton Test) spectra of compound 7c

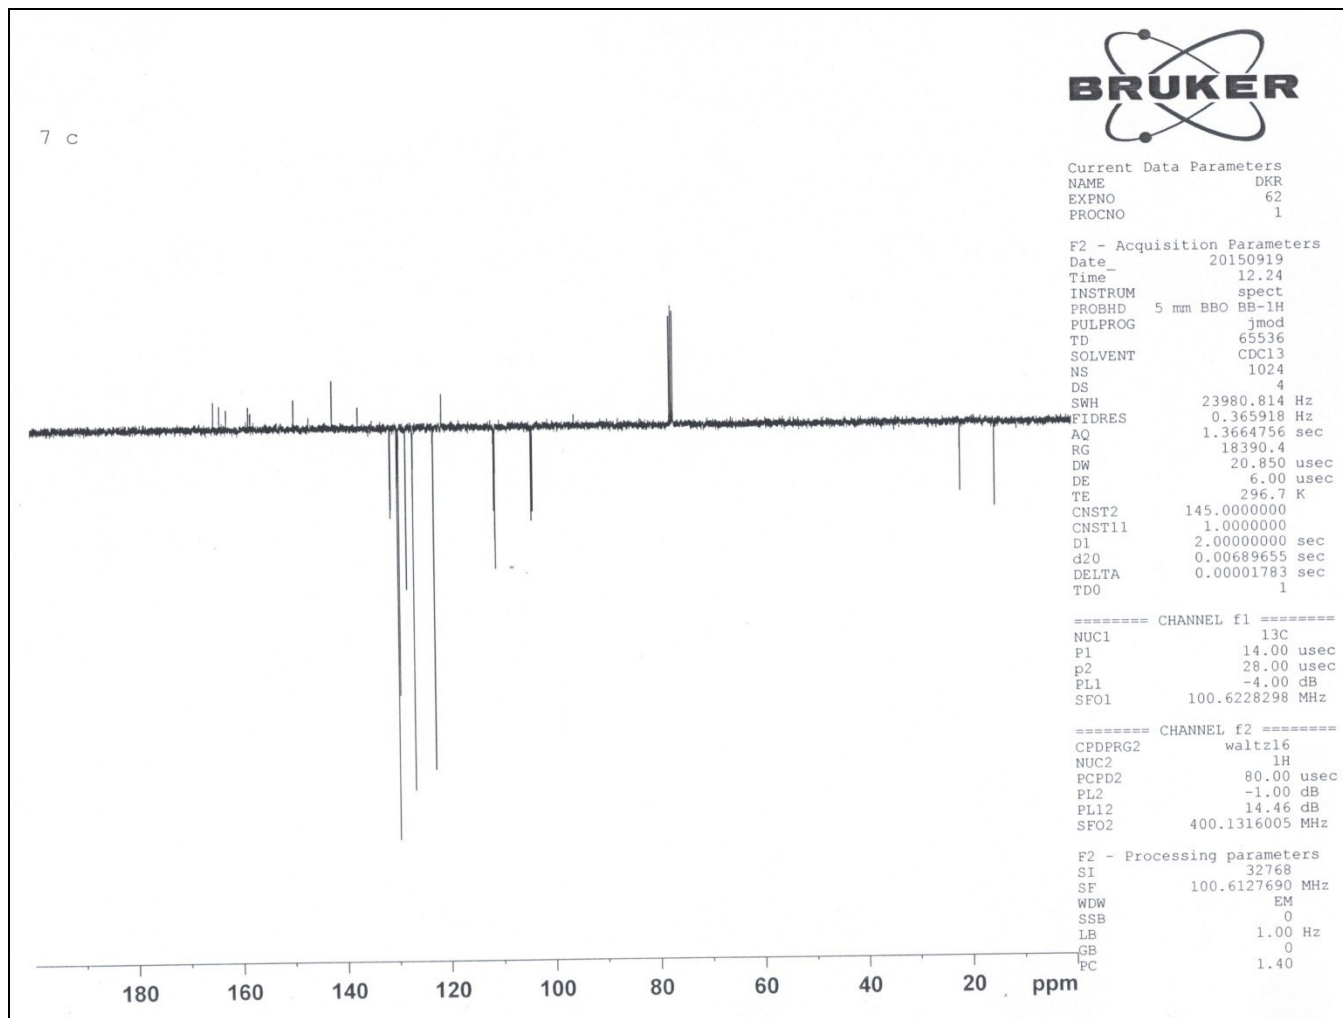

<sup>13</sup>C APT (Attached Proton Test) spectra of compound **7d**

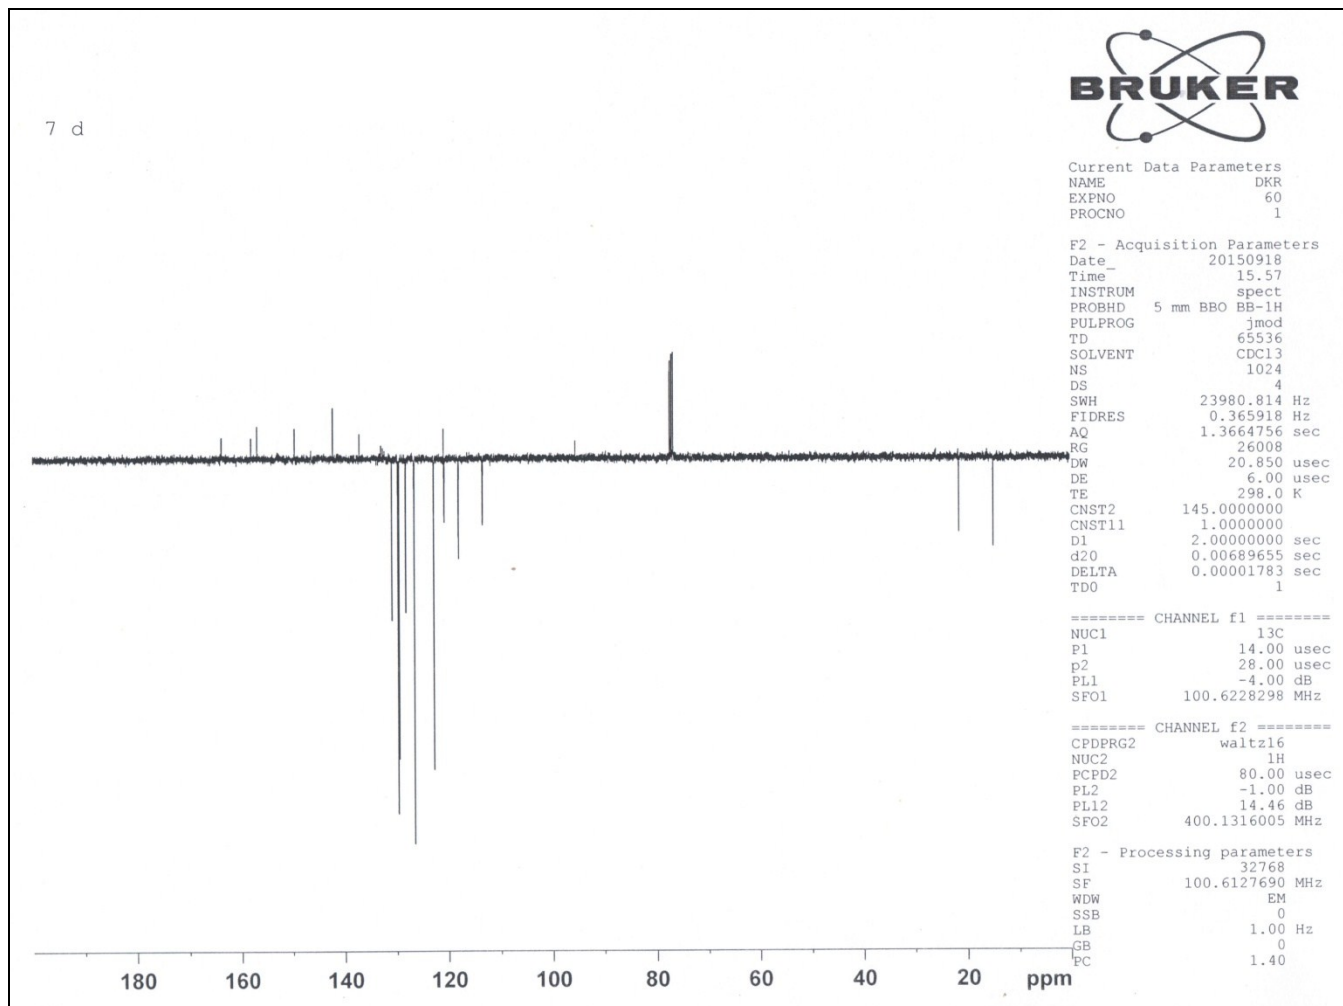

<sup>13</sup>C APT (Attached Proton Test) spectra of compound 7e

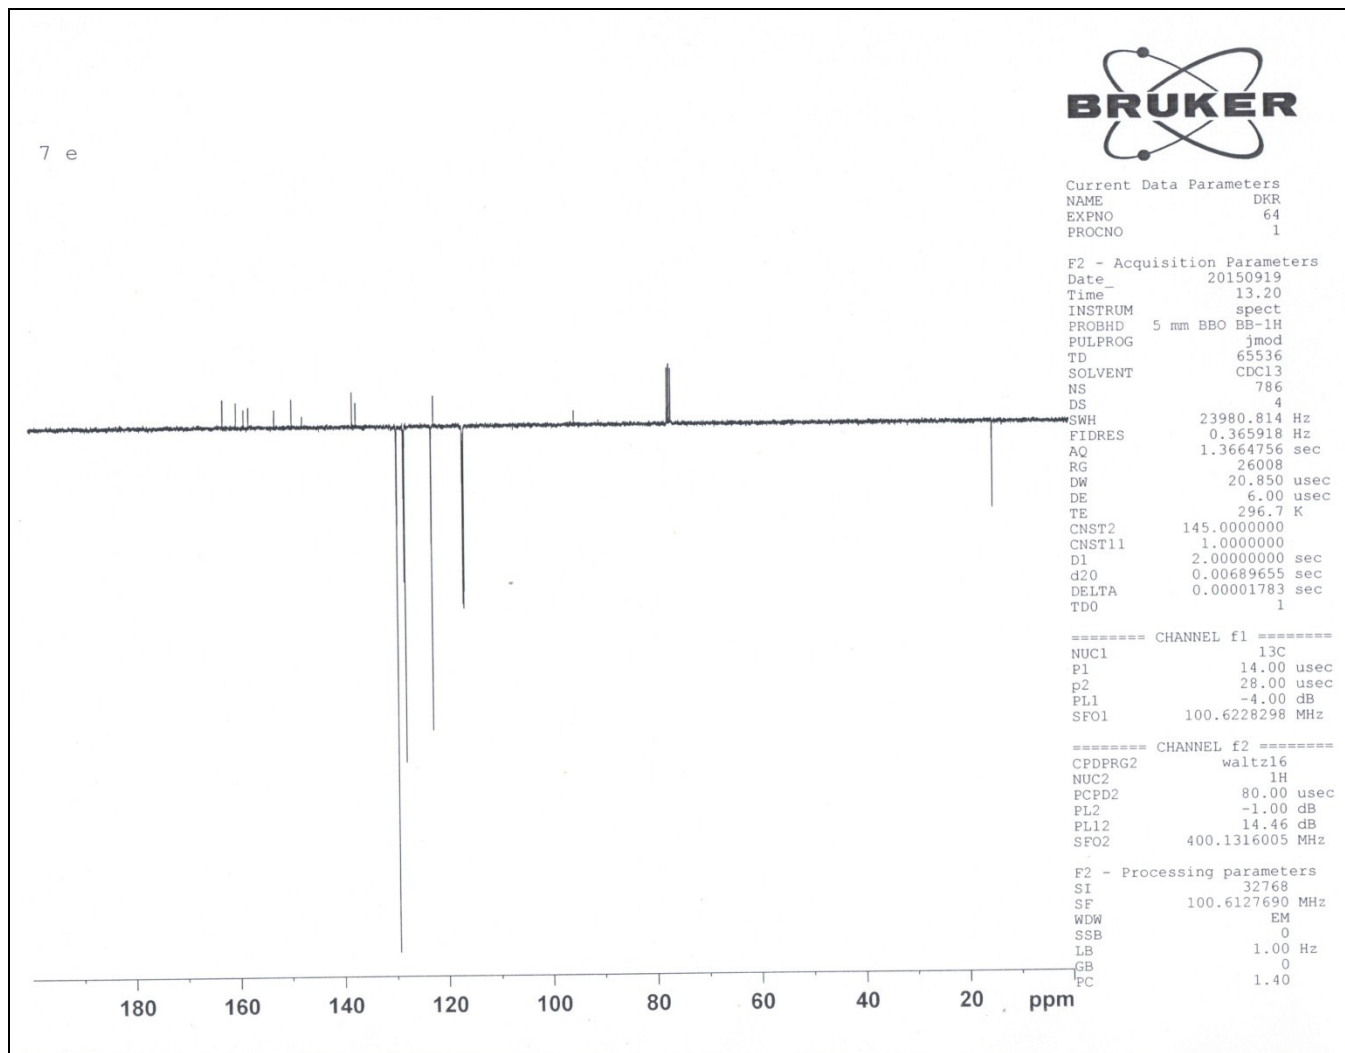



<sup>13</sup>C APT (Attached Proton Test) spectra of compound 7f

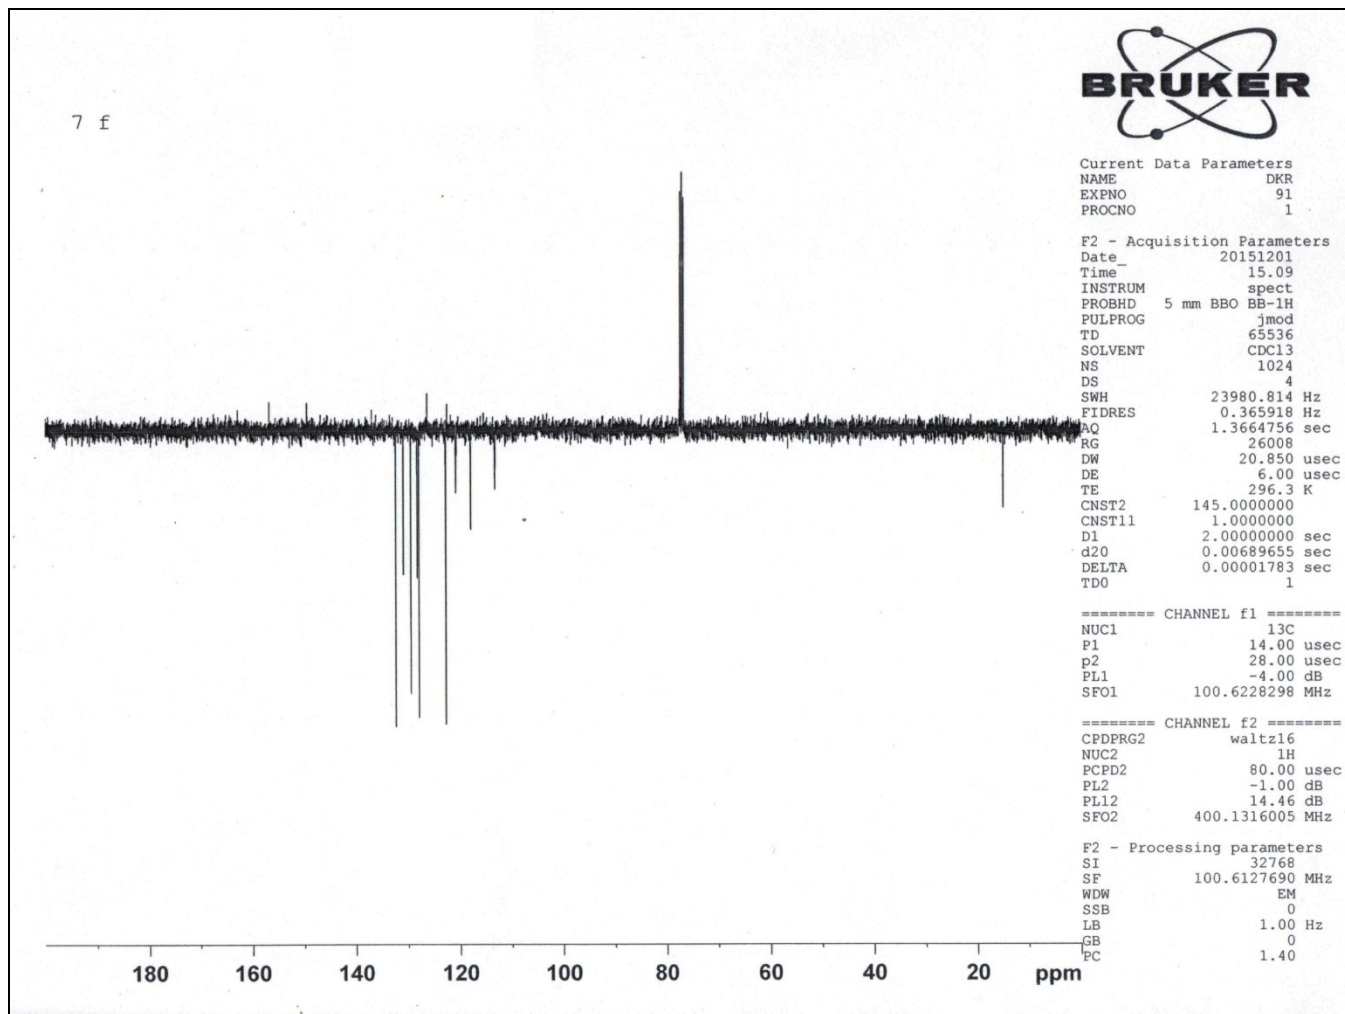

<sup>13</sup>C APT (Attached Proton Test) spectra of compound **7g**

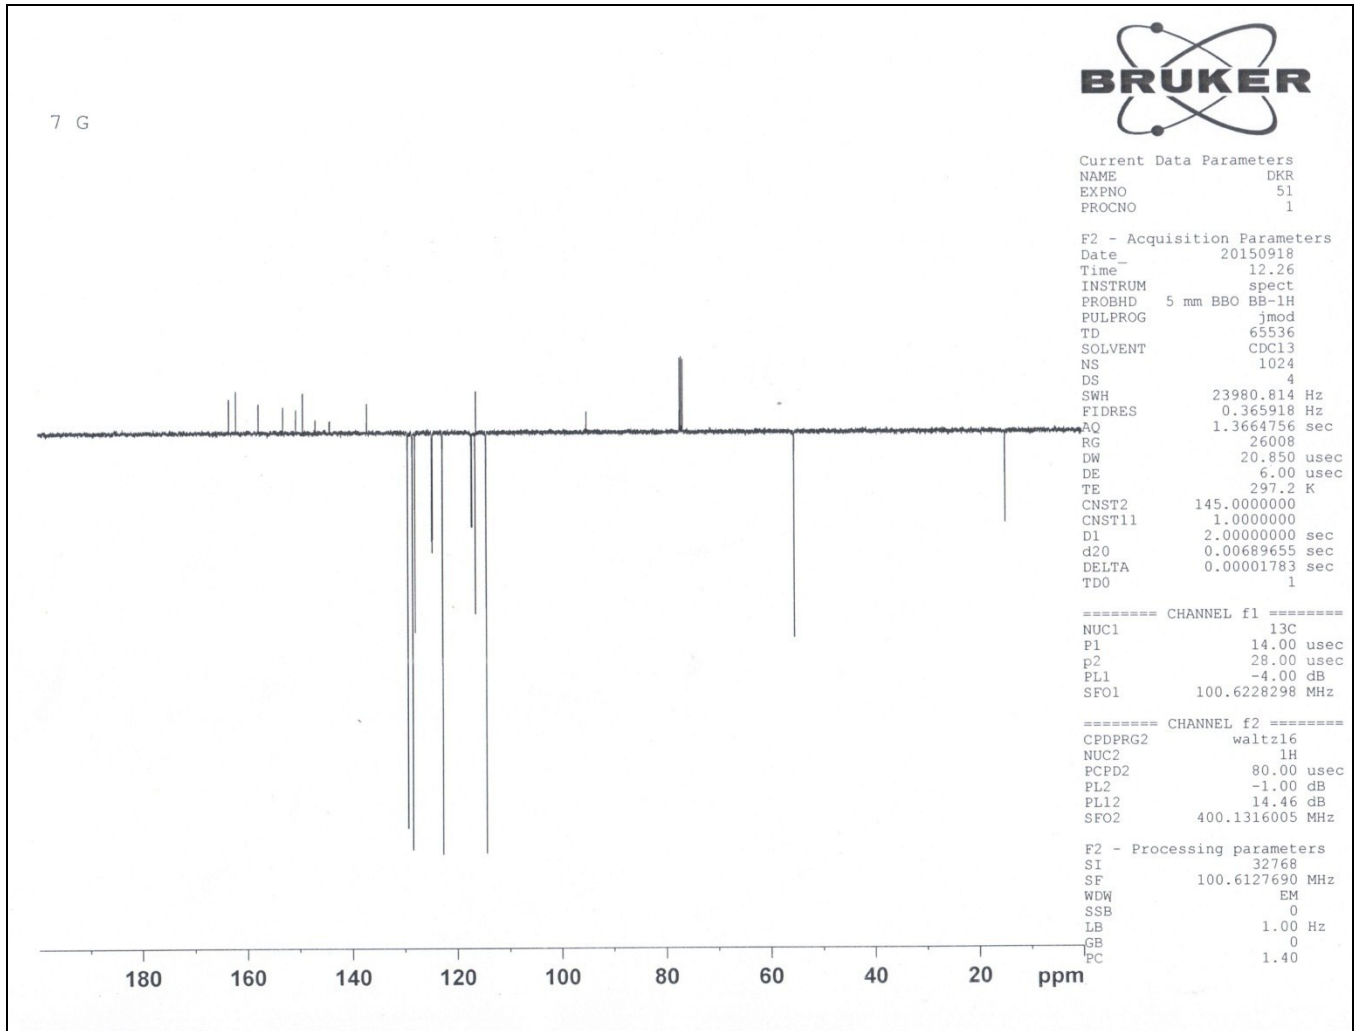

<sup>13</sup>C APT (Attached Proton Test) spectra of compound 7j

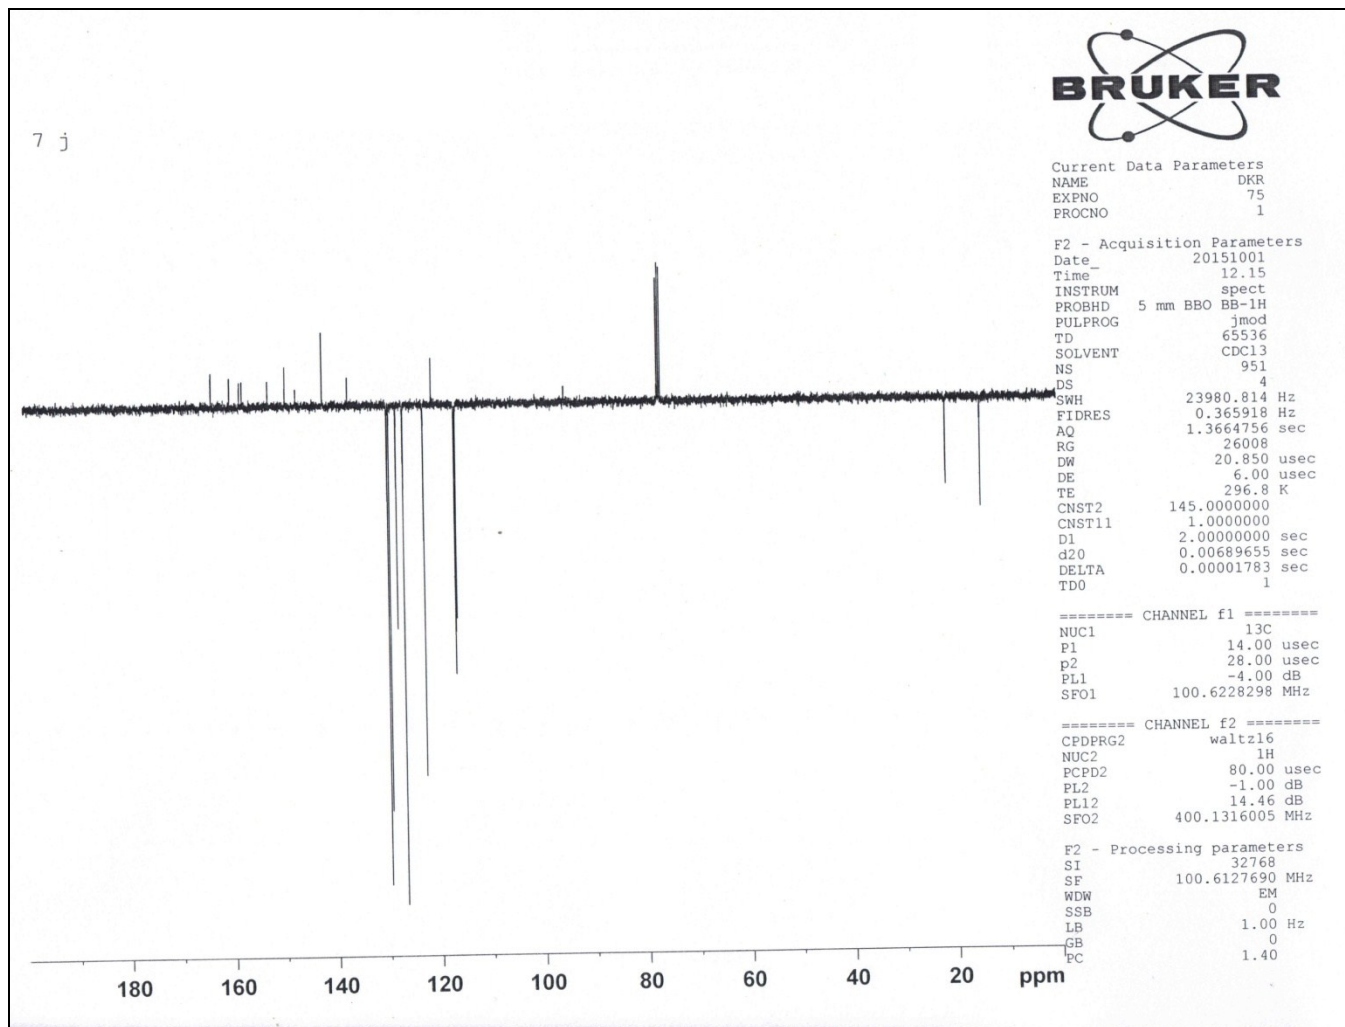

<sup>13</sup>C APT (Attached Proton Test) spectra of compound **7k**

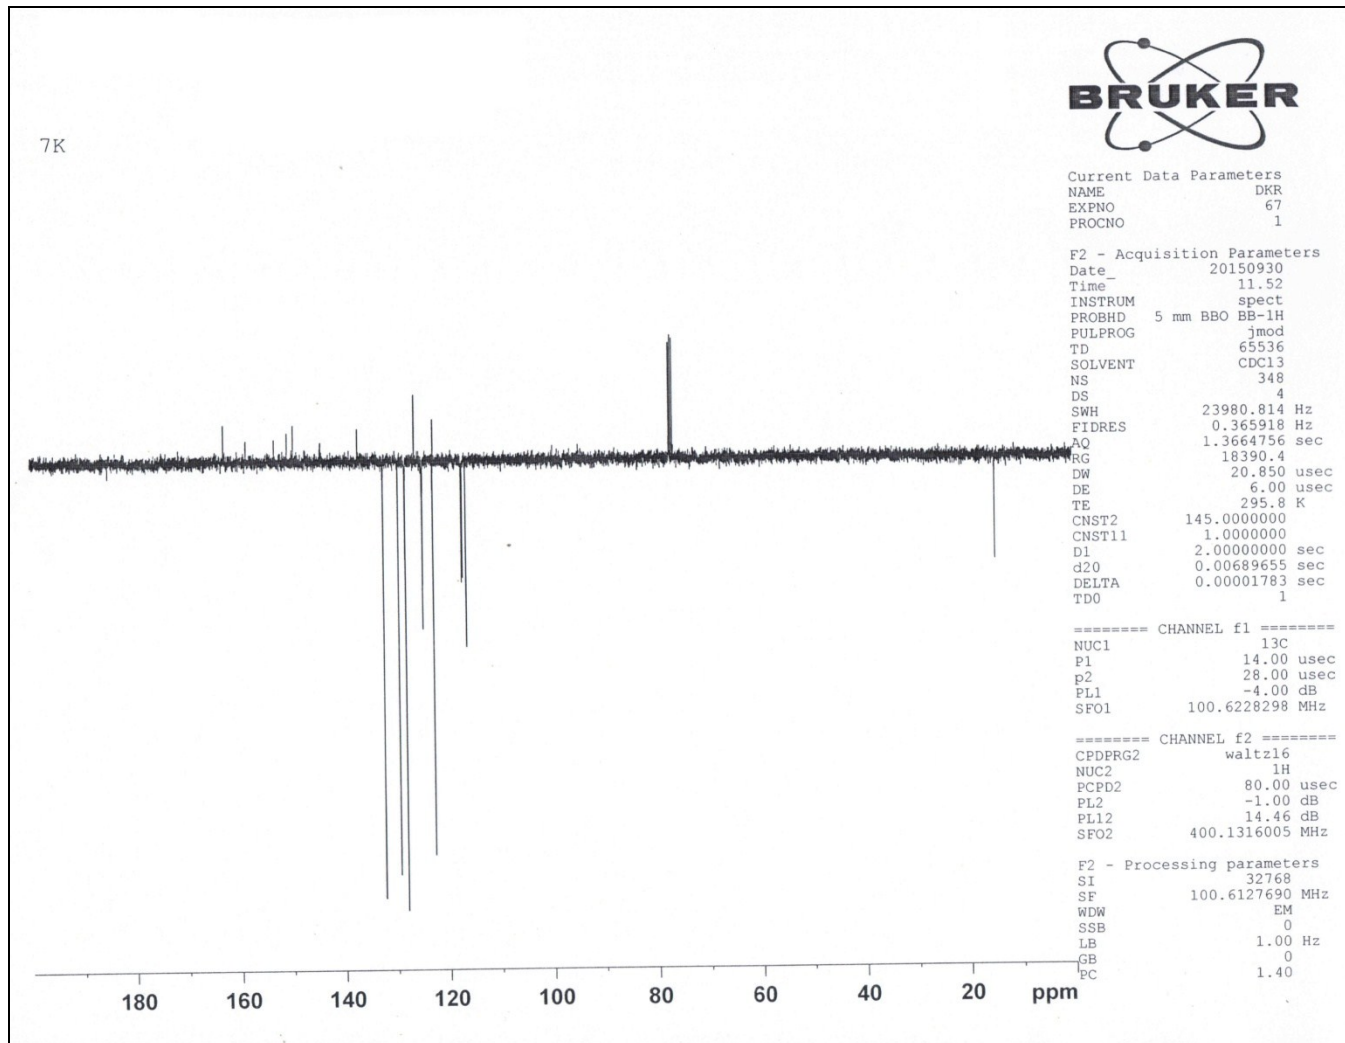

<sup>13</sup>C APT (Attached Proton Test) spectra of compound 7I

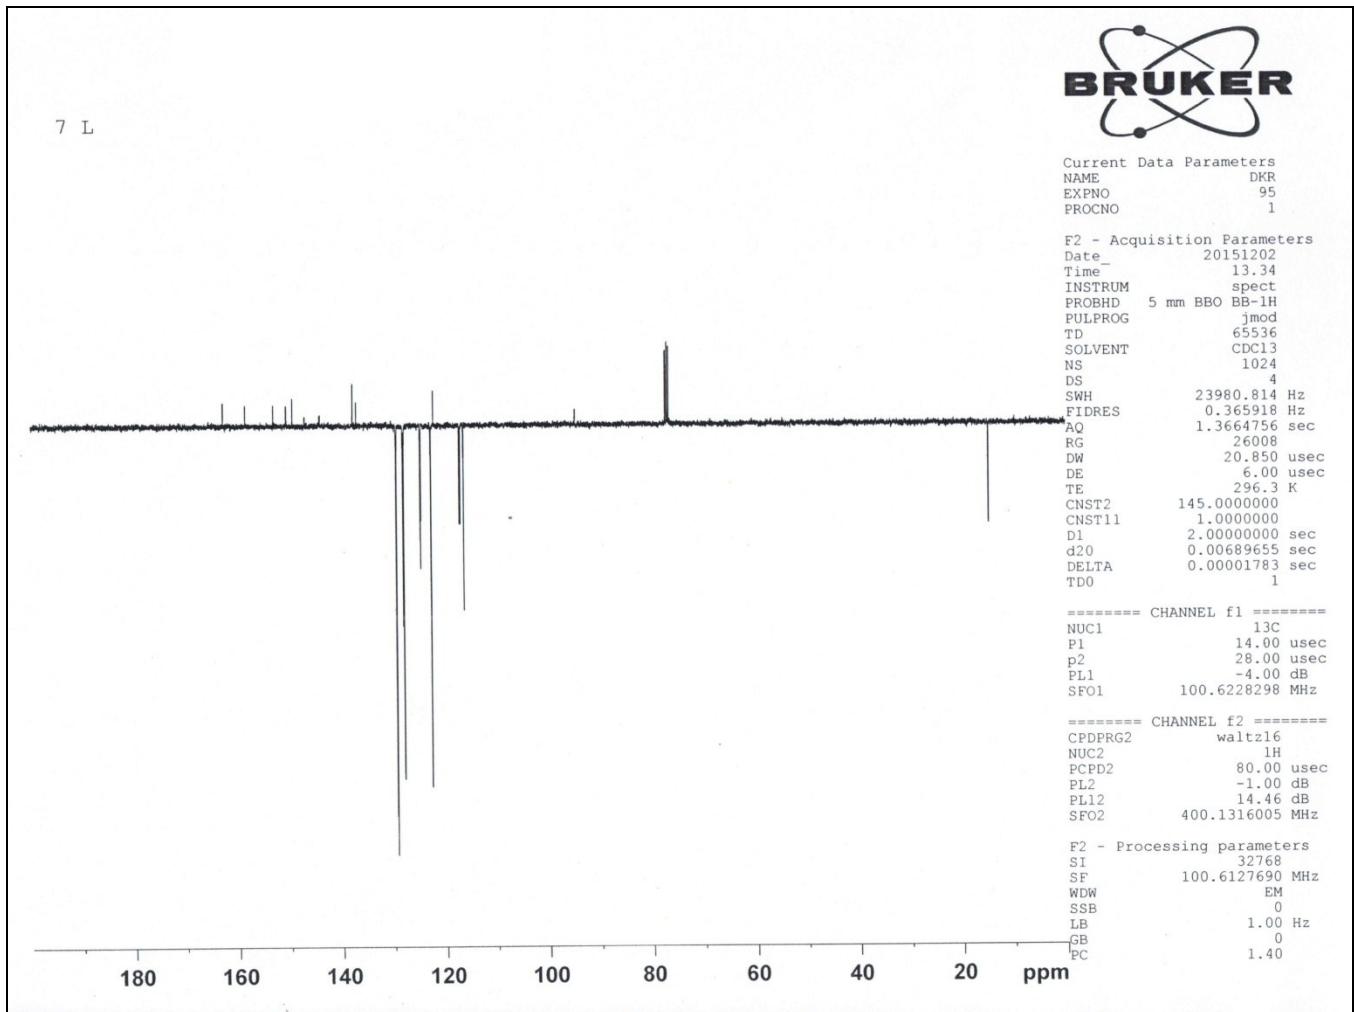

<sup>13</sup>C APT (Attached Proton Test) spectra of compound 7m

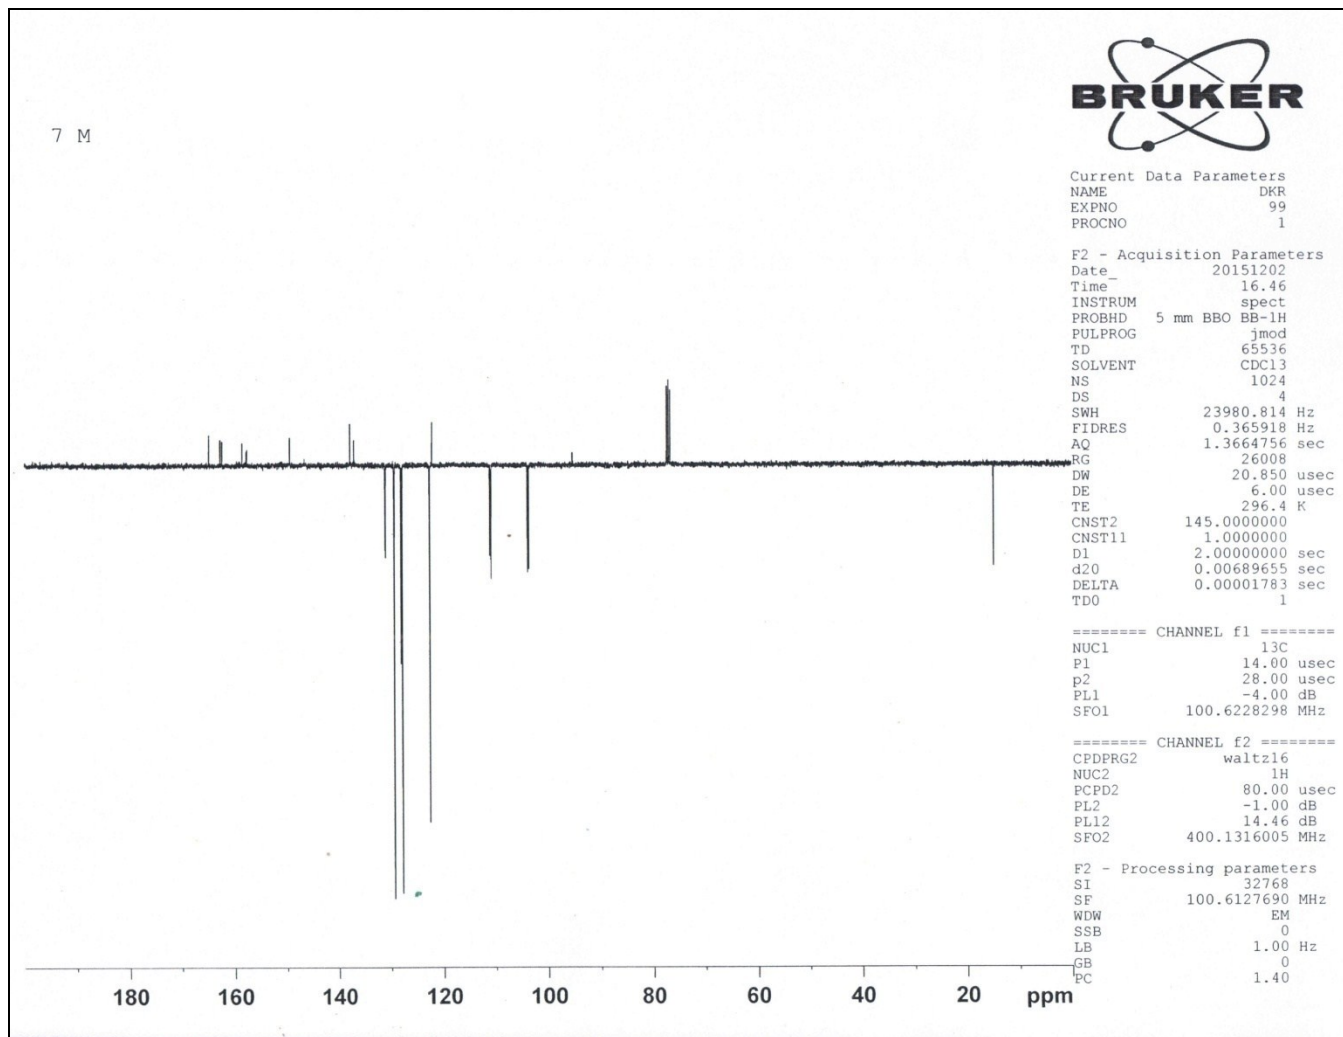

<sup>13</sup>C APT (Attached Proton Test) spectra of compound **7n**

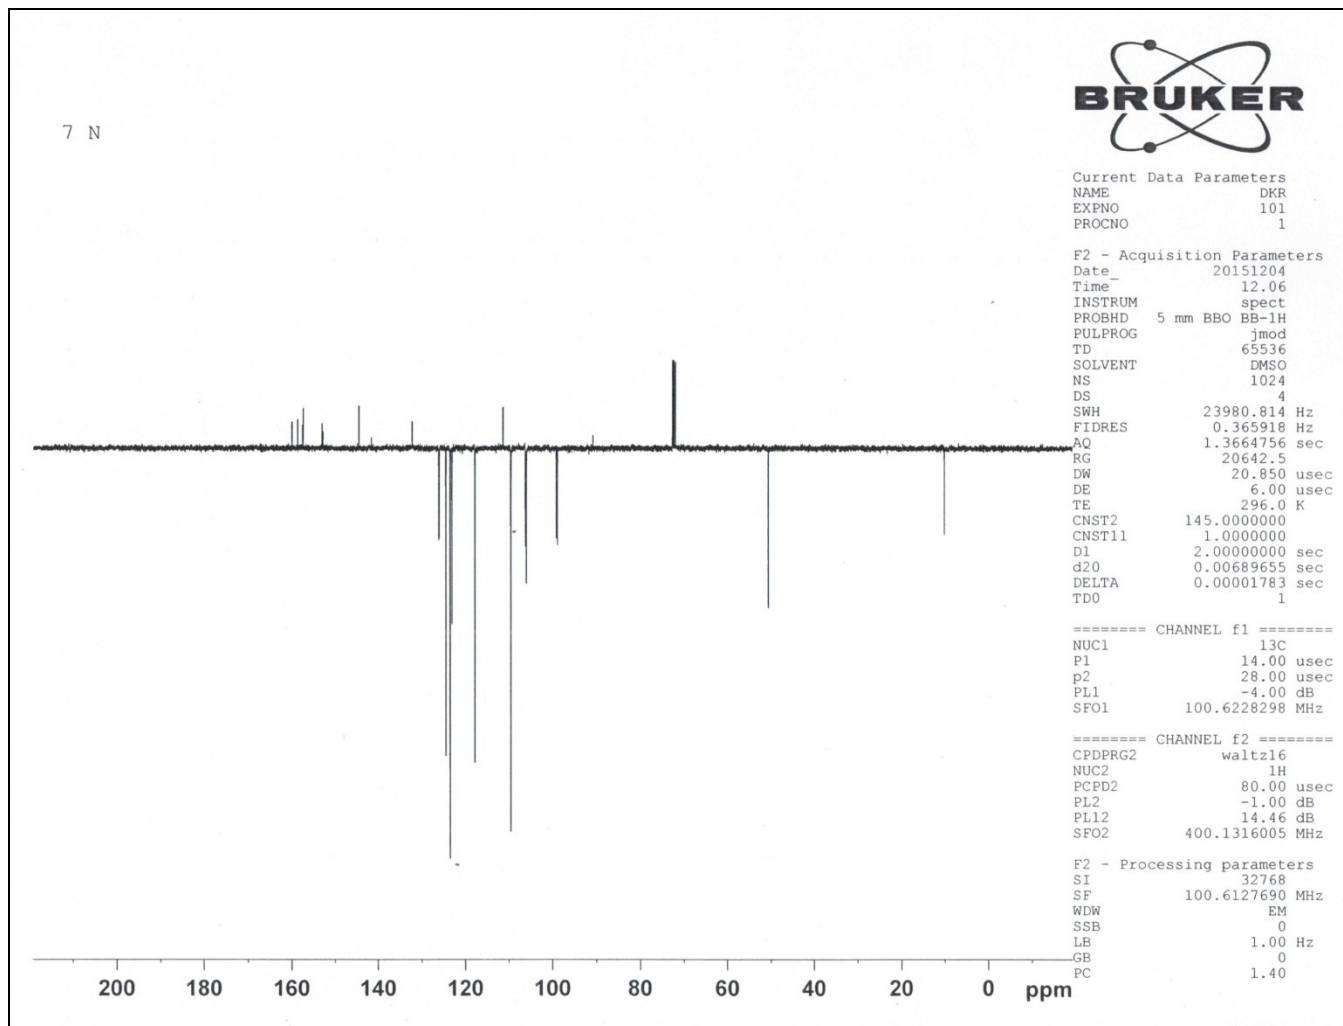



<sup>13</sup>C APT (Attached Proton Test) spectra of compound **7o**

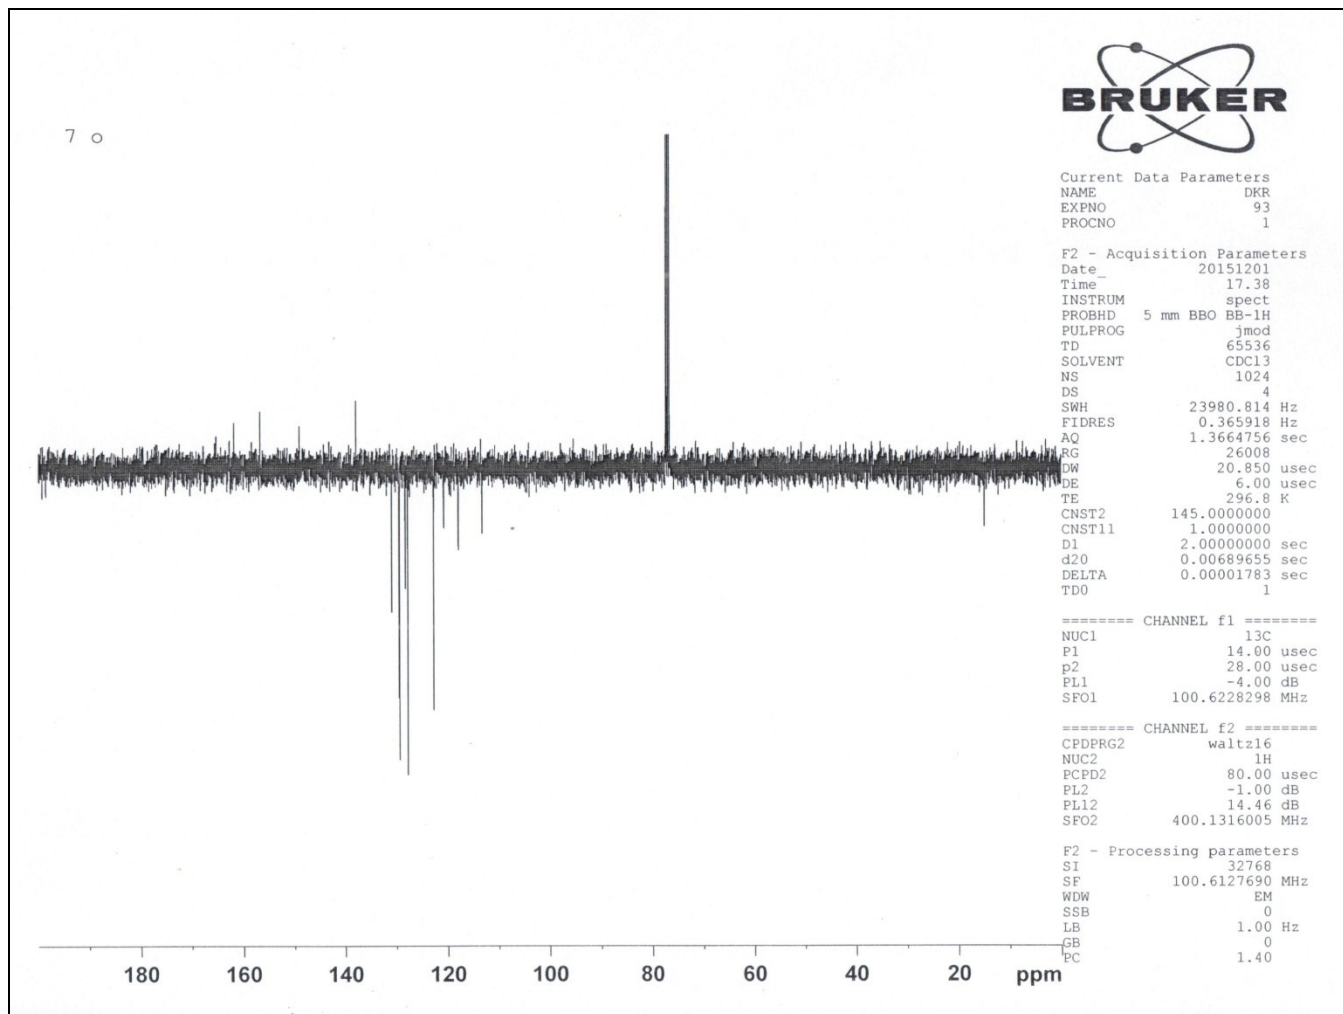



<sup>13</sup>C APT (Attached Proton Test) spectra of compound 7p

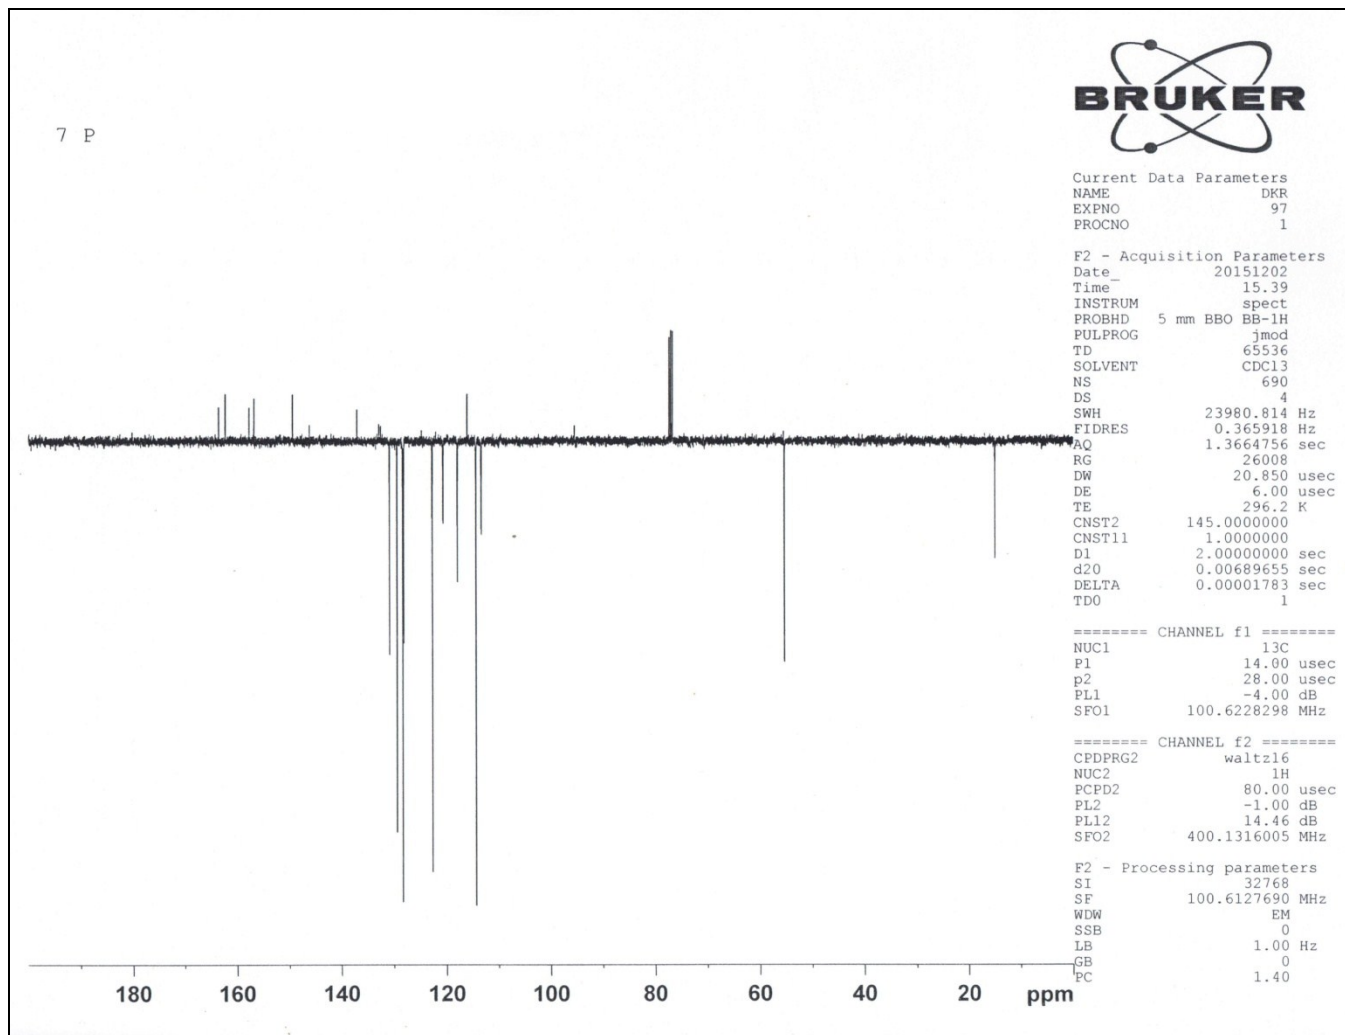

<sup>1</sup>H NMR spectra of compound 4a

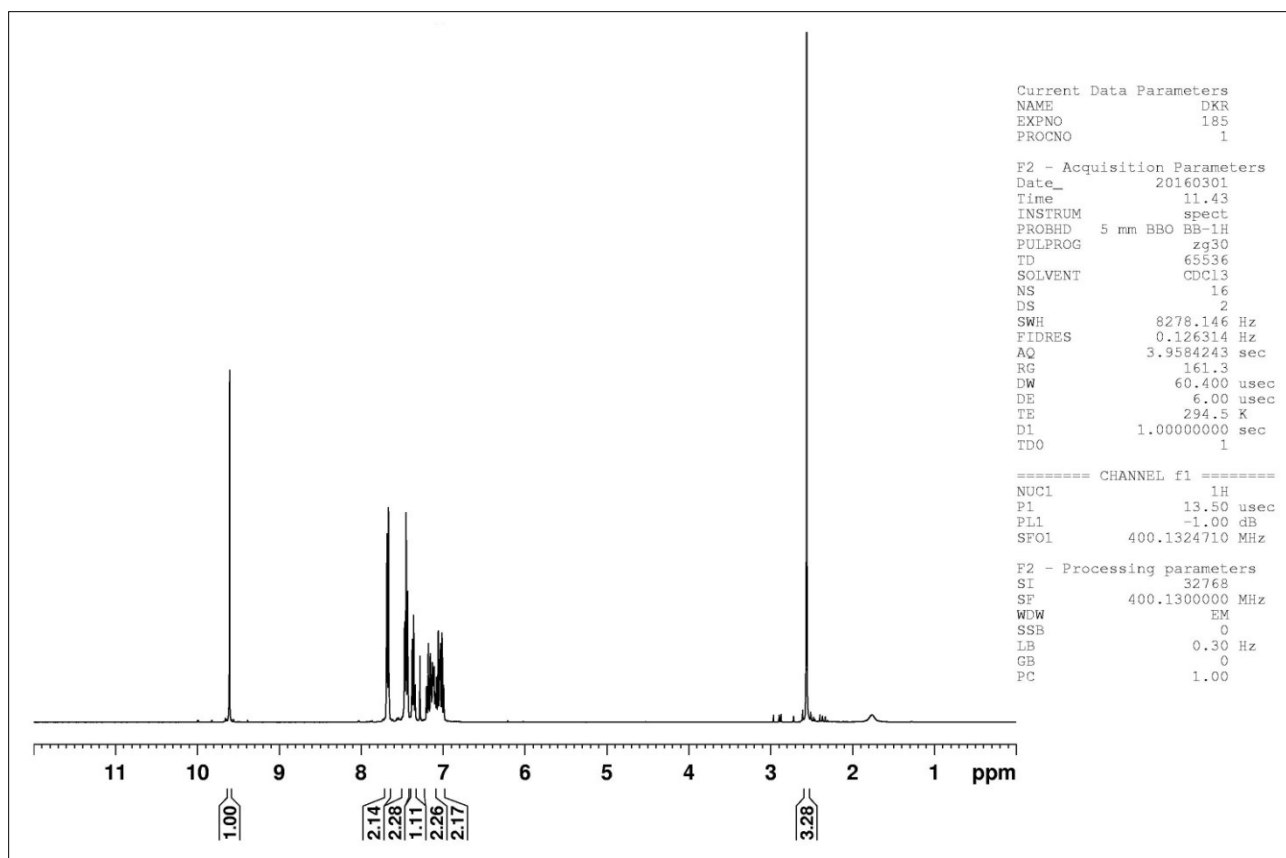

<sup>13</sup>C APT (Attached Proton Test) spectra of compound **4a**

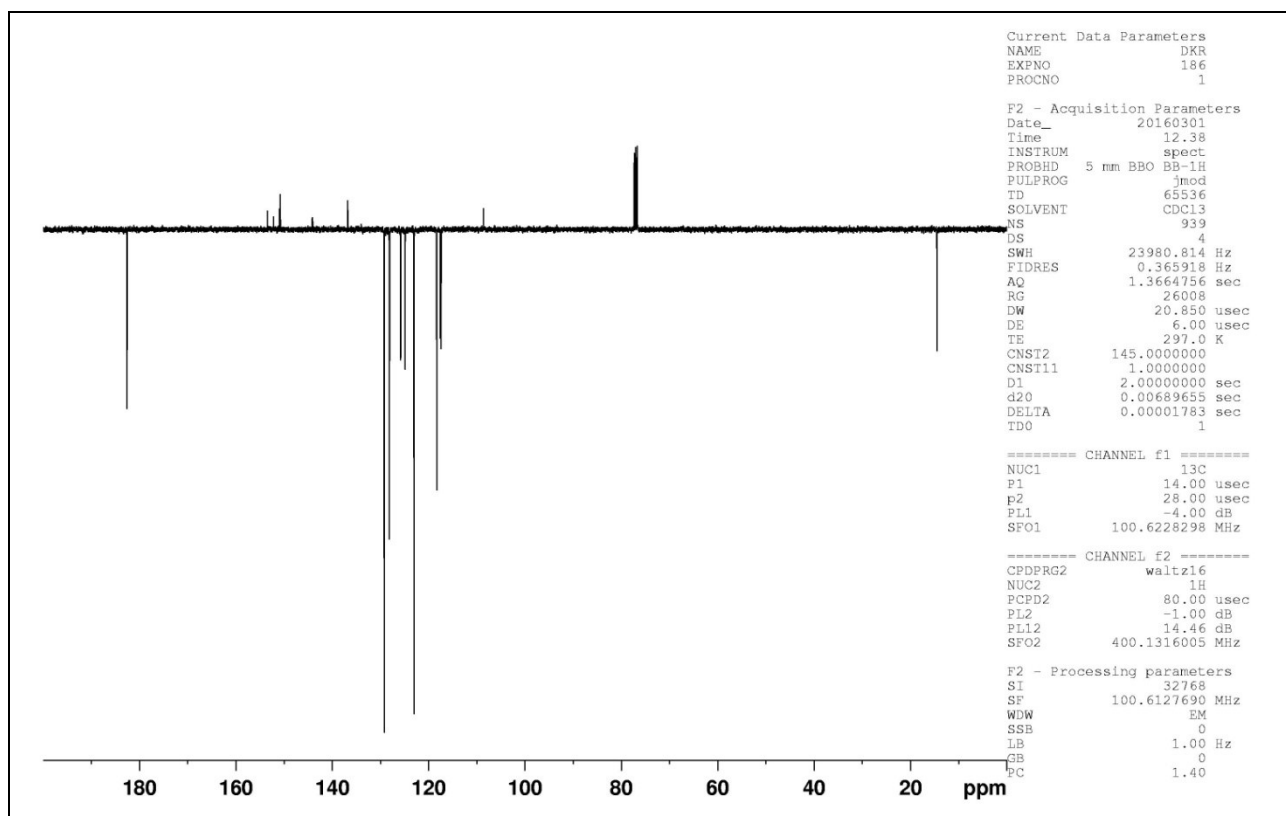

<sup>1</sup>H NMR spectra of compound **4b**

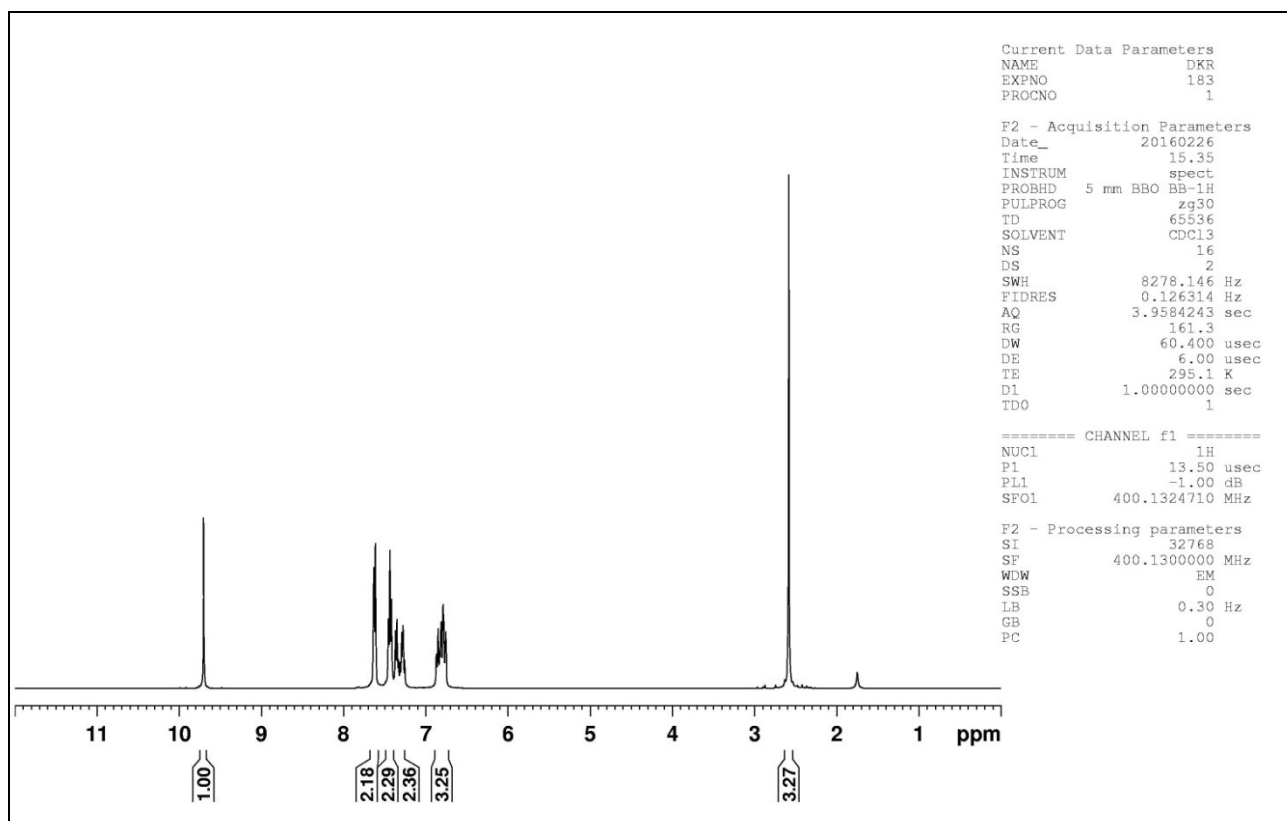

<sup>13</sup>C APT (Attached Proton Test) spectra of compound **4b**

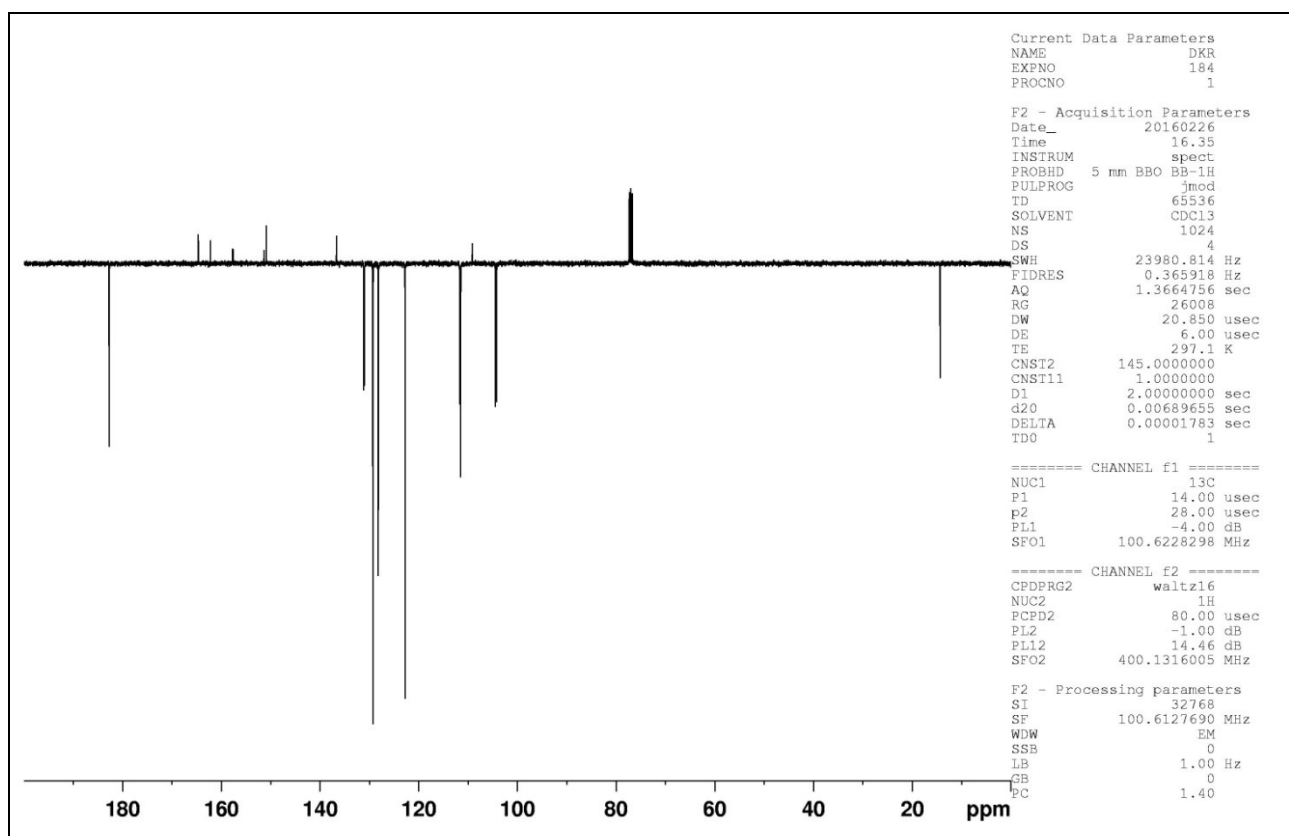

<sup>1</sup>H NMR spectra of compound 4c

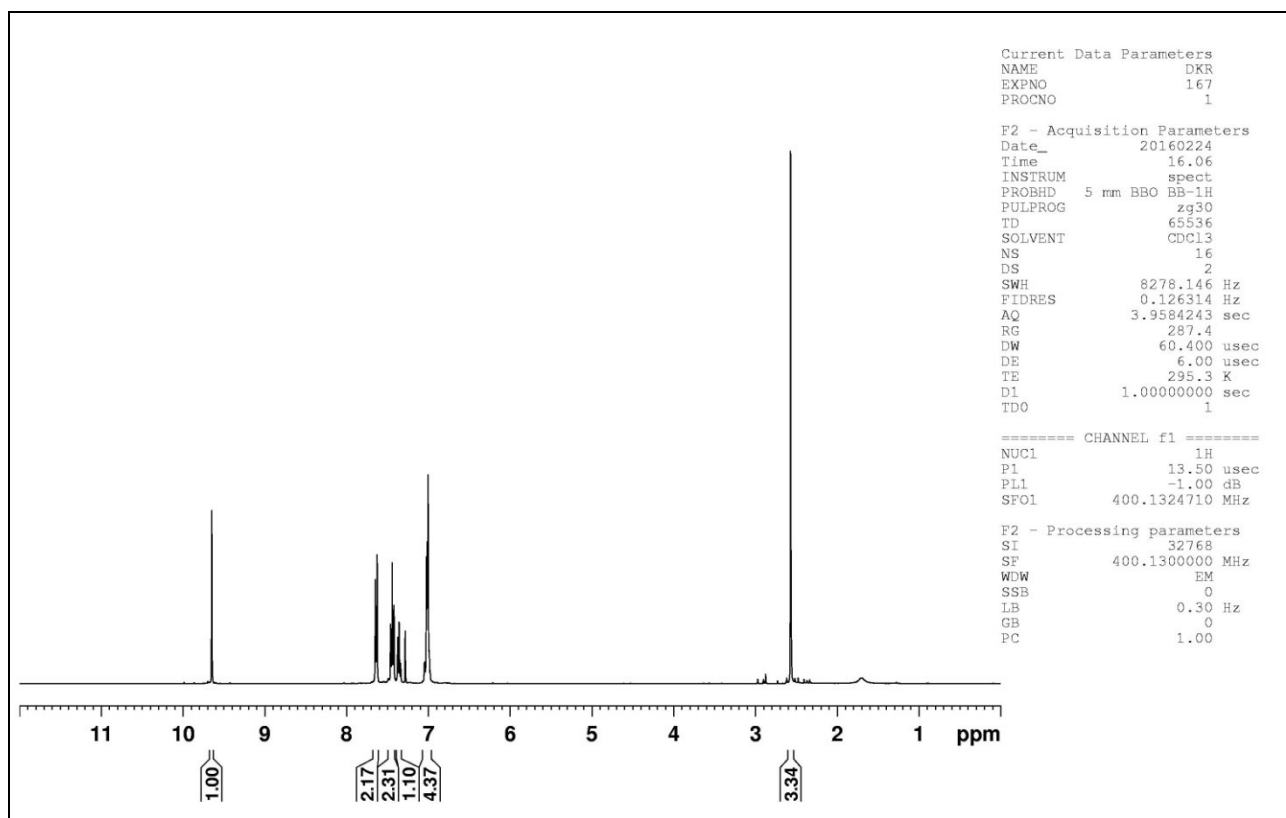

<sup>13</sup>C APT (Attached Proton Test) spectra of compound **4c**

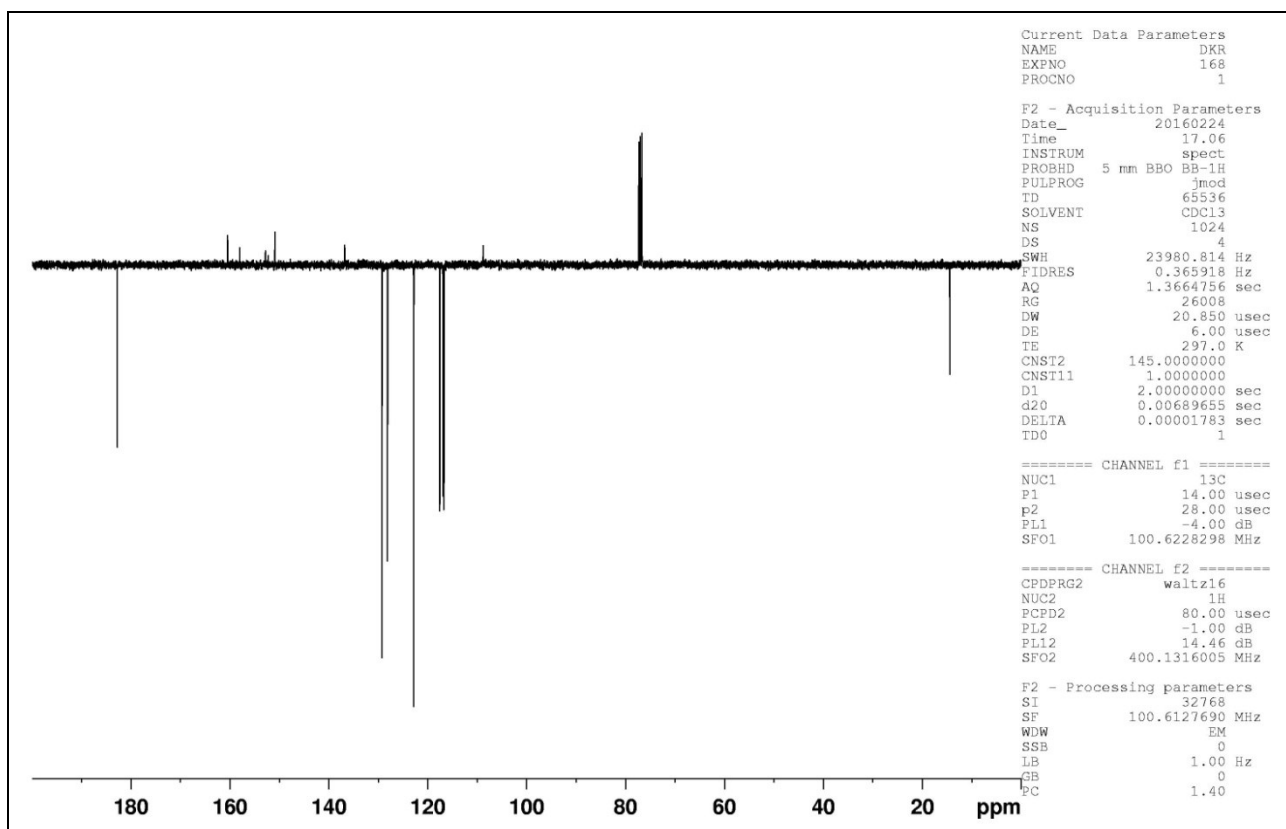

<sup>1</sup>H NMR spectra of compound **4d**

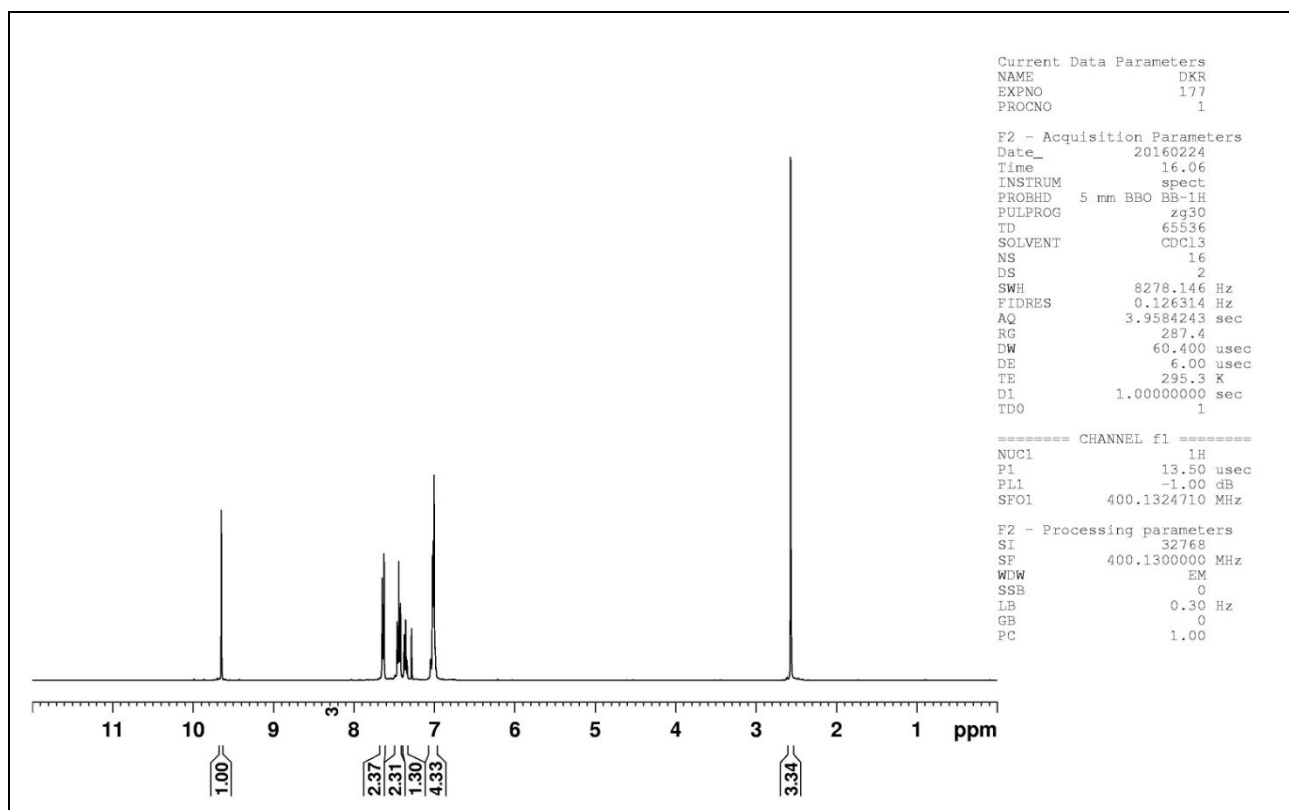



<sup>13</sup>C APT (Attached Proton Test) spectra of compound **4d**

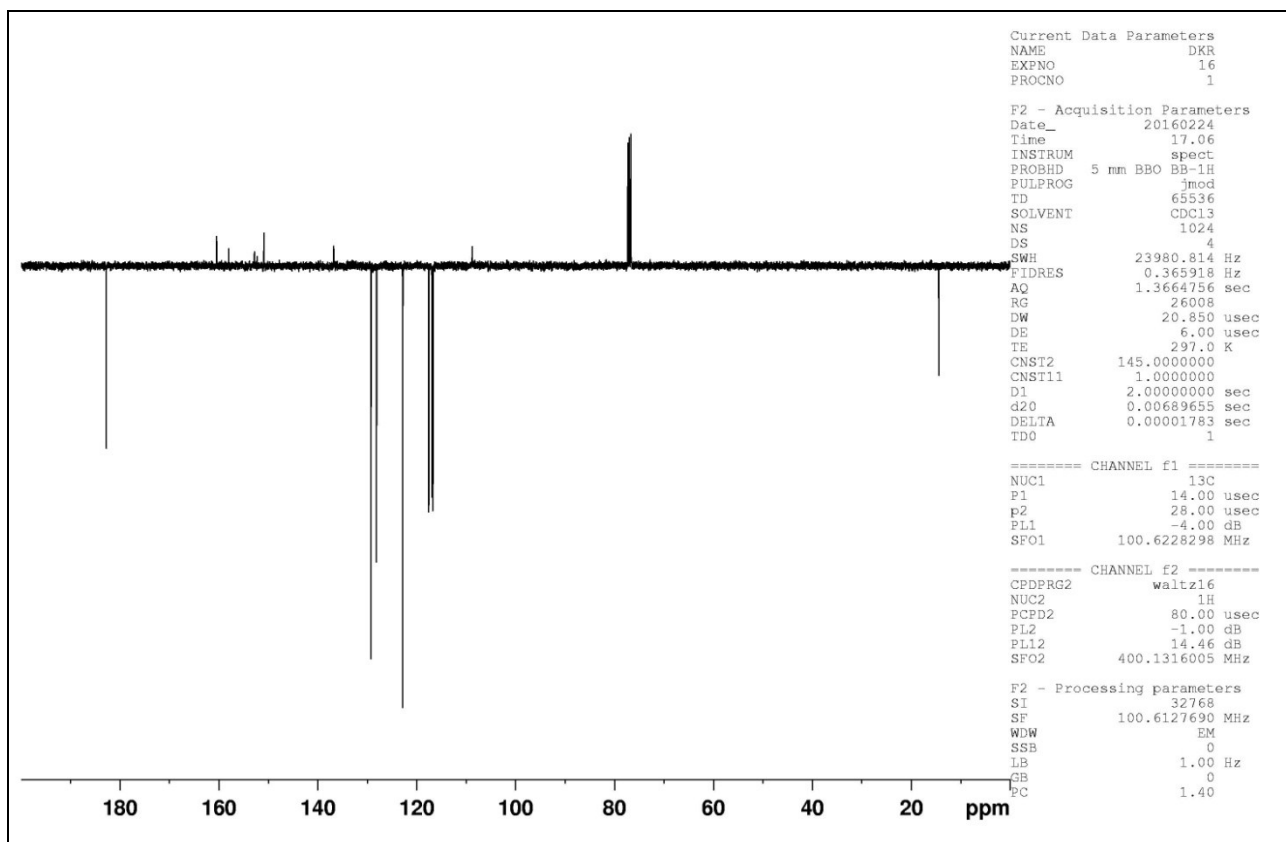

<sup>1</sup>H NMR spectra of compound **6a**

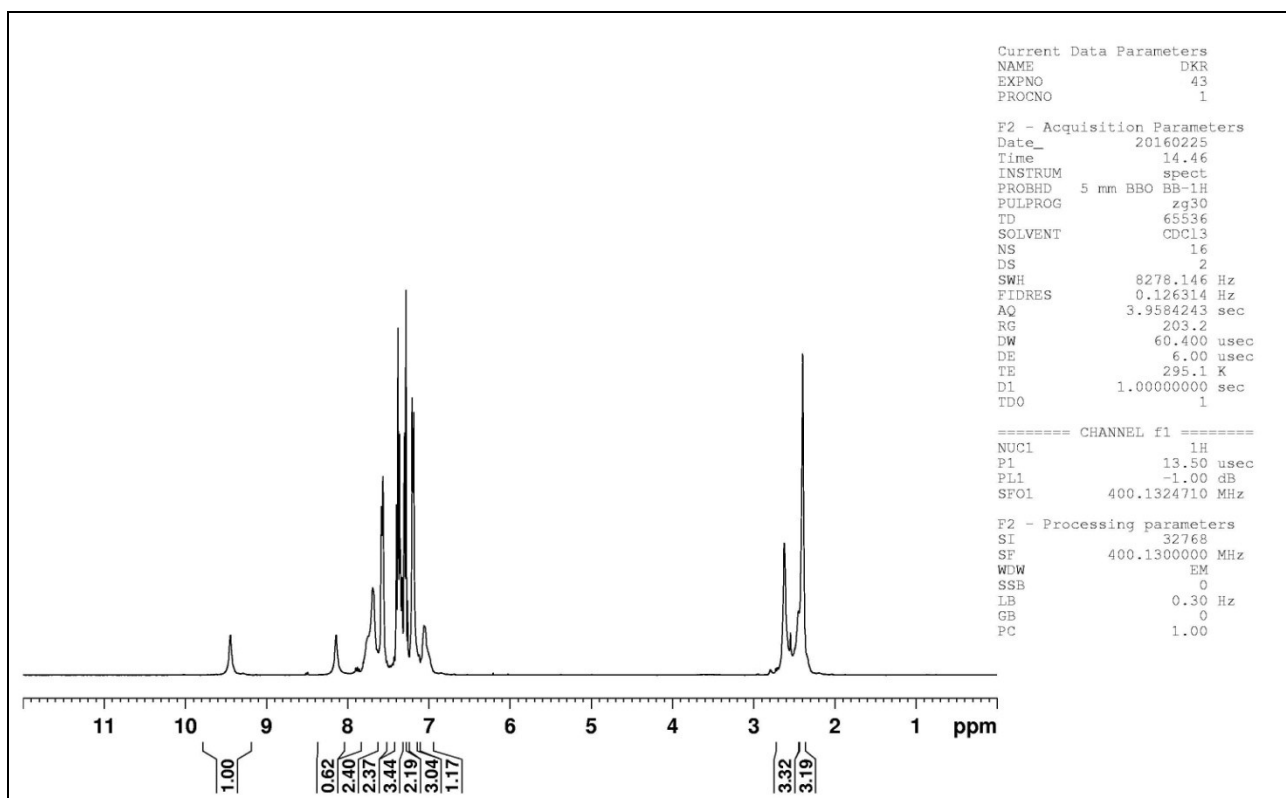

<sup>13</sup>C APT (Attached Proton Test) spectra of compound **6a**

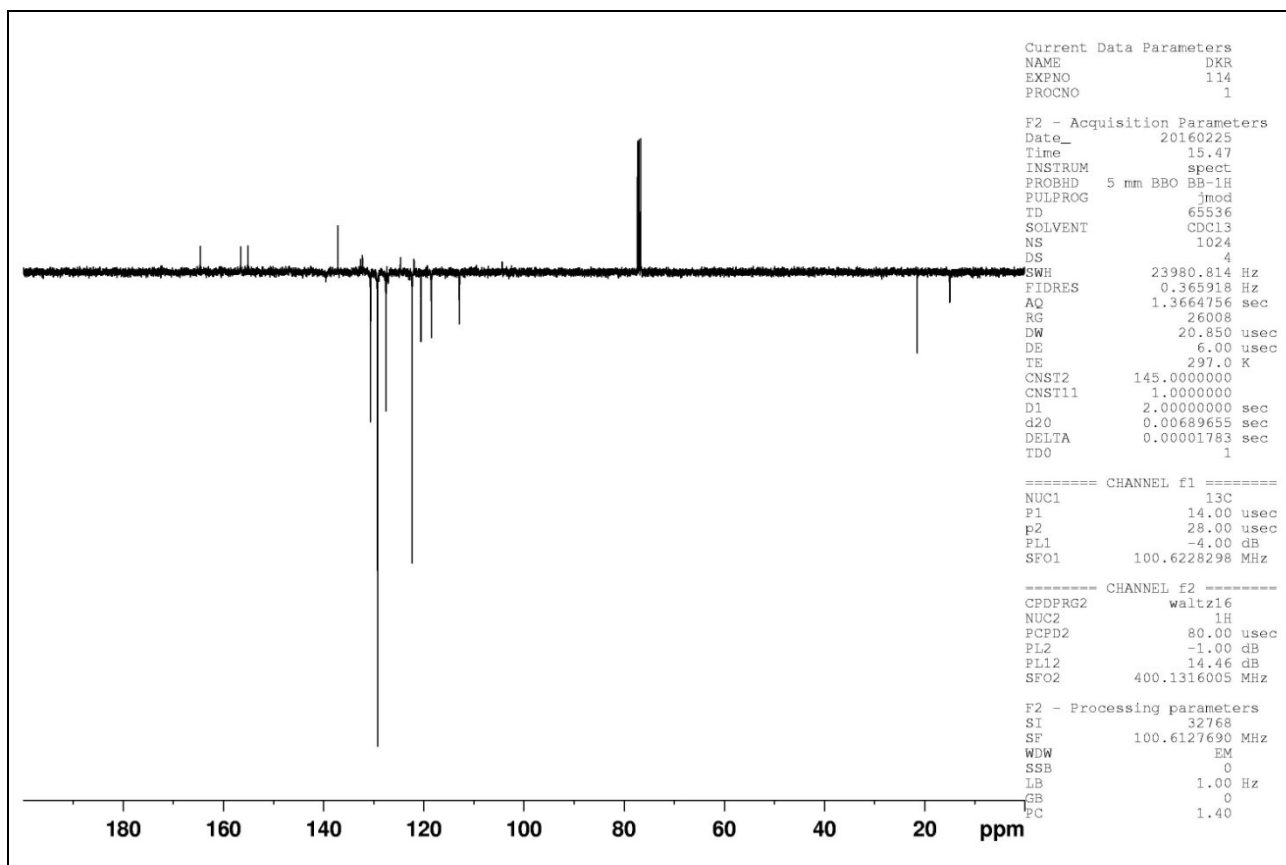

<sup>1</sup>H NMR spectra of compound **6b**

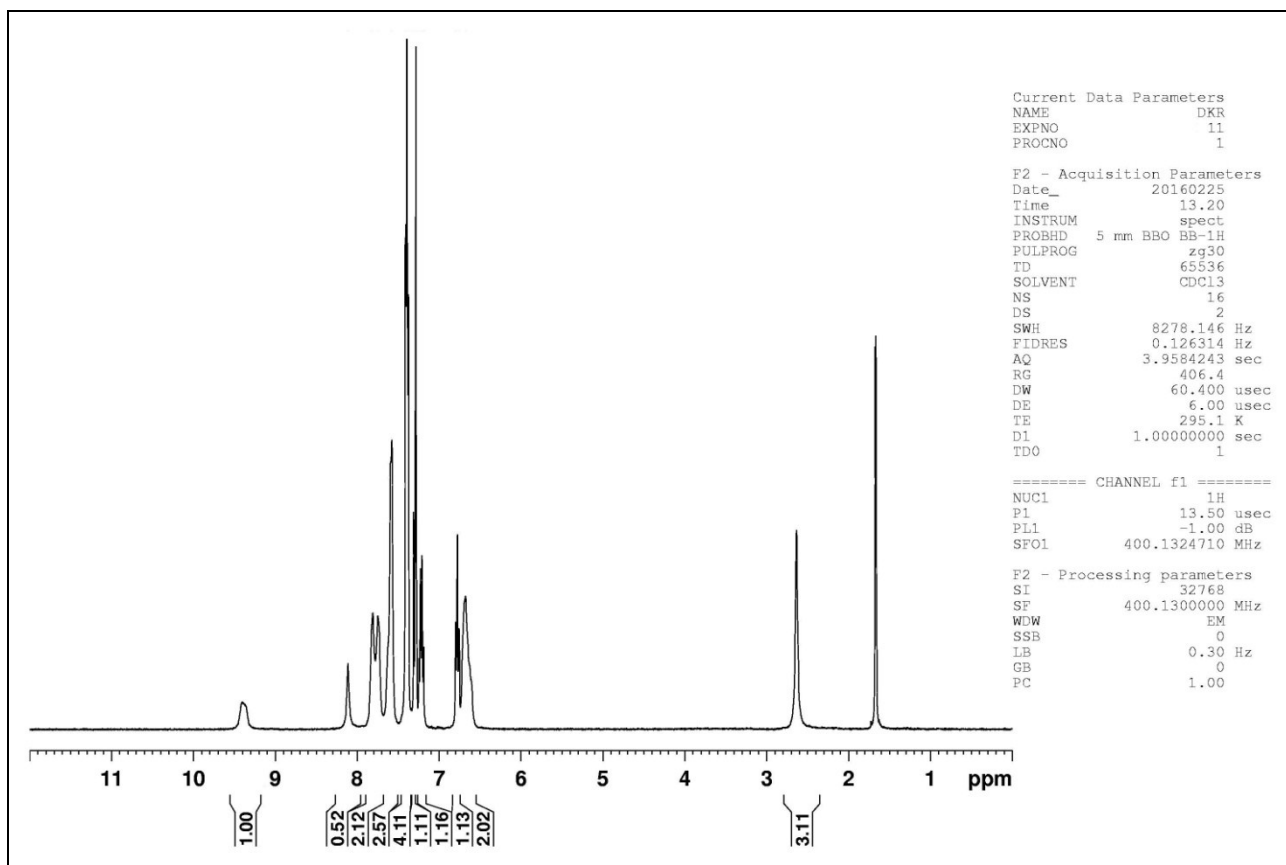

<sup>13</sup>C APT (Attached Proton Test) spectra of compound **6b**

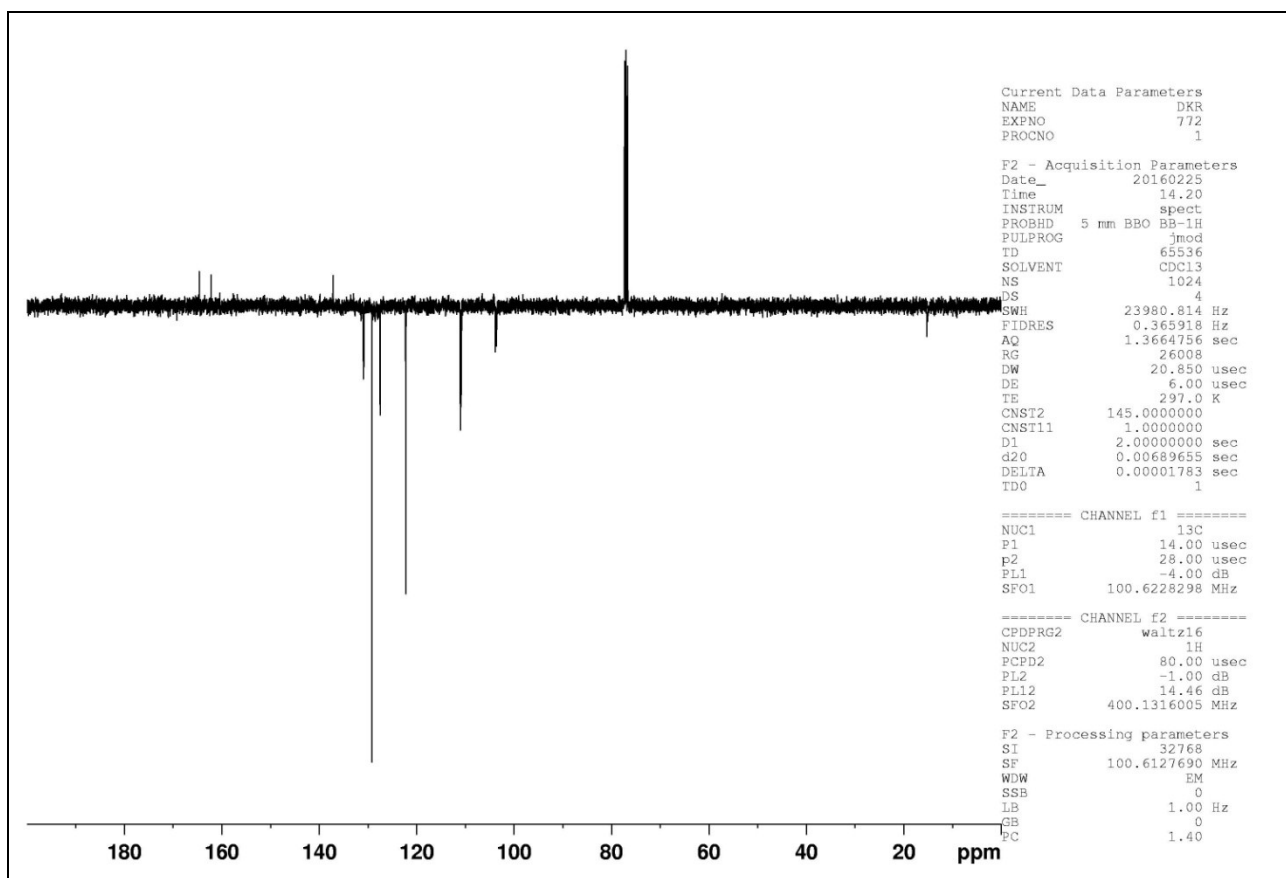

<sup>1</sup>H NMR spectra of compound **6c**

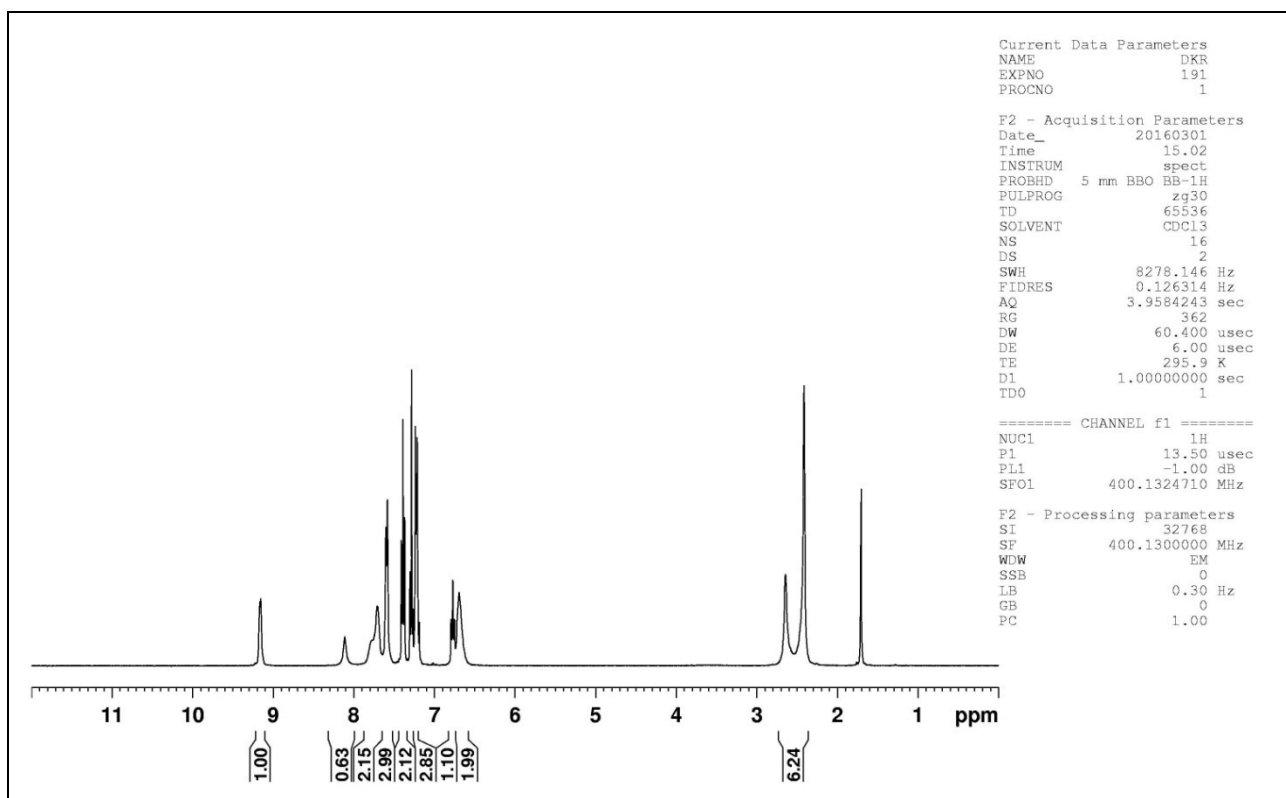

<sup>13</sup>C APT (Attached Proton Test) spectra of compound **6c**

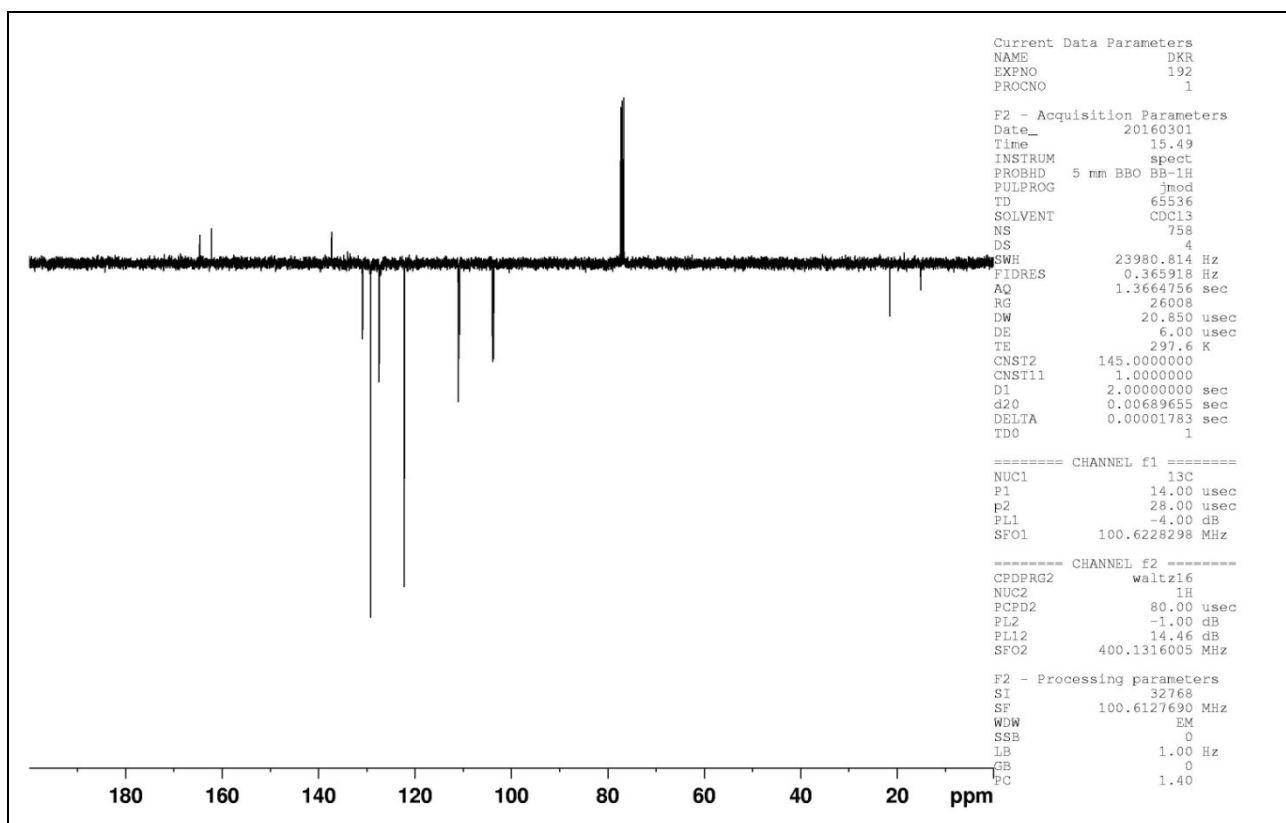

<sup>1</sup>H NMR spectra of compound **6d**

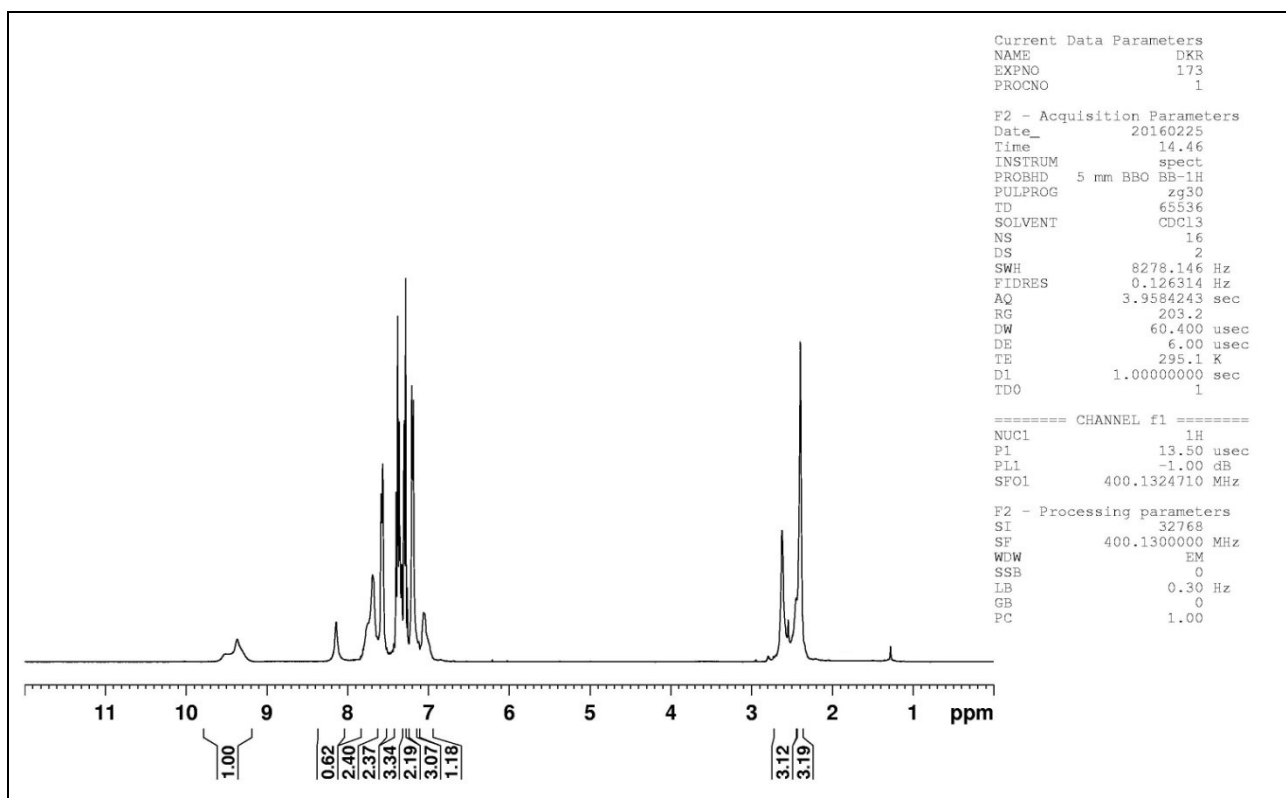



<sup>13</sup>C APT (Attached Proton Test) spectra of compound **6d**

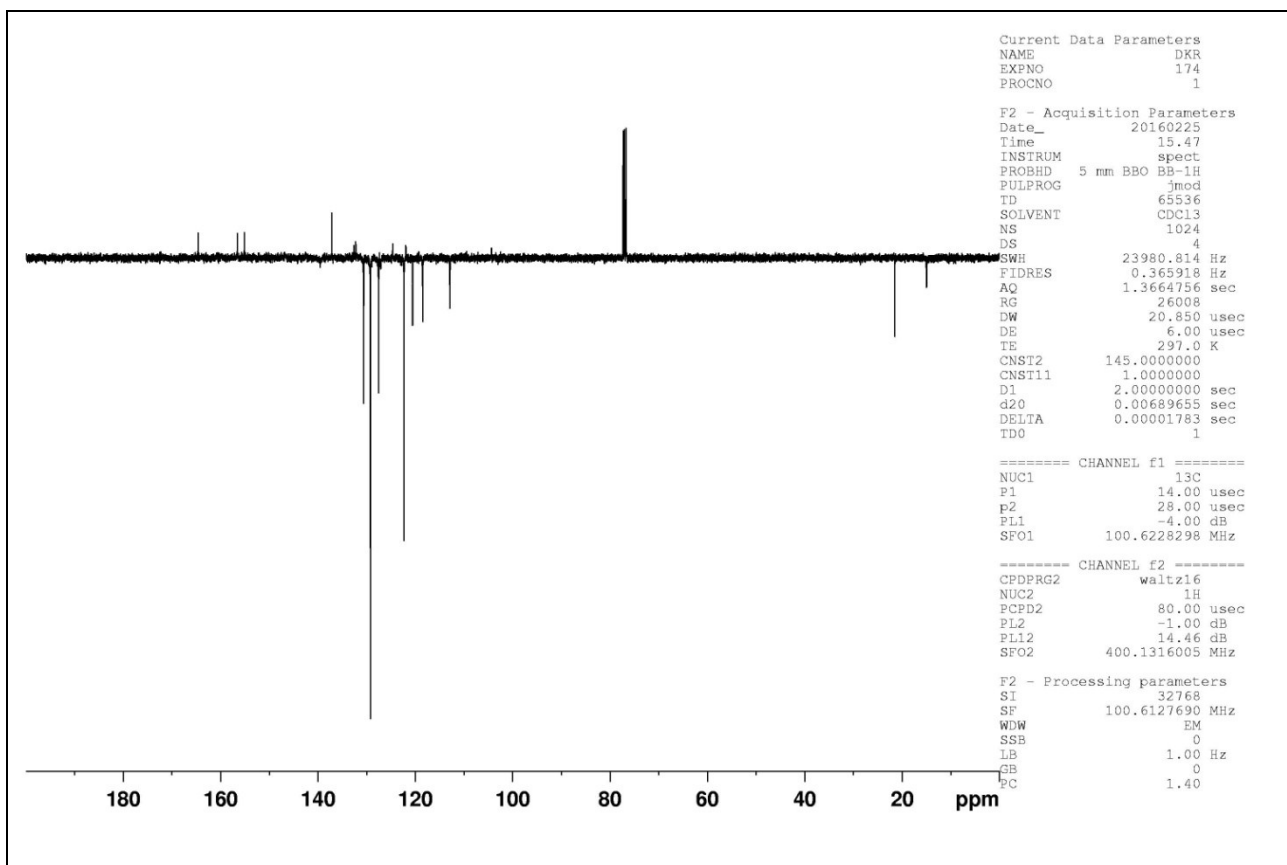

<sup>1</sup>H NMR spectra of compound **6e**

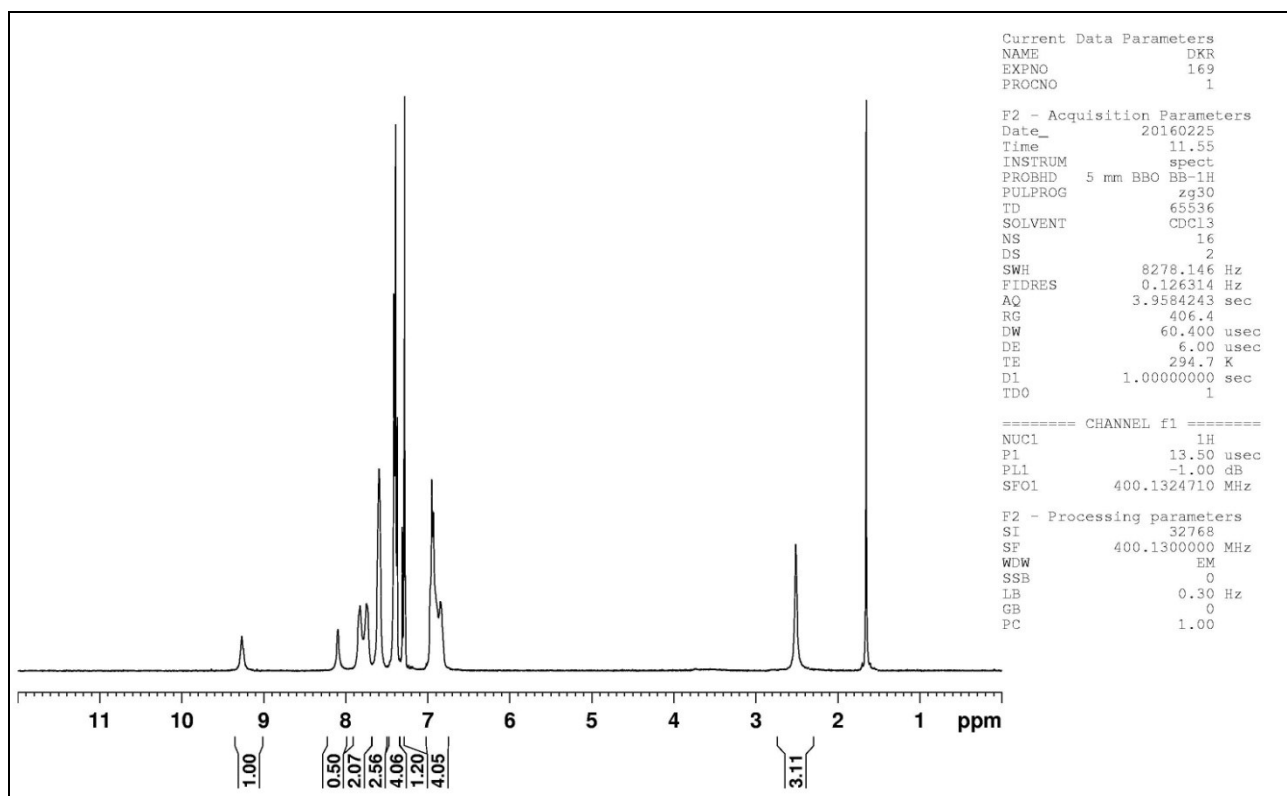

<sup>13</sup>C APT (Attached Proton Test) spectra of compound **6e**

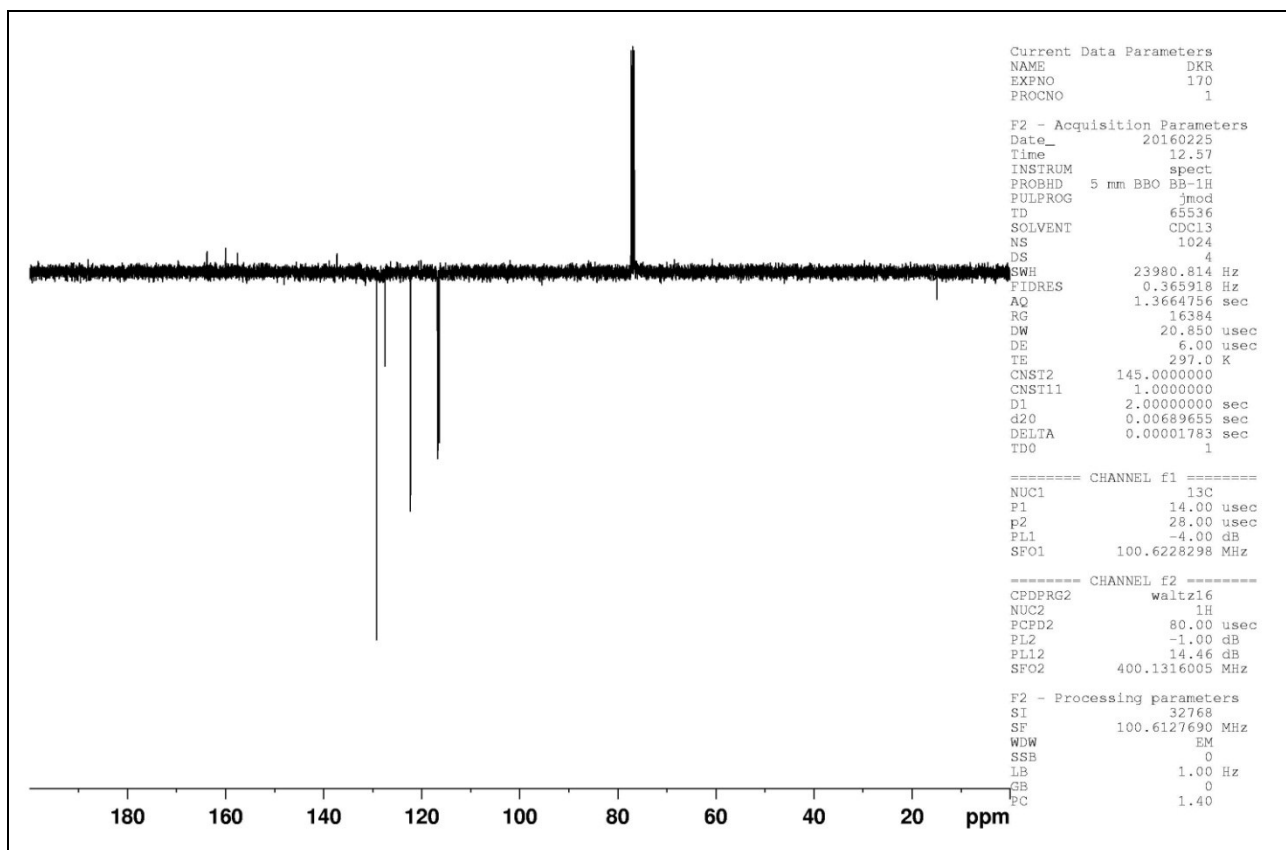

<sup>1</sup>H NMR spectra of compound **6f**

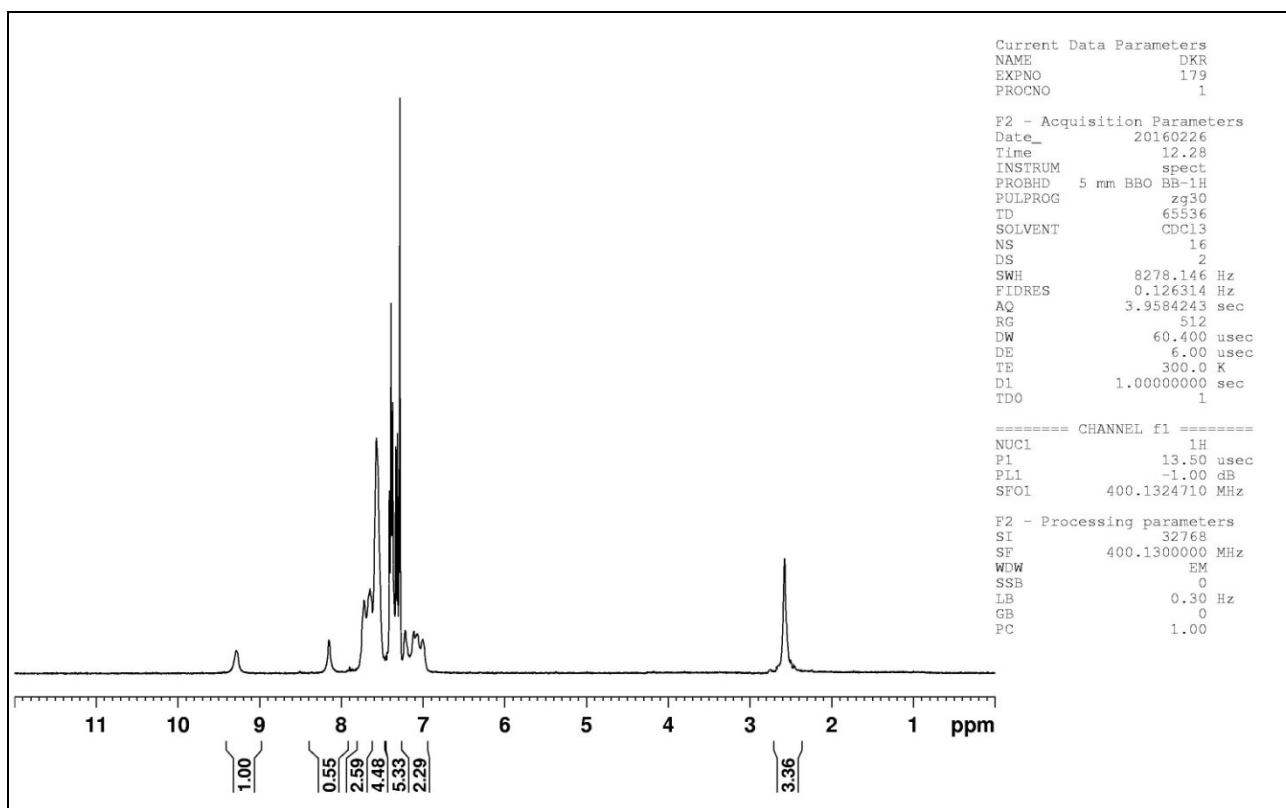

<sup>13</sup>C APT (Attached Proton Test) spectra of compound **6f**

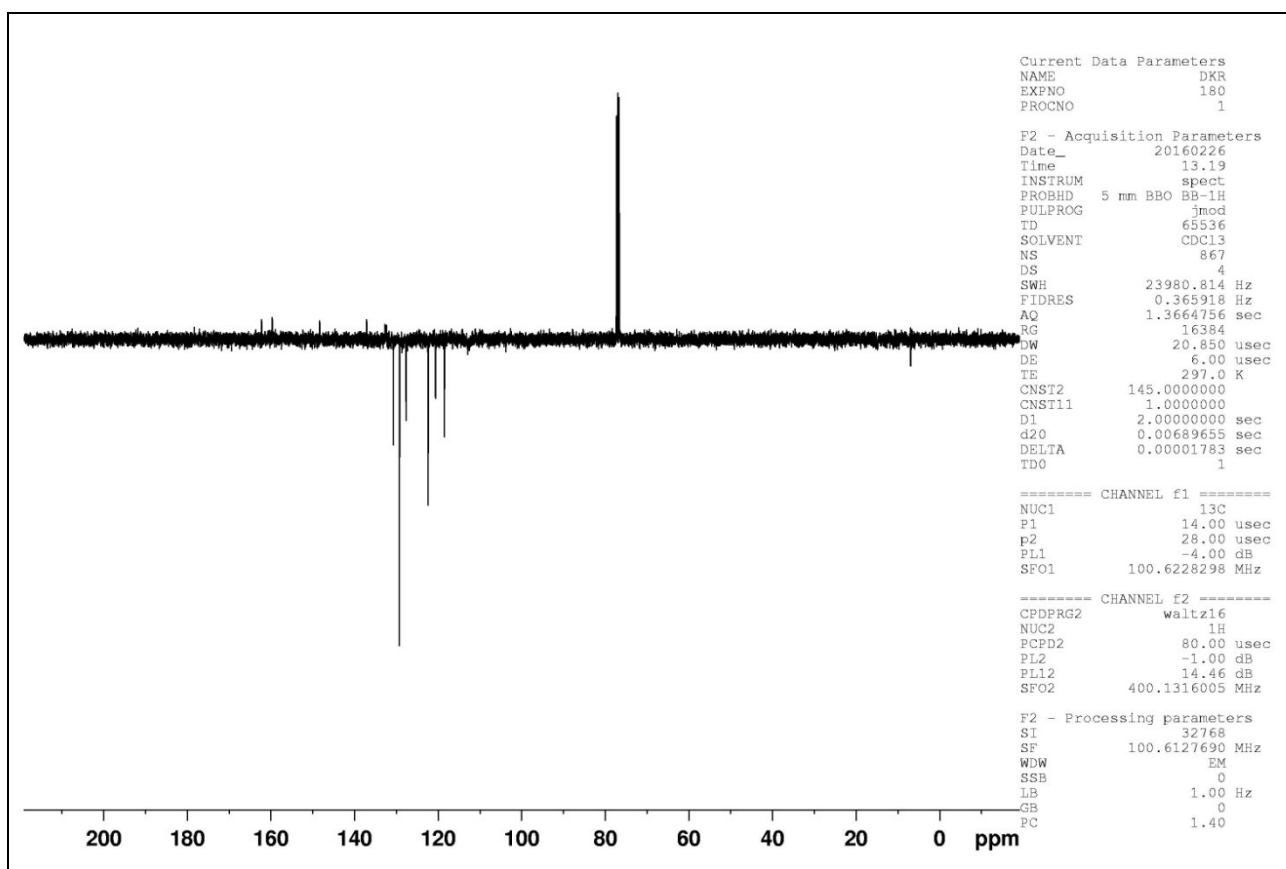

<sup>1</sup>H NMR spectra of compound **6g**

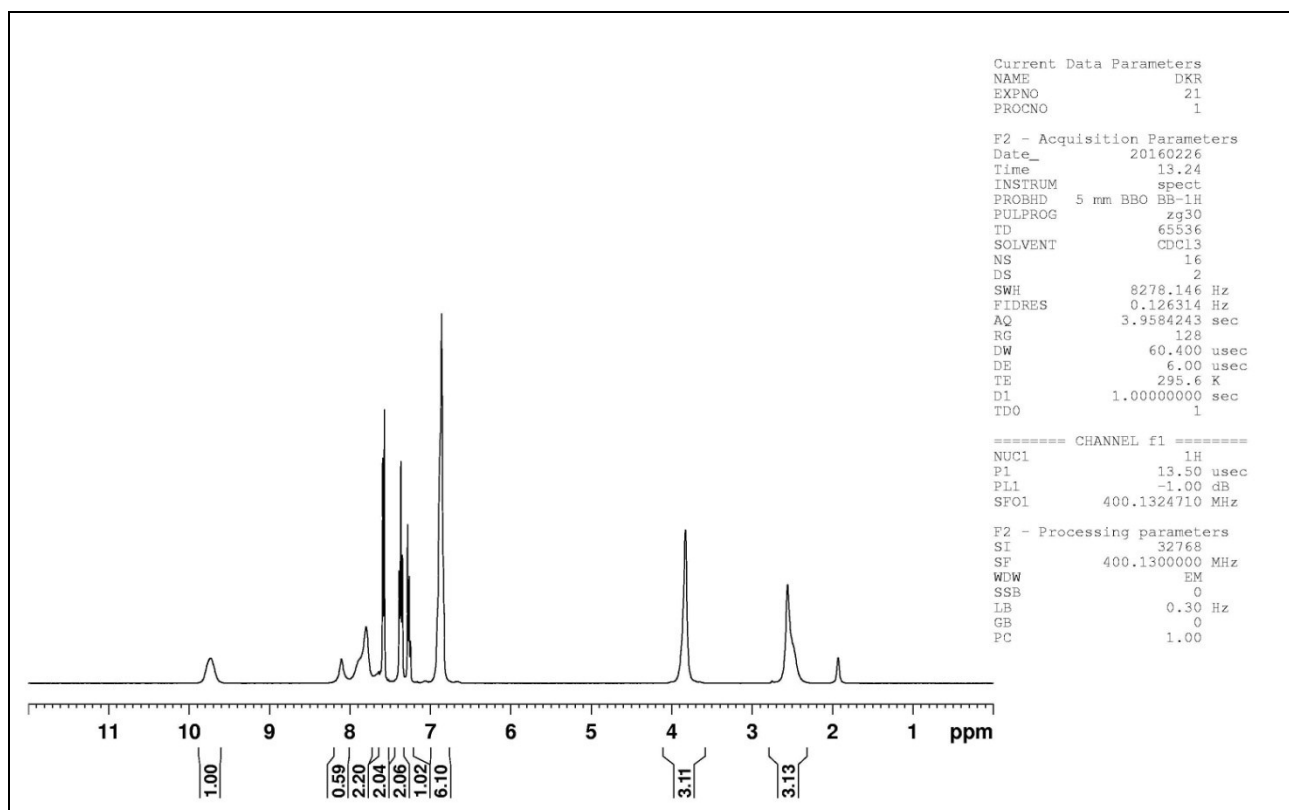

<sup>13</sup>C APT (Attached Proton Test) spectra of compound **6g**

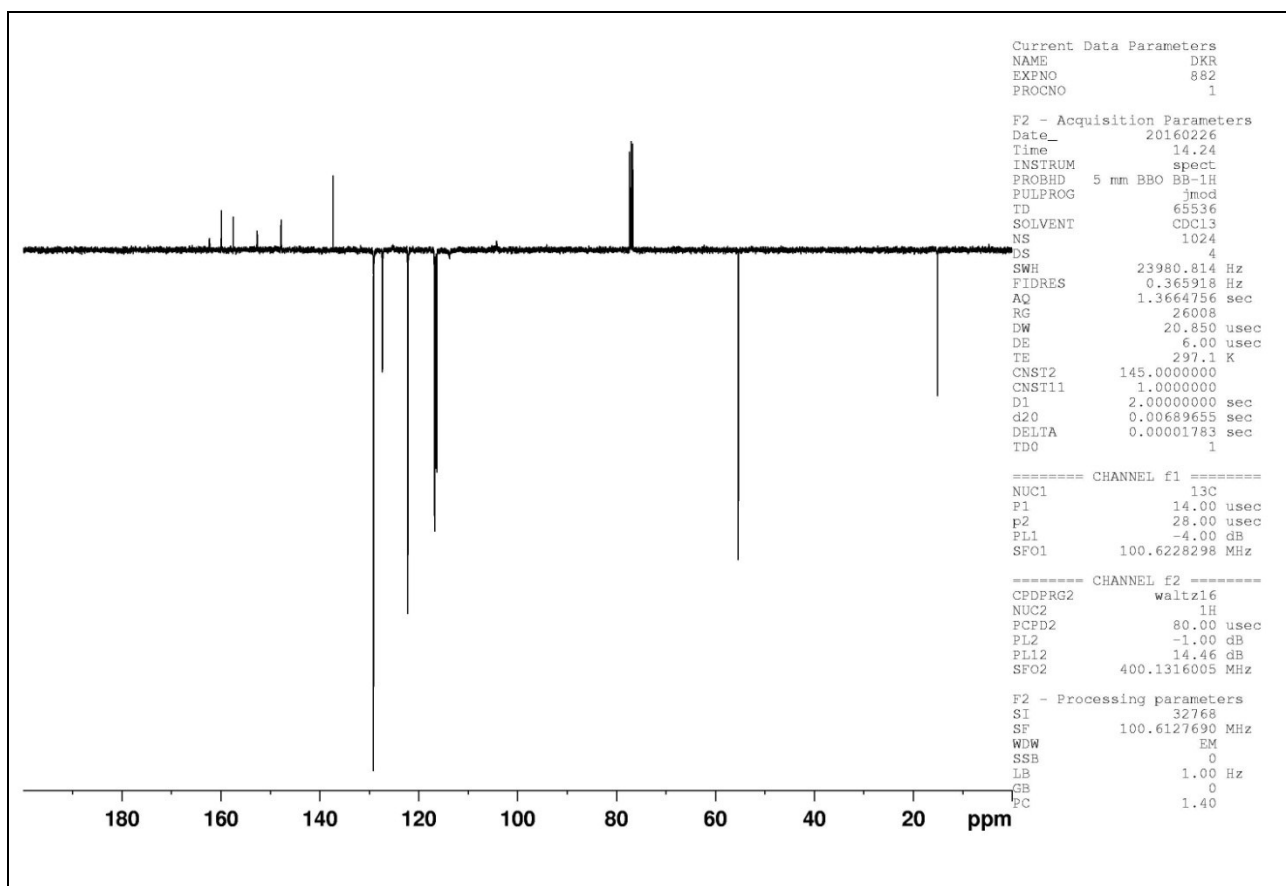

<sup>1</sup>H NMR spectra of compound **6h**

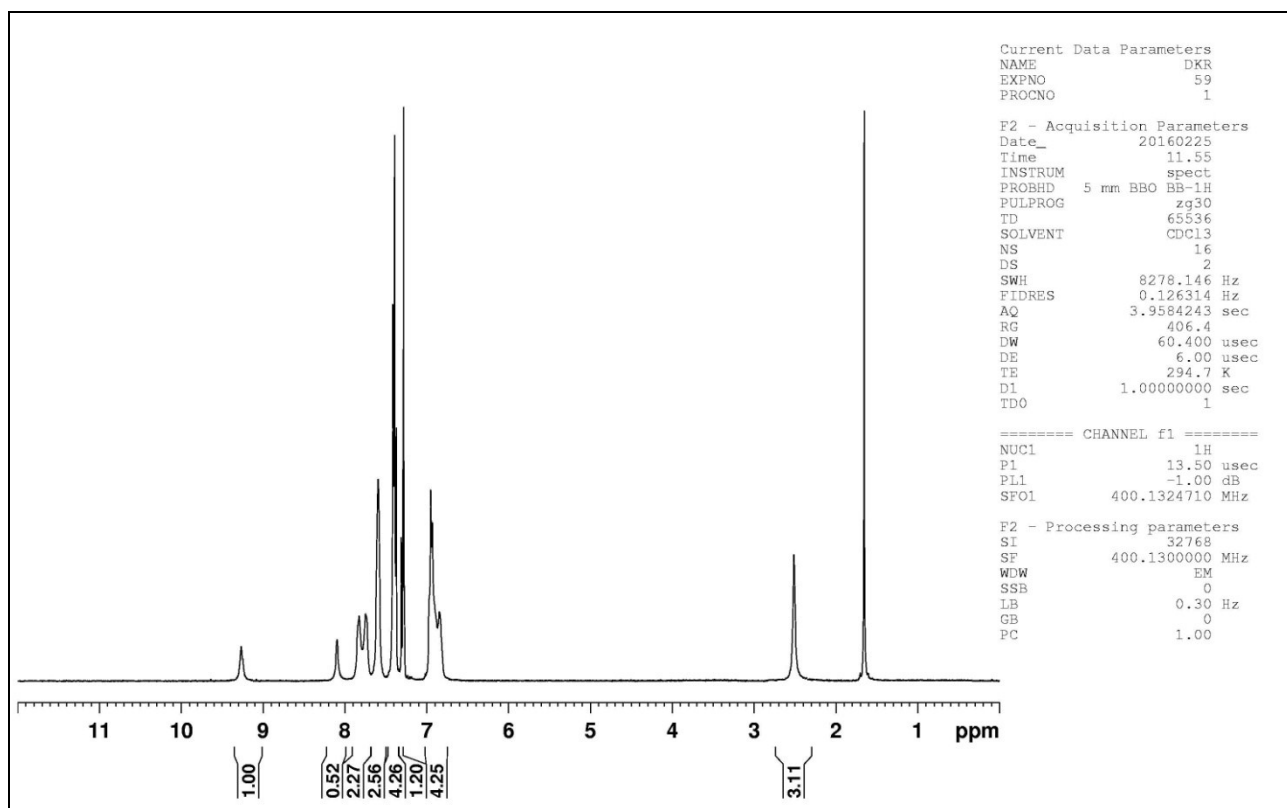



<sup>13</sup>C APT (Attached Proton Test) spectra of compound **6h**

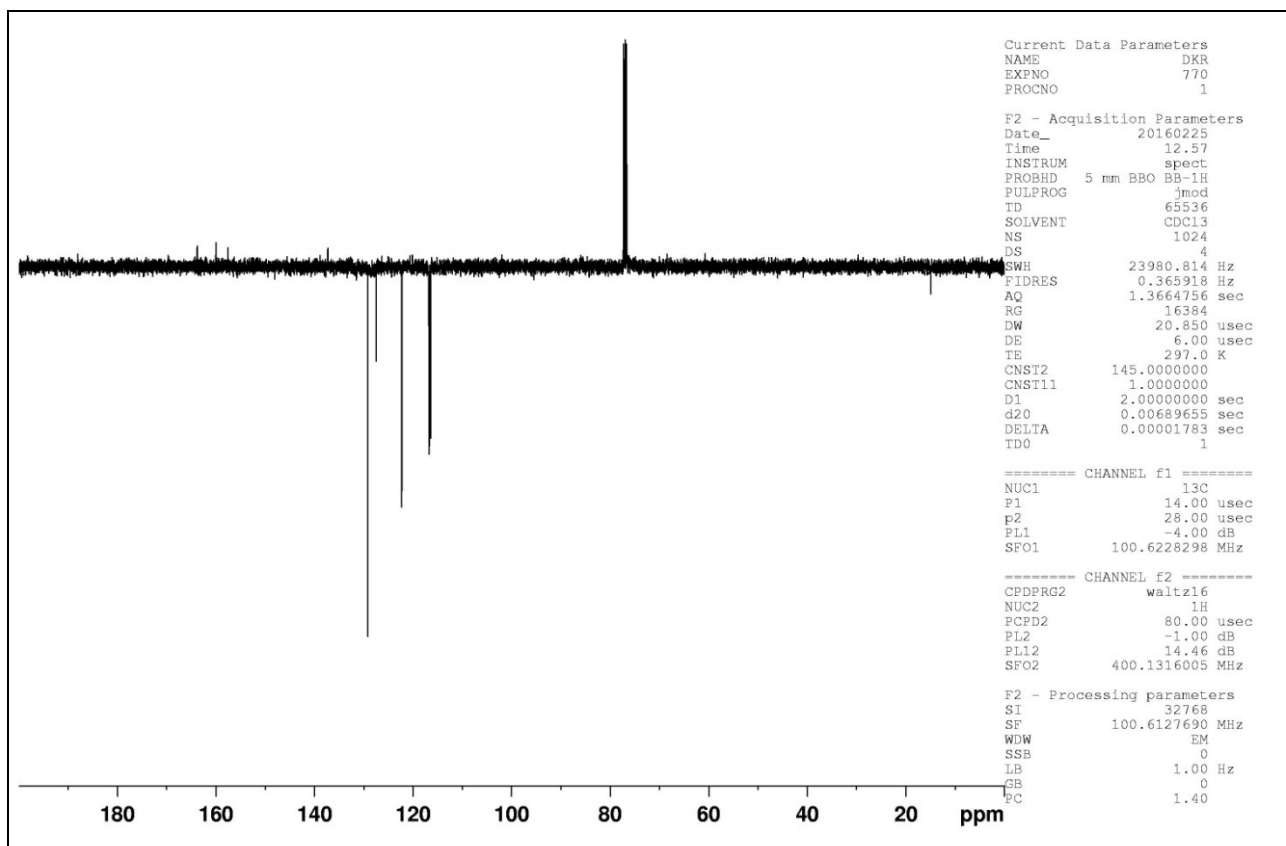

<sup>1</sup>H NMR spectra of compound **6i**

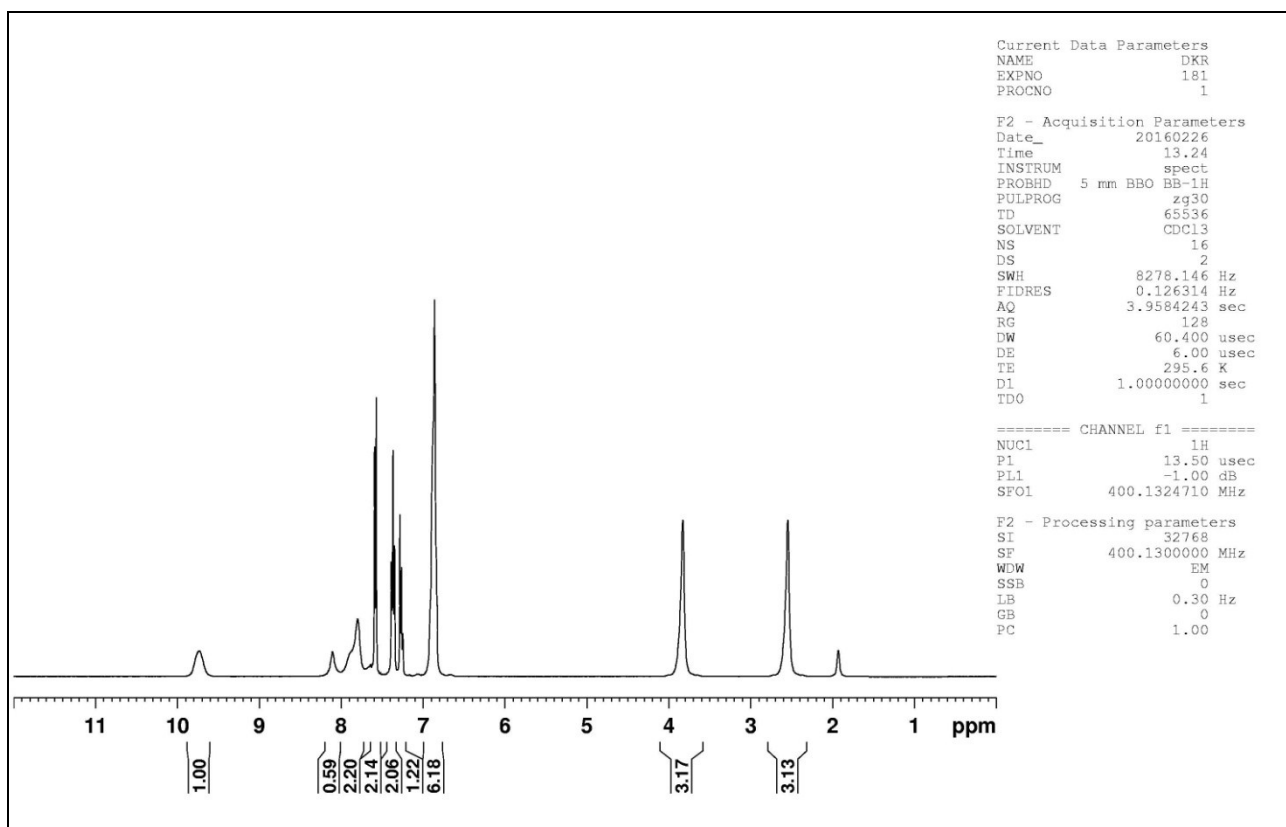

<sup>13</sup>C APT (Attached Proton Test) spectra of compound **6i**

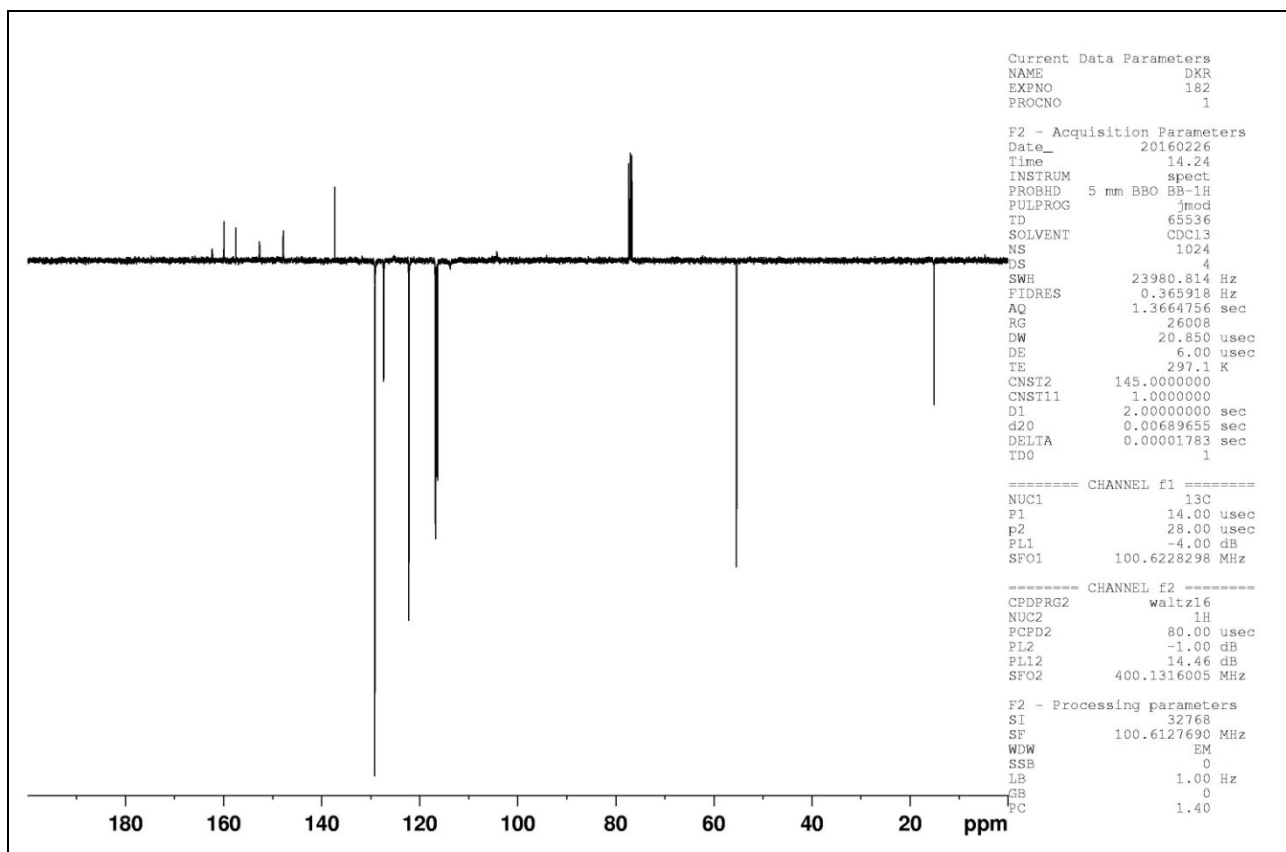

<sup>1</sup>H NMR spectra of compound **6j**

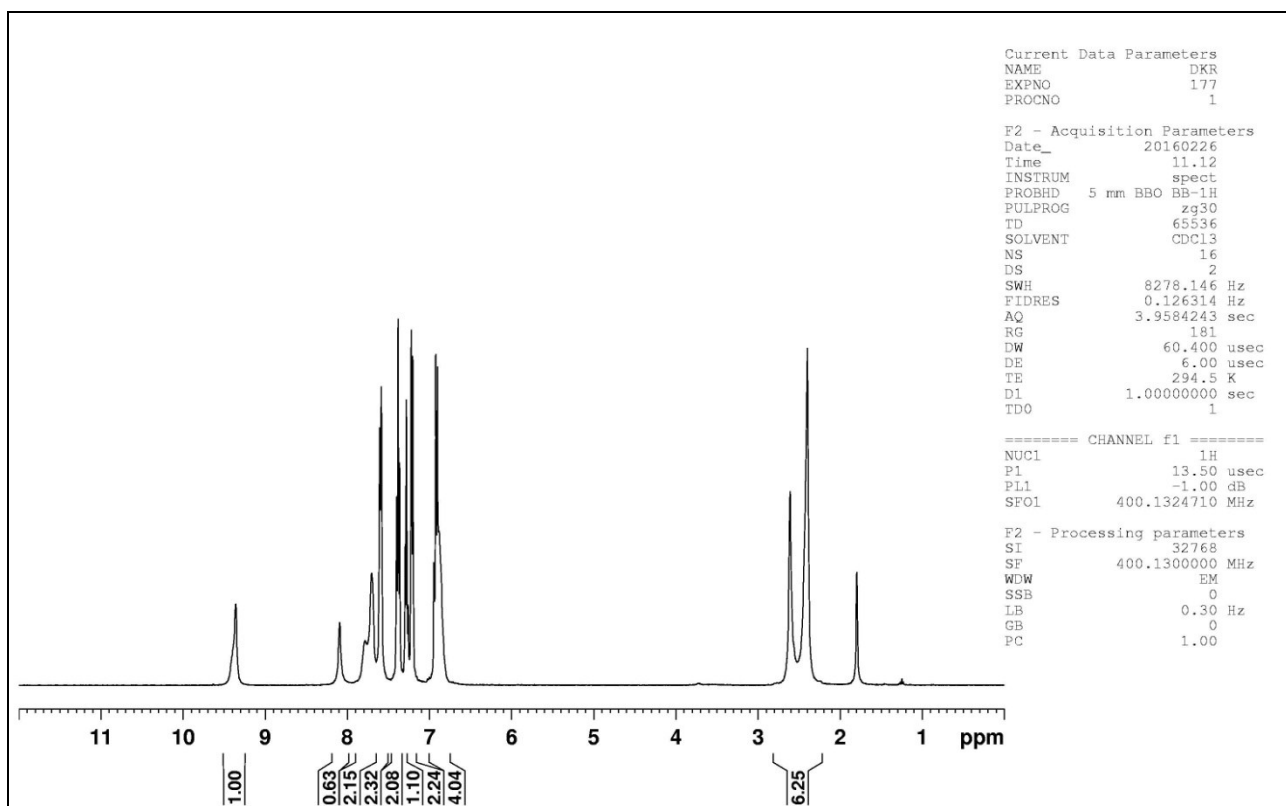

<sup>13</sup>C APT (Attached Proton Test) spectra of compound **6j**

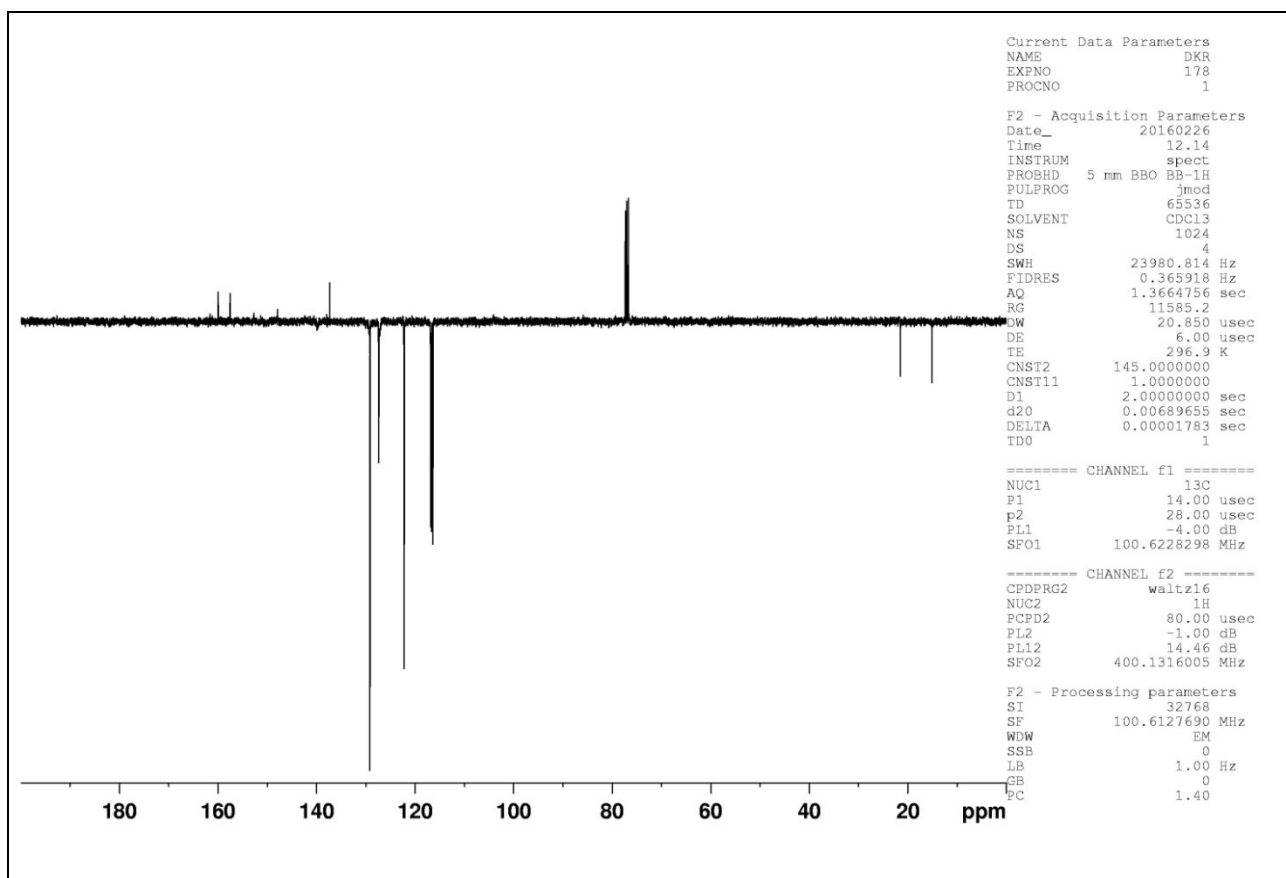

<sup>1</sup>H NMR spectra of compound **6k**

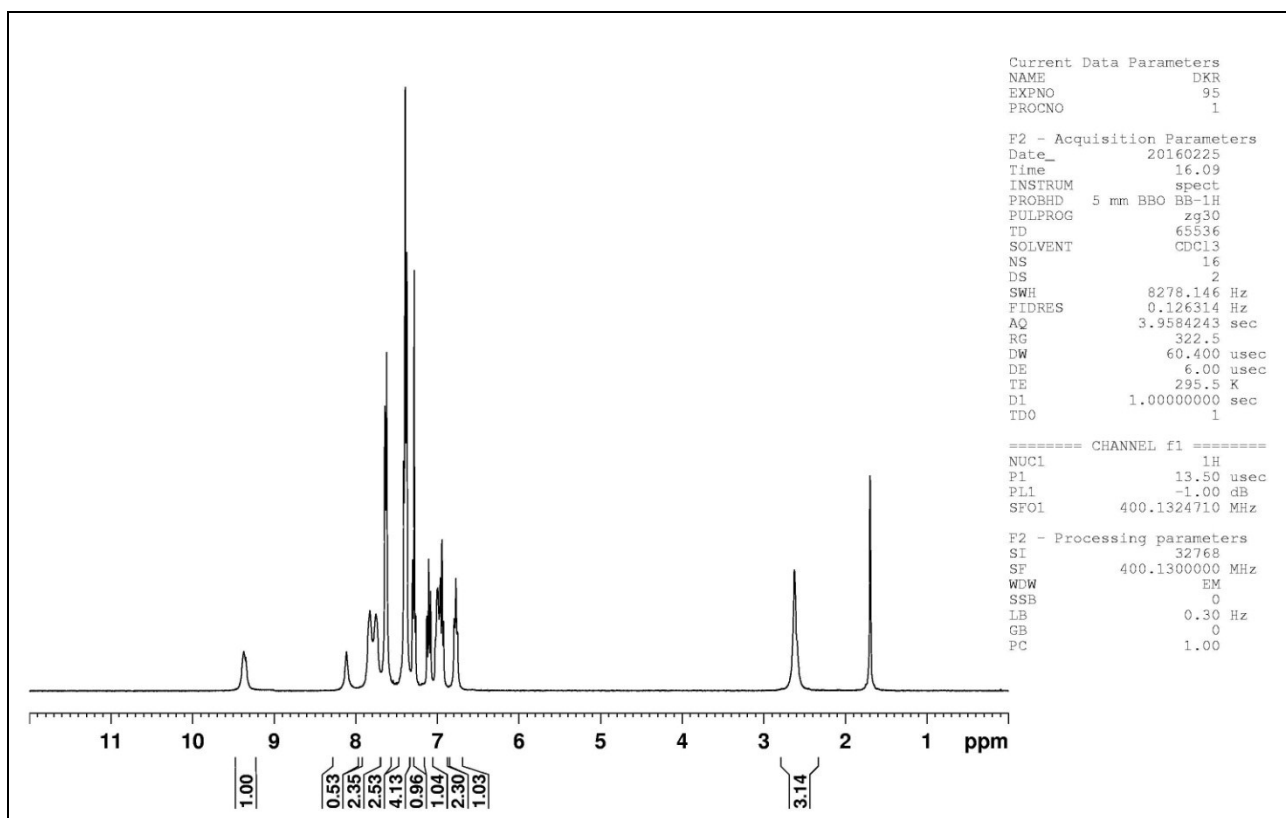

<sup>13</sup>C APT (Attached Proton Test) spectra of compound **6k**

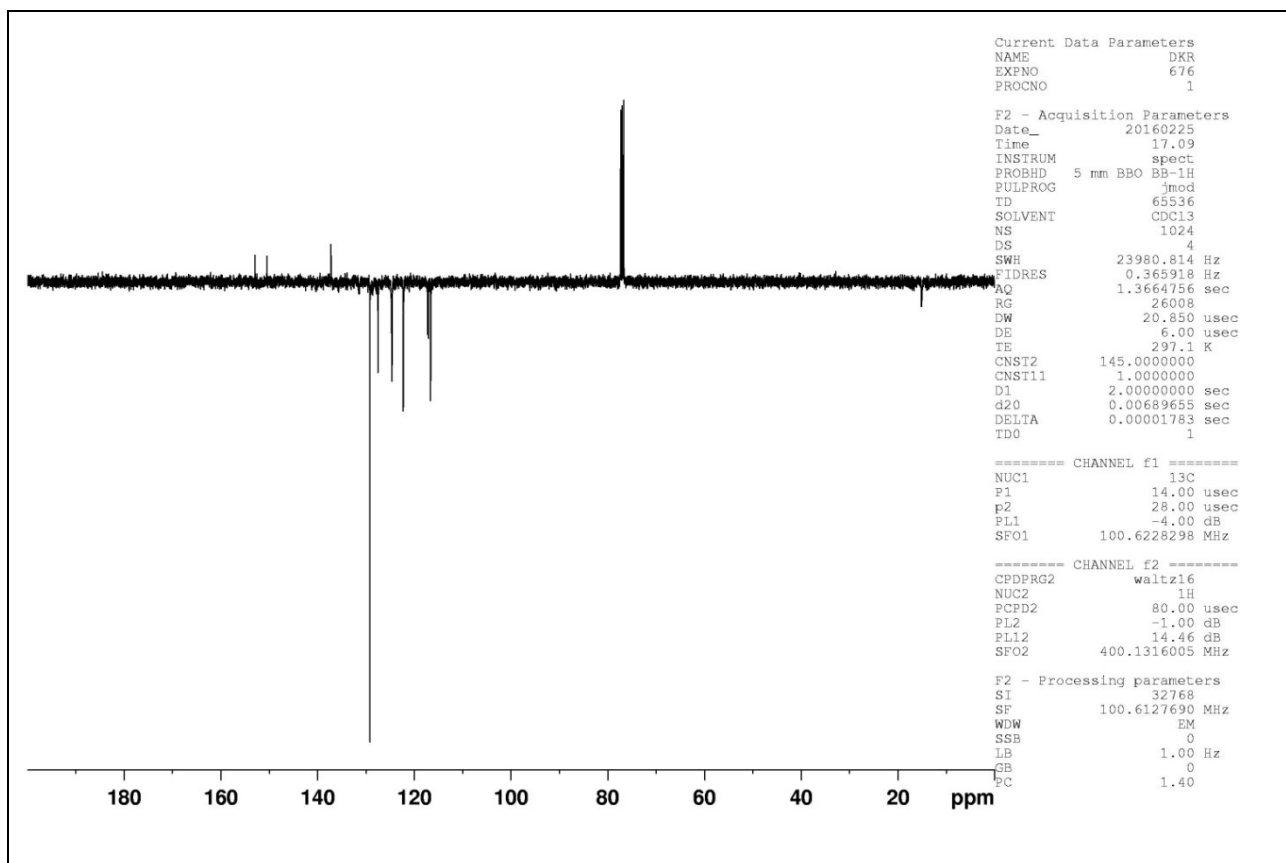

<sup>1</sup>H NMR spectra of compound **6l**

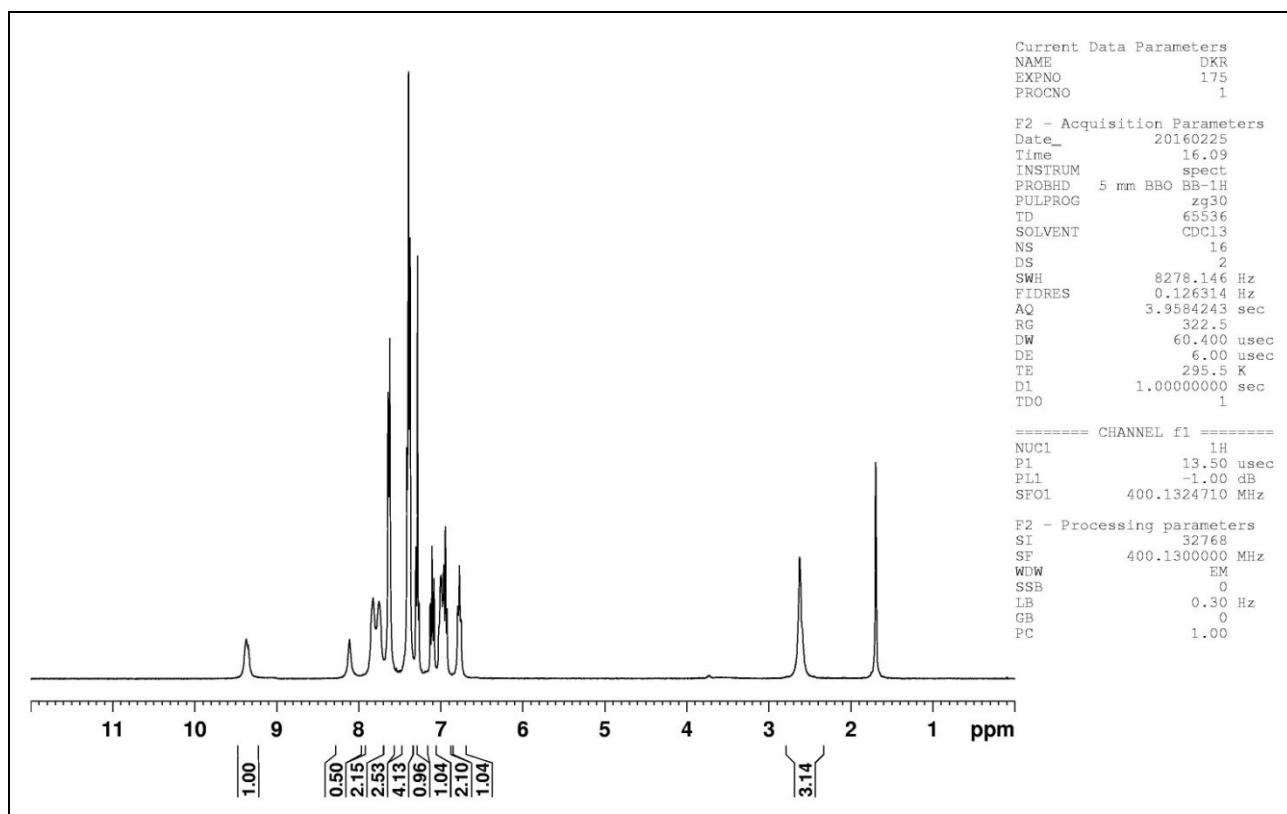



<sup>13</sup>C APT (Attached Proton Test) spectra of compound **6I**

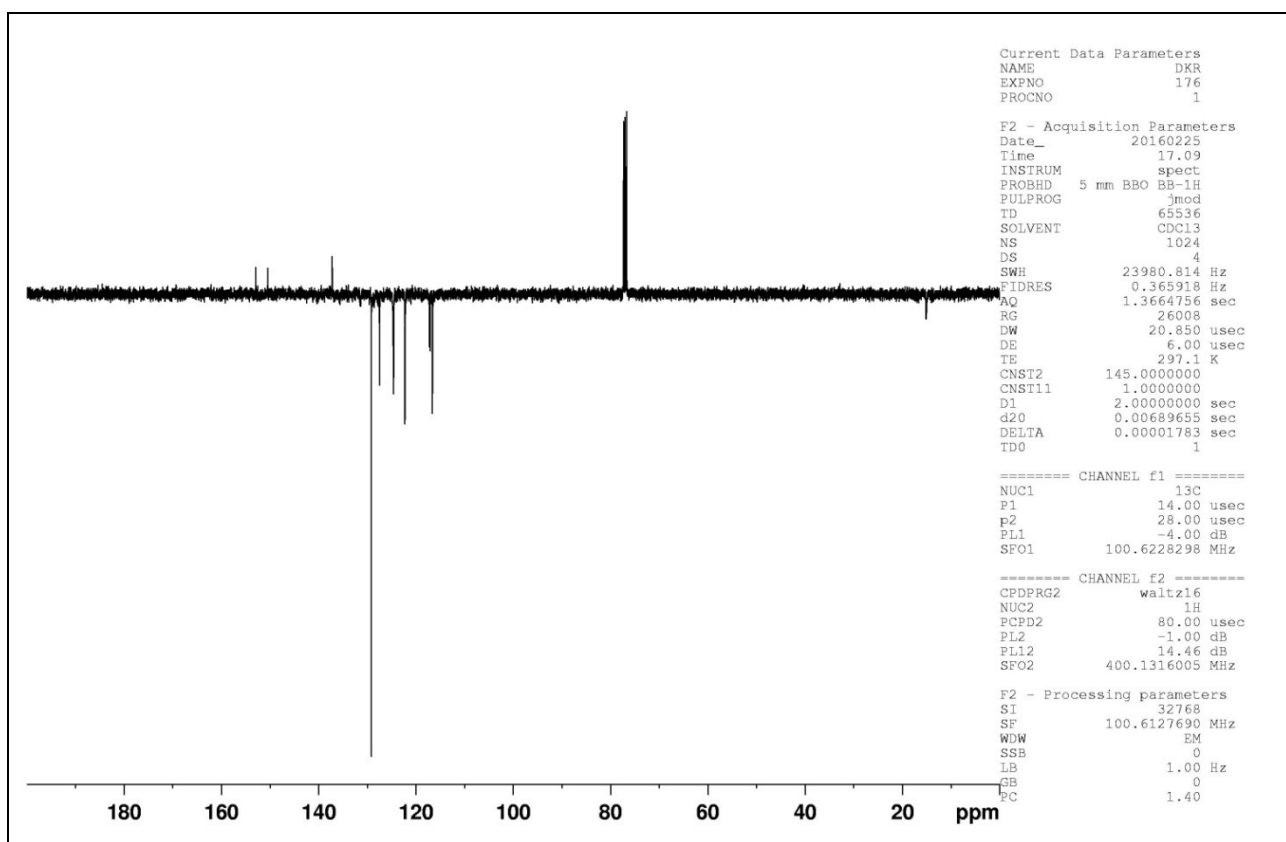

<sup>1</sup>H NMR spectra of compound **6m**

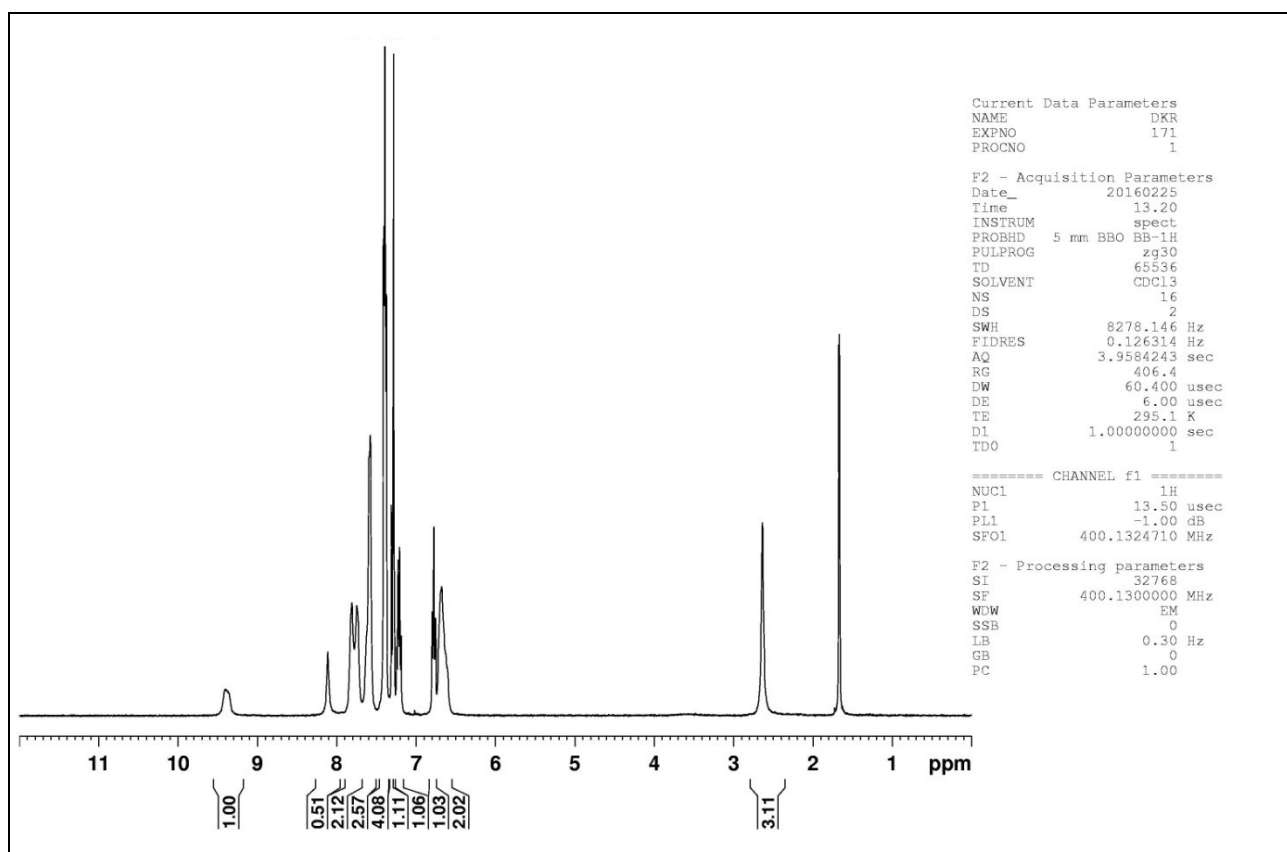

<sup>13</sup>C APT (Attached Proton Test) spectra of compound **6m**

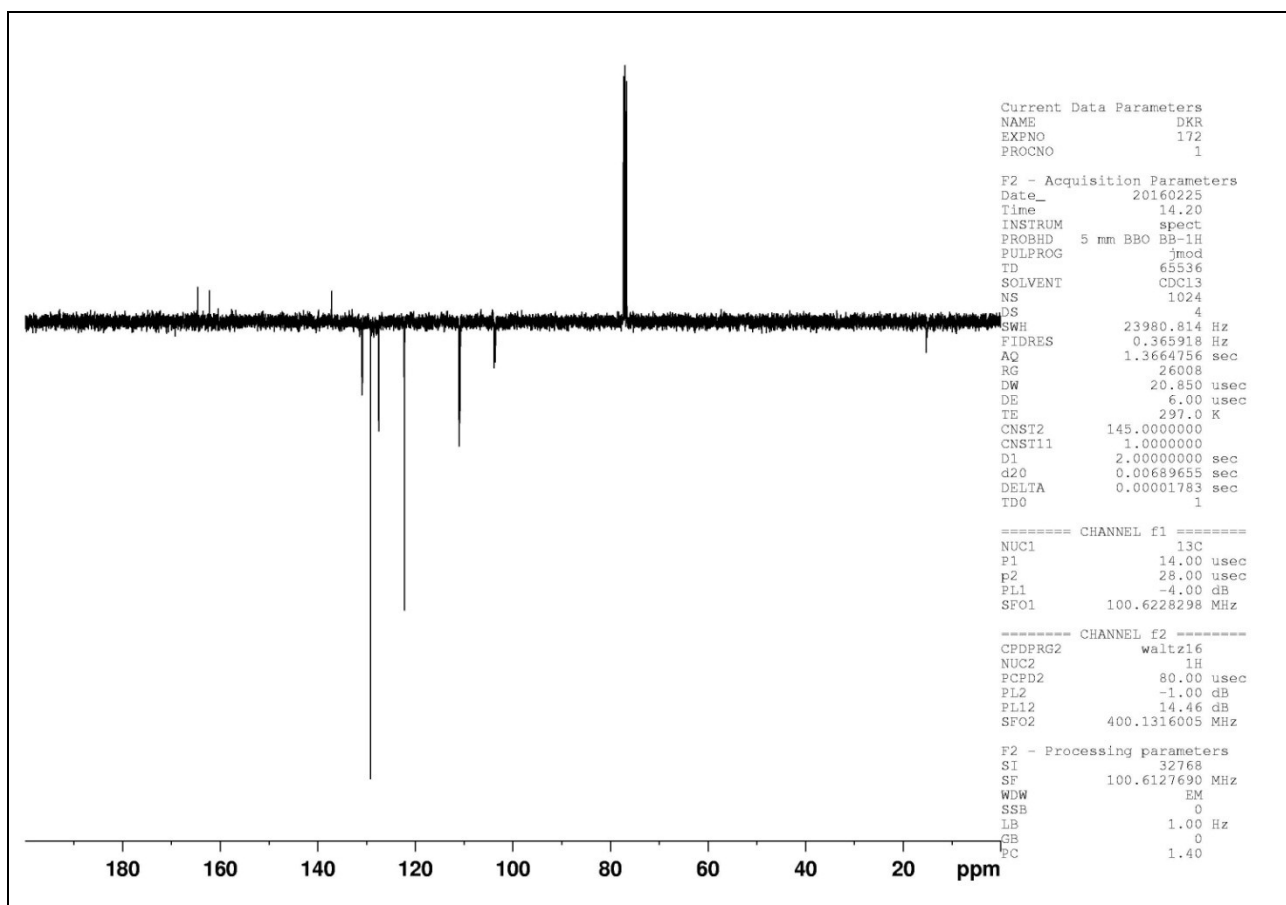

<sup>1</sup>H NMR spectra of compound **6n**

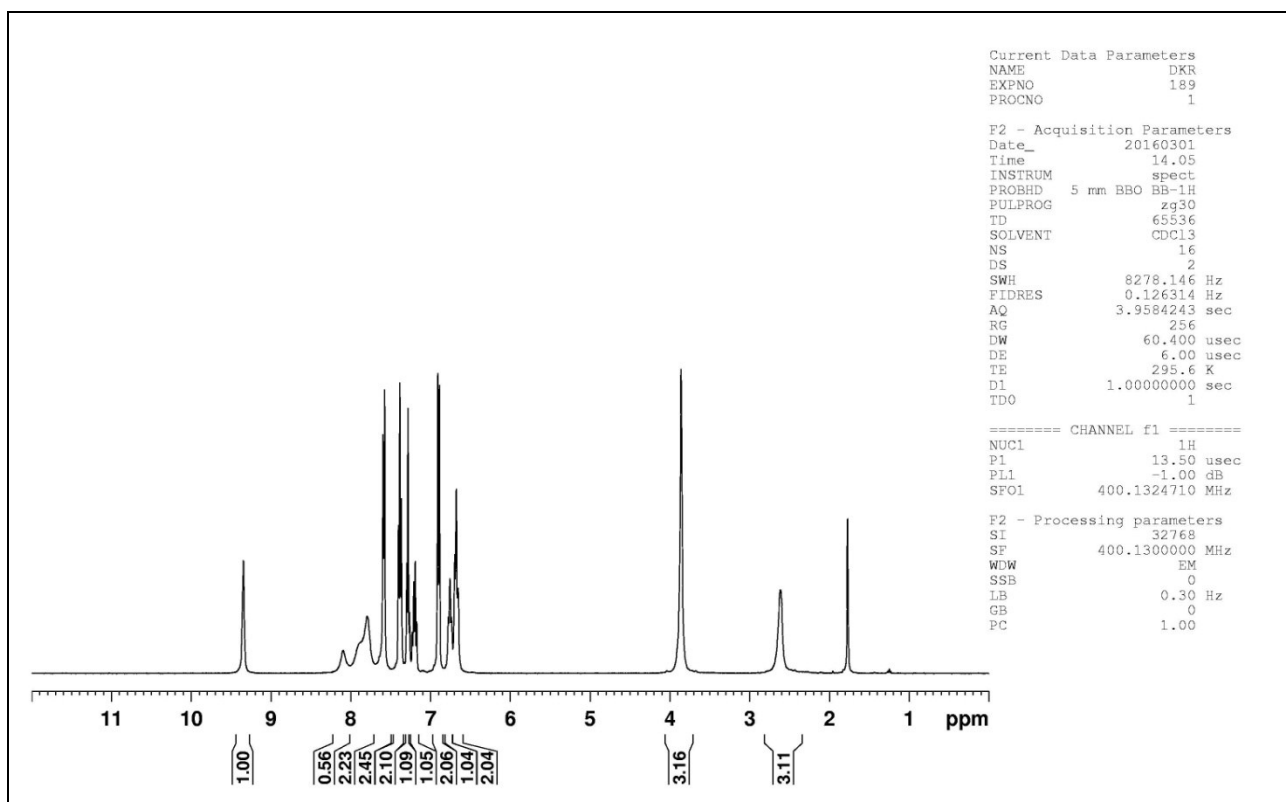

<sup>13</sup>C APT (Attached Proton Test) spectra of compound **6n**

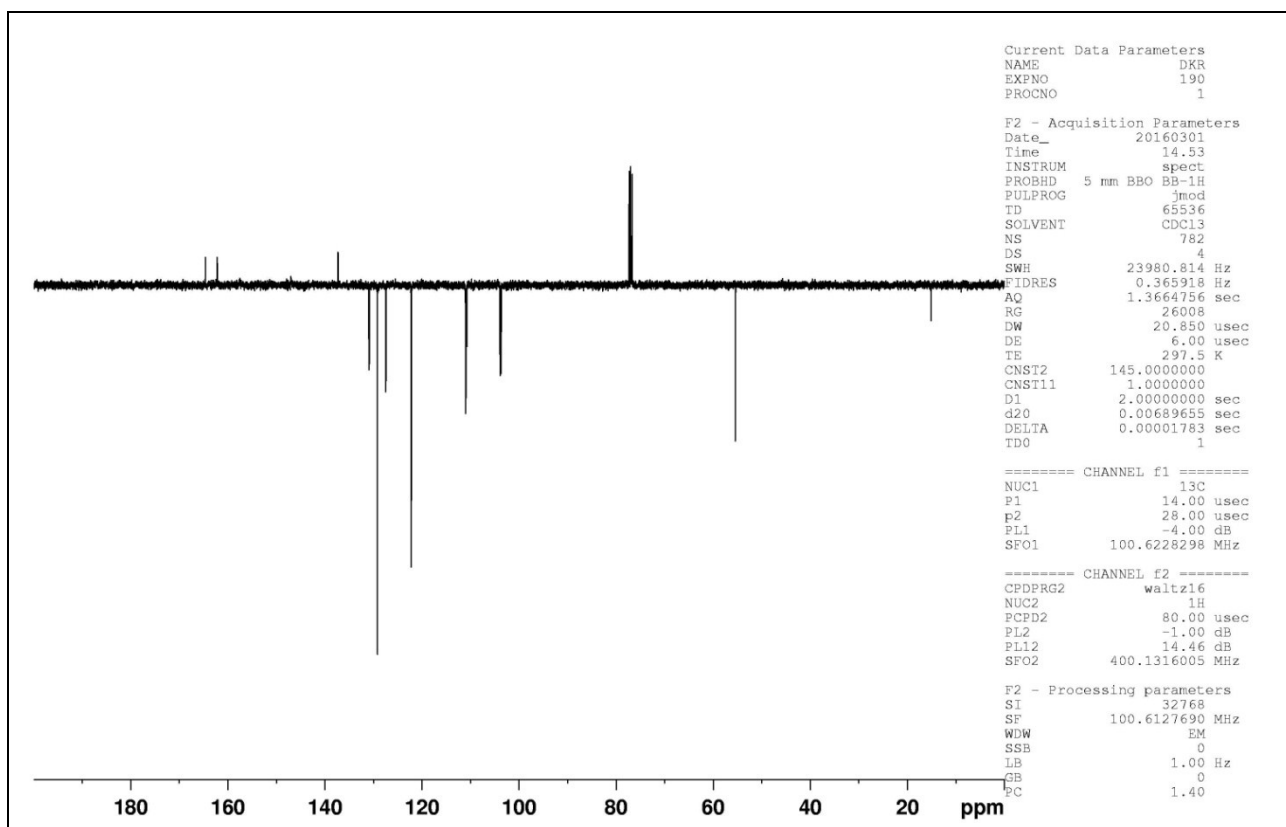

<sup>1</sup>H NMR spectra of compound **6o**

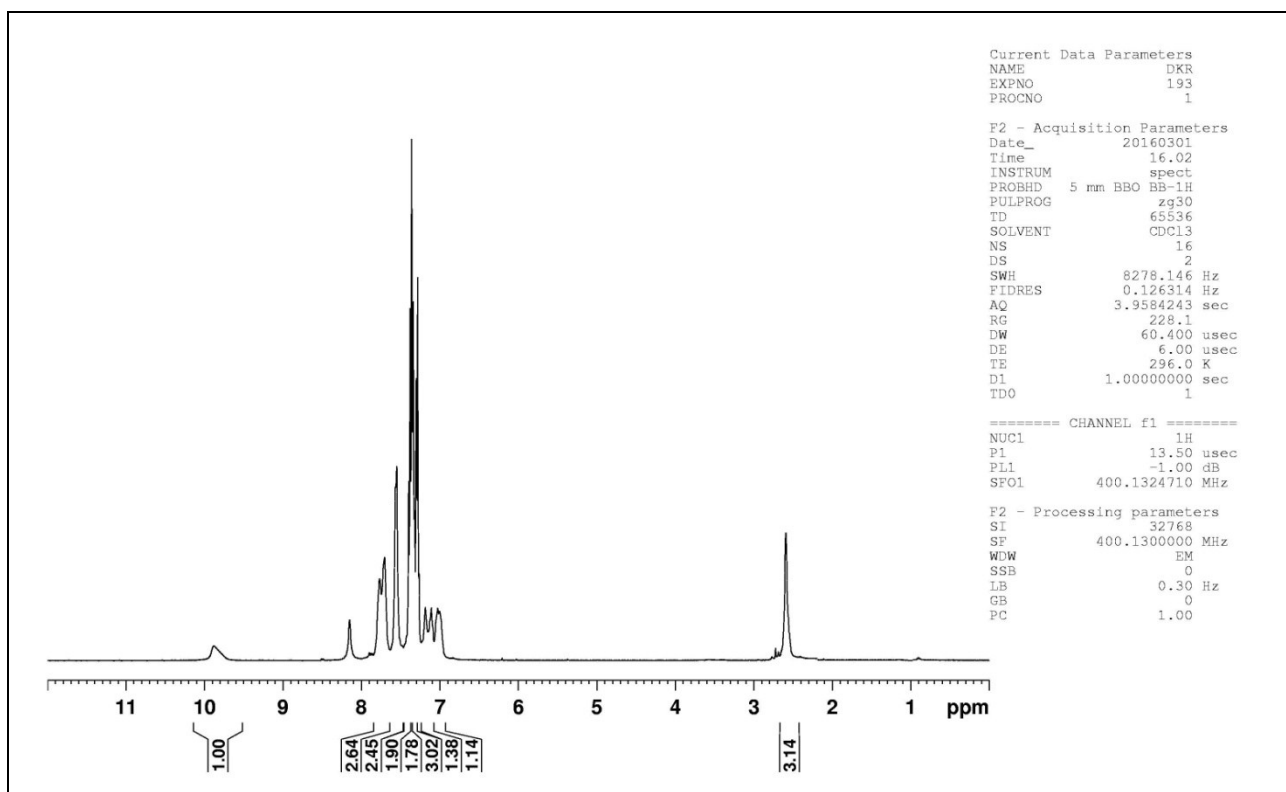

<sup>13</sup>C APT (Attached Proton Test) spectra of compound **60**

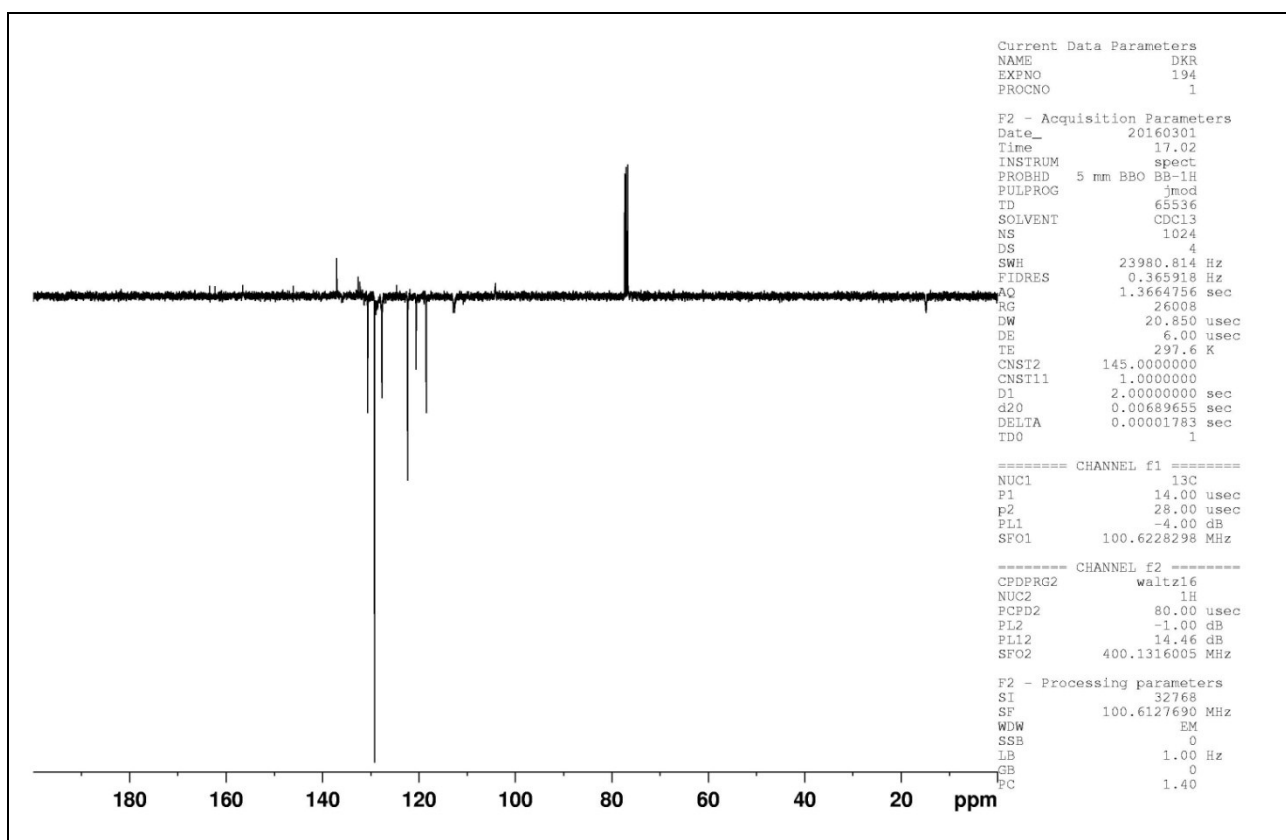

<sup>1</sup>H NMR spectra of compound **6p**

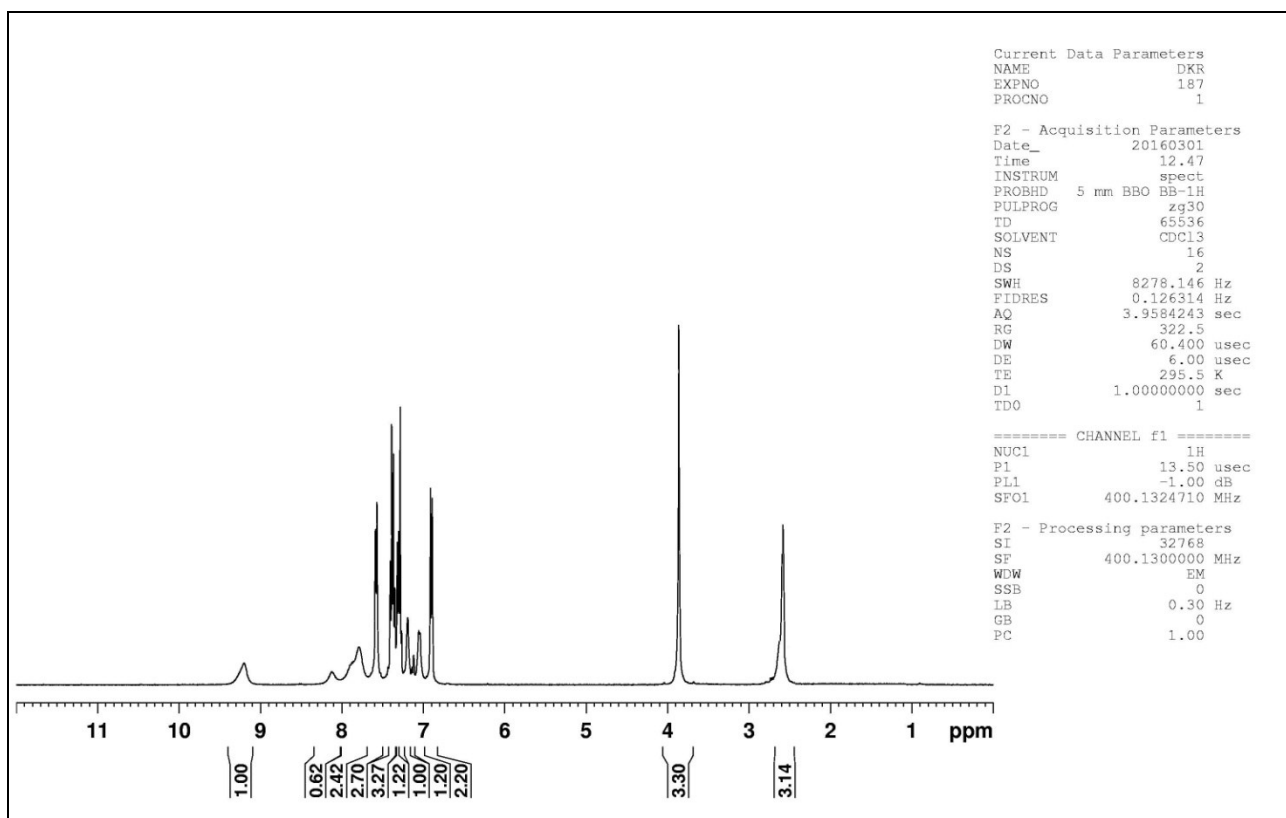



<sup>13</sup>C APT (Attached Proton Test) spectra of compound **6p**

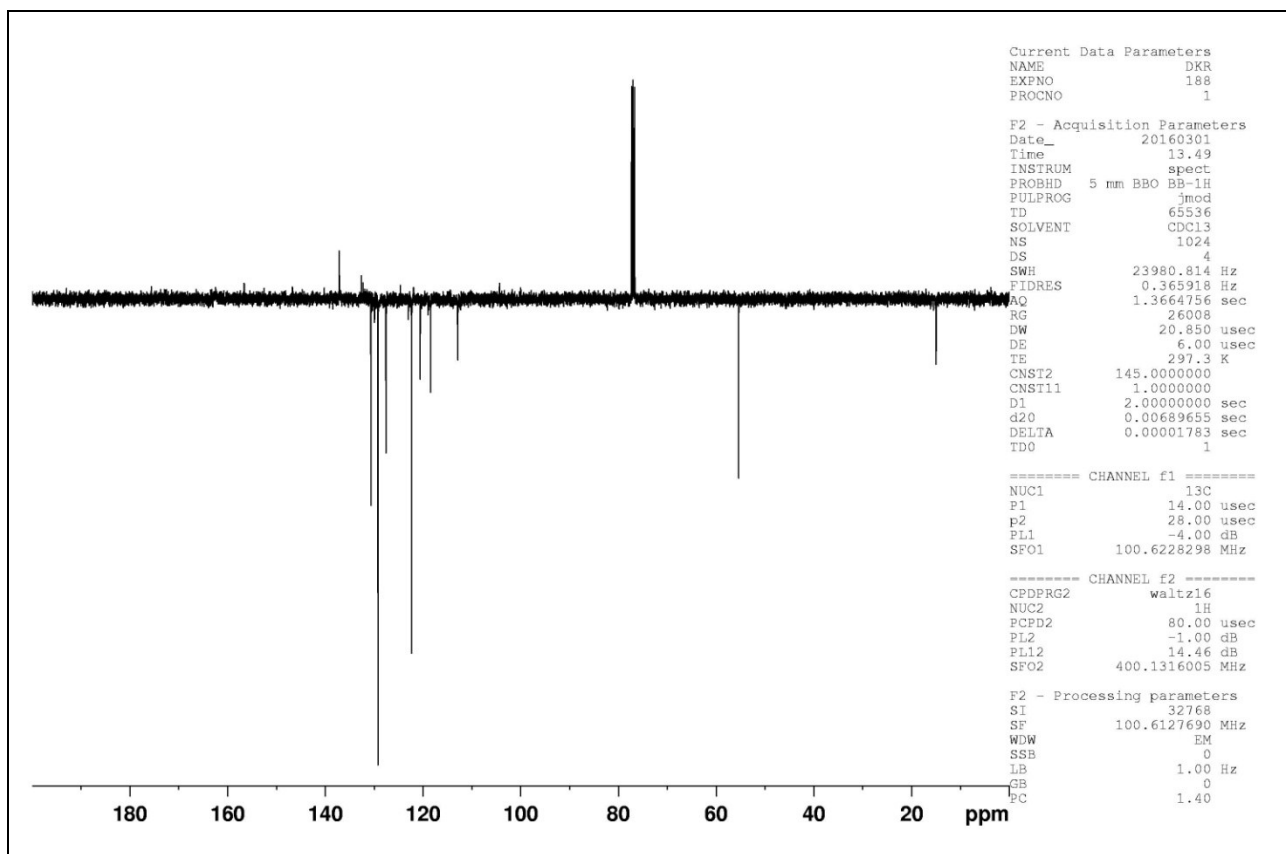

Supplement: c6ra01349j1.pdf [file c6ra01349j1.pdf]
